# Supplementary material for: A neural progenitor mitotic wave is required for asynchronous axon outgrowth and morphology
Source: eLife. 2022 Mar 7;11:e75746. doi: 10.7554/eLife.75746 (PMC8933001; doi:10.7554/eLife.75746)
Supplement: Figure 1—figure supplement 2—source data 1. [file elife-75746-fig1-figsupp2-data1.xlsx]

## Sheet: Figure 1 - figure supplement 2
	A					B					D					E					F
Metric rank (µm)	R1 Control	R2 Control	R3 Control		Metric rank (µm)	R1 ScaBP2	R2 ScaBP2	R3 ScaBP2		Metric rank (µm)	R1 Control (pnr)	R2 Control (pnr)	R3 Control (pnr)		Metric rank (µm)	R1 rac1N17	R2 rac1N17	R3 rac1N17		Metric rank (µm)	R1 RNAisca	R2 RNAisca	R3 RNAisca
-420					-308	0	5.55556	0		-420	0	0	0		-420	0	0	0		-420	0	0	0
-390					-286	0	11.1111	5.26316		-390	0	0	0		-390	0	0	0		-390	0	0	0
-360					-264	0	11.1111	0		-360	0	0	0		-360	0	0	0		-360	0	0	0
-330					-242	4.7619	5.55556	5.26316		-330	0	0	0		-330	0	0	0		-330	0	0	0
-300	0	6.25	0		-220	9.52381	0	5.26316		-300	0	0	0		-300	0	0	0		-300	0	0	0
-270	0	0	6.25		-198	9.52381	16.6667	10.5263		-270	0	0	0		-270	0	0	0		-270	0	0	0
-240	0	6.25	12.5		-176	0	11.1111	10.5263		-240	0	0	0		-240	8.33333	0	8.33333		-240	5.55556	10.5263	5.26316
-210	6.25	37.5	31.25		-154	4.7619	16.6667	15.7895		-210	0	4.54545	8.33333		-210	0	25	0		-210	5.55556	15.7895	10.5263
-180	18.75	25	37.5		-132	33.3333	11.1111	21.0526		-180	0	18.1818	16.6667		-180	8.33333	25	25		-180	5.55556	21.0526	21.0526
-150	31.25	12.5	0		-110	14.2857	5.55556	0		-150	0	54.5455	33.3333		-150	8.33333	0	33.3333		-150	5.55556	31.5789	21.0526
-120	6.25	6.25	6.25		-88	0	0	15.7895		-120	4.16667	18.1818	20.8333		-120	16.6667	41.6667	16.6667		-120	22.2222	21.0526	21.0526
-90	18.75	6.25	6.25		-66	9.52381	5.55556	5.26316		-90	20.8333	0	8.33333		-90	16.6667	8.33333	0		-90	27.7778	0	10.5263
-60	12.5	0	0		-44	9.52381	0	0		-60	33.3333	0	12.5		-60	0	0	16.6667		-60	22.2222	0	10.5263
-30	0	0	0		-22	0	0	0		-30	41.6667	4.54545	0		-30	25	0	0		-30	5.55556	0	0
0	6.25	0	0		0	0	0	5.26316		0	0	0	0		0	0	0	0		0	0	0	0
30	0	0	0		22	0	0	0		30	0	0	0		30	8.33333	0	0		30	0	0	0
60	0	0	0		44	0	0	0		60	0	0	0		60	8.33333	0	0		60	0	0	0
90	0	0	0		66	4.7619	0	0		90	0	0	0		90	0	0	0		90	0	0	0
