# Supplementary material for: A neural progenitor mitotic wave is required for asynchronous axon outgrowth and morphology
Source: eLife. 2022 Mar 7;11:e75746. doi: 10.7554/eLife.75746 (PMC8933001; doi:10.7554/eLife.75746)
Supplement: Figure 2—figure supplement 1—source data 1. [file elife-75746-fig2-figsupp1-data1.xlsx]

## Sheet: Fig2-fig sup1A-B-Source Data
Metric rank (µm)	R1 Control (division time min)
	Pupae 1		Pupae 2		Pupae 3		Pupae 4		Pupae 5		Pupae 6		Pupae 7		Pupae 8		Pupae 9		Pupae 10				Metric rank (µm)	R2 Control (division time min)																						Metric rank (µm)	R3 Control (division time min)
	G	D	G	D	G	D	G	D	G	D	G	D	G	D	G	D	G	D	G	D				Pupae 1		Pupae 2		Pupae 3		Pupae 4		Pupae 5		Pupae 6		Pupae 7		Pupae 8		Pupae 9		Pupae 10					Pupae 1		Pupae 2
-330																								G	D	G	D	G	D	G	D	G	D	G	D	G	D	G	D	G	D	G	D				G	D	G
-300																							-330																							-330
-270																							-300																							-300
-240																							-270																							-270
-210			72	132						129		114											-240																							-240
-180			60	24	147	162	114	147	123	99		96	192	213			135			153			-210																							-210
-150	90	108	42	42	123	165	42	189	57	45	72	183	120	144	72	99	51	60		108			-180																							-180
-120	93	45	72	96	48	96	6	51	99	108	135	81	57	75	90	96	15	48	63	48			-150																							-150
-90	24	57	48	12	48	39	60	66	3	51	36	84	9	66	39	54	6	57	96	93			-120	45													111									-120			72
-60	99	45	24	33	69	66	21	84	54	69	54	42	0	24	60	48	36	69	24	27			-90	27	21		81		93		57	108	81	48			75			15	75		123			-90		57	69
-30	21	15	18	0	105	15	9	33	33	21	30	30	21	21	36	81	18	63	9	18			-60	6	42		54	45	3	117	102	51	54	126	81	42	21		36	12	30		54			-60		12	30
0	0	0	0	0	0	0	0	0	0	0	0	0	0	0	0	0	0	0	0	0			-30	24	45	6	66	36	21	36	111	87	153	63	36	84	24	21	3	15	12	45	51			-30	90	51	48
30	15	9	18	54	54	42	45	15	15	57	120	66	3	33	99	9	12	51	18	51			0	0	0	0	0	0	0	0	0	0	0	0	0	0	0	0	0	0	0	0	0			0	0	0	0
60	9	81	72	162	84	6	66	24	60	108	27	63	27	162	24	3	27	36	6	69			30	75	90	126	12	9	3	66	54	45	30	39	63	24	24	18	45	21	27	9	15			30	75	48	51
90	48	48	189	45	66	144	33	177	81	108	96	165	48	63	57	48	30	81	144	66			60	75	9	30	33	69	27	30	72	24	9	78	27	36	12	30	33	9	30	60	18			60	66	60	48
120	24	63		33	114	93	81	72	57	114	78	168	63	126	63	54	132	60	42	129			90	75	84	30	36	54	78	54	99		75	87	30	15	57	9	63	45	81	21	36			90	51	69	99
150	135	48		72	126	150		57	129	123	66	123	189	75	87	69	60	75	3				120	99	102	66	30	51	90	66	120		105		51	24		21	39	78	18	129	66			120	57	120	96
180		87		117		108		165	141		108				129	57	69	120	33				150			39	96	99		117	141		261		93	36		21		81	66					150	87		135
210		96				162					159								123				180			27									117			75								180	156
240																							210																							210
270																							240																							240
300																							270																							270
330																							300																							300
360																							330																							330
390																							360																							360
																							390																							390
Metric rank (µm)	R1 rac1N17 (division time min)
	Pupae 1		Pupae 2		Pupae 3		Pupae 4		Pupae 5		Pupae 6												Metric rank (µm)	R2 rac1N17 (division time min)																						Metric rank (µm)	R3 rac1N17 (division time min)
	G	D	G	D	G	D	G	D	G	D	G	D											-390	Pupae 1		Pupae 2		Pupae 3		Pupae 4		Pupae 5		Pupae 6												-390	Pupae 1		Pupae 2
-330																							-360	G	D	G	D	G	D	G	D	G	D	G	D											-360	G	D	G
-300																							-330																							-330
-270																							-300																							-300
-240																							-270																							-270
-210																							-240																							-240
-180							63	15															-210																							-210
-150		33		36			12	27			9	72											-180																							-180
-120	66	42		57			9	18			36	66											-150																							-150
-90	33	9		24	72		18	3		96	75	39											-120		42																					-120
-60	12	21		42	51		51	3	48	51	18	21											-90	33	18	33			63	78		45														-90	30	30
-30	15	9	99	6	81	33	9	51	33	21	18	24											-60	24	27	33	18	18	81	63	15	54														-60	12	12	138
0	0	0	0	0	0	0	0	0	0	0	0	0											-30	6	63	102	0	18	57	33	0	51	42	9												-30	0	42	39
30	9	39	51	45	45	12	24	21	99	36	30	6											0	0	0	0	0	0	0	0	0	0	0	0												0	0	0	0
60	81	33	21	45	12	6	54		51	48	93	15											30	6	27	0	45	105	12	75	12	66	33	30												30	15	15	42
90	75	48	30	81	63	24	24		45	60	33	54											60	42	57	12	51	6	54	69	18	57	3	48												60		18	42
120	87	45	12	12	75	3			6	117		60											90			24	51		90				18	21												90		54	66
150	54	51	54		42	15			48	84		84											120				51		42				3	48												120		99
180		21	60		60	39			99	111													150																							150
210			45			72			96	75													180																							180
240			78			39																	210																							210
270																							240																							240
300																							270																							270
330																							300																							300
360																							330																							330
390																							360																							360
																							390																							390
Genotype	Control
Linear regression	Row 1		Row 2		Row 3
	Anterior	Posterior	Anterior	Posterior	Anterior	Posterior
Best-fit values ± SE
Slope	-0.5417	0.4621	-0.3621	0.3426	-0.4985	0.5635
1/slope	-1.846	2.164	-2.762	2.919	-2.006	1.775
Speed (µm/min)	1.846	2.164	2.762	2.919	2.006	1.775
R square	0.9068	0.9202	0.9639	0.7321	0.6585	0.9426
Equation	Y = -0,5417*X + 10,85	Y = 0,4621*X + 29,66	Y = -0,3621*X + 33,71	Y = 0,3426*X + 25,00	Y = -0,4985*X + 33,19	Y = 0,5635*X + 20,02
Genotype	Rac1N17
Linear regression	Row 1		Row 2		Row 3
	Anterior	Posterior	Anterior	Posterior	Anterior	Posterior
Best-fit values ± SE
Slope	-0,02748 ± 0,04033	0,1483 ± 0,03153	-0,04935 ± 0,04737	-0,05545 ± 0,03652	-0,1102 ± 0,03911	0,3235 ± 0,127
1/slope	-36.4	6.741	-20.26	-18.03	-9.073	3.091
Speed (µm/min)	36.4	6.741	20.26	18.03	9.073	3.091
R square	0.104	0.7867	0.2134	0.4346	0.7988	0.1603
Equation	Y = -0,02748*X + 33,54	Y = 0,1483*X + 32,61	Y = -0,04935*X + 34,76	Y = -0,05545*X + 41,41	Y = -0,1102*X + 34,55	Y = 0,3235*X + 20,39
[truncated: 19 more columns]

## Sheet: Fig2-fig sup1C-Source Data
	Metric rank (µm)	R1 RNAisca
	-330	Pupae 1		Pupae 2		Pupae 3		Pupae 4		Pupae 5		Pupae 6		Pupae 7		Pupae 8		Pupae 9
	-300	G	D	G	D	G	D	G	D	G	D	G	D	G	D	G	D	G	D
	-270
	-240
	-210
	-180	18								45			42		78				114
	-150	75		66			66	39		42	33		144	60	138	78			72
	-120	75	108	45			45	51		114	105	51	12	24	39	45		30	36
	-90	69	159	24			24	42	15	24	36	24	6	81	33	21		63	63
	-60	144	87	111	90	90	111	45	45	3	24	18	18	36	144	9	39	48	9
	-30	0	45	3	33	33	3	81	63	24	33	15	3	45	39	36	117	33	18
	0	0	0	0	0	0	0	0	0	0	0	0	0	0	0	0	0	0	0
	30	6	30	6	60	60	6	12	15	30	33	6	105	57	24	42	96	9	24
	60	3	78	3	15	15	3	15	21	42	51	3	81	39	51	3	9	9	75
	90	3	36	63	6	6	63	87	27	39	105	36	108	81	42	57	84	18	15
	120	21	93	57	27	27	57	66	6	51	39	48	75	54	45	90	60	33	33
	150	72	81	72	72	72	72	60	93	24	36	96	102	84	120	54	36	54	36
	180	93	60	0	27	27			30		93	75	120	81	63		78		63
	210				39	39			54								6
	240				78	78			51								33
	270				48	48											24
	300
	330
	360
	390
	Metric rank (µm)	R2 RNAisca
	-240	Pupae 1		Pupae 2		Pupae 3		Pupae 4		Pupae 5		Pupae 6		Pupae 7		Pupae 8		Pupae 9
	-210	G	D	G	D	G	D	G	D	G	D	G	D	G	D	G	D	G	D
	-180
	-150
	-120			39	15	39	15				21			24					36
	-90			12	18	12	18	51	102		72	78	45	36	33			72	9
	-60			39	3	39	3	24	54	33	27	30	27	96	69	66		48	75
	-30	141	36	33	9	33	9	21	30	36	45	42	0	69	48	78	15	117	12
	0	0	0	0	0	0	0	0	0	0	0	0	0	0	0	0	0	0	0
	30	30	15	48	9	48	9	24	72	12	42	60	33	18	24	51	6	48	21
	60	120	60	141	0	141		18	33	51	30	27	60	24	27	63	18	117	9
	90	57	60	15		15		24	66	39	60	60	60	48	111	72	21	54	6
	120	78	105	126		126		57	75	105	126	66		63	57	45	36	117	18
	150	126	51	75		75		72	117	156				90	81	84		90	66
	180	132	24	45		45			123							48		75	75
	210
	240
	270
	Metric rank (µm)	R3 RNAisca
	-210	Pupae 1		Pupae 2		Pupae 3		Pupae 4		Pupae 5		Pupae 6		Pupae 7		Pupae 8		Pupae 9
	-180	G	D	G	D	G	D	G	D	G	D	G	D	G	D	G	D	G	D
	-150
	-120									93						12
	-90		96		24		24	3	51	21	54	51			21	21
	-60	54	150	33	24	33	24	21	42	84	48	21	24	36	24	12	60
	-30	150	21	12	9	12	9	18	27	42	12	144	18	12	0	9	24	36	102
	0	0	0	0	0	0	0	0	0	0	0	0	0	0	18	0	0	0	0
	30	24	45	39	27	39	27	45	9	63	87	72	0	0	54	54	24	3	27
	60	93	99	42	66	42	66		30	51	18	30	9	30	42		51	0	15
	90	60	48	105	54	105	54		12	48	114	120	18	12	72		78	18	90
	120			42		42			51		75	48	96	42	87			72	15
	150			45		45			108		96	87	3	15	99			0	36
	180			87		87			51		141	0	78	75	0				93
	210								84		87	0	114	87	0				87
	240												123	51
	270
	300
	330
	Genotype	ScaRNAi
	Linear regression	Row 1		Row 2		Row 3
		Anterior	Posterior	Anterior	Posterior	Anterior	Posterior
	Best-fit values ± SE
	Slope	-0,1686 ± 0,08467	0,0561 ± 0,06099	0,1576 ± 0,09048	0,3172 ± 0,1109	-0,1383 ± 0,09706	0,1929 ± 0,04038
	1/slope	-5.932	17.83	6.346	3.152	-7.233	5.185
	Speed (µm/min)	5.932	17.83	6.346	3.152	7.233	5.185
	R square	0.4978	0.1078	0.6027	0.6716	0.5036	0.7917
	Equation	Y = -0,1686*X + 37,1	Y = 0,0561*X + 38,95	Y = 0,1576*X + 50,6	Y = 0,3172*X + 29,36	Y = -0,1383*X + 31,81	Y = 0,1929*X + 32,99
