# Supplementary material for: A neural progenitor mitotic wave is required for asynchronous axon outgrowth and morphology
Source: eLife. 2022 Mar 7;11:e75746. doi: 10.7554/eLife.75746 (PMC8933001; doi:10.7554/eLife.75746)
Supplement: Figure 2—source data 1. [file elife-75746-fig2-data1.xlsx]

## Sheet: Fig2C-Source Data
	Control														rac1N17
Time (min)	Cell1	Cell2	Cell3	Cell4	Cell5	Cell6	Cell7	Cell8	Cell9	Cell10	Cell11				Cell1	Cell2	Cell3	Cell4	Cell5	Cell6	Cell7	Cell8	Cell9	Cell10	Cell11
-98			586		450.679				267.019	372.189	194.264						321.245		432.604	327.434		269.283	344.264		145.358
-96			746.642		443.887	395.962			285.396	463.283	191.736						405.623		267.736	284.83		255.585	288.566		165.472
-94			835.132		465.321	373.434			248.34	446.717	213.774				223.245		294.264		375.019	249.057		260.604	306.528		256.226
-92	462.189		689.321		398.415	388.302			240.377	468.151	155.547				301.019		233.962		397.509	226.83		265.509	280.453		245.396
-90	437.811		650.717	193.698	325.208	406.981			220.792	425.736	236.113				322.226		261.736		575.057	247.736		343.208	398.868		332.943
-88	484.302		640.943	257.094	351.811	379.66			235.623	477.094	172.792				422		253.132		494.34	235.434		237.736	376.075		316.226
-86	486.83		497.774	259.736	316.113	429.17			338	476.868	186.075				360.528		235.472		431.057	269.132		268.83	388.189		294.566
-84	525.094	319.17	527.585	265.17	314.642	463.283	395.208	167.623	273.132	436.528	226.226				348.906		265.057		295.66	300.792		278.151	507.925		184.264
-82	502.302	301.283	491.321	364.943	403.17	390.151	381.962	189.736	266.868	510	278.981				262.981		306.943		363.925	363.962		380.604	391.358		188.453
-80	564.113	340.302	524.038	471.962	390	430.566	377.019	157.245	255.736	501.698	249.774				302.377		269.472		360.868	386.906	234.415	266.302	483.962	254	209.094
-78	669.736	297.623	537.132	308.151	387.472	531.321	393.925	147.283	186.377	550.264	208.566				308.981		201.208	487.358	326.113	290.189	252.189	261.321	506.151	292.642	227.547
-76	536.679	300.302	540.792	324.377	448.679	538.981	375.396	246.792	179.132	682.113	166.981				307.396		233.17	192.868	309.019	301.208	309.358	313.094	345.887	312.528	304.566
-74	540.528	293.66	679.396	469.66	487.132	429.925	378.981	209.547	202.491	580.792	177.094				493.17		289.17	172.189	353.585	312.868	344.34	279.925	372.226	456.604	412.113
-72	529.245	278.981	687.132	460.377	545.623	387.396	352.604	225.736	183.887	551.396	179.132				400.528		304.642	143.925	348.943	374	289.094	303.736	399.509	407.283	413.811
-70	405.736	361.472	772.264	596.302	467.887	427.245	326.604	268.264	223.509	521.925	147.774				473.358		346.981	134.226	306.943	389.472	336.038	298.226	497.509	281.321	550.491
-68	430.566	370.302	902.566	430.755	399.396	327.66	303.774	253.623	234.453	482.226	148.415				435.623		333.057	124.151	341.17	375.547	348.566	344.943	434.717	282.943	249.434
-66	464.415	391.585	752.792	508.302	351.094	351.358	283.509	211.887	198.981	501.66	170.943				360.604		375.811	134.717	269.094	309.245	312.642	437.585	463.283	307.358	297.736
-64	411.66	725.17	541.698	334.792	363.623	400.906	252.679	225.509	200.604	429.736	210.528				329.509	259.774	287.509	126.906	270.792	292.642	264.453	401.019	535.547	248.943	272.755
-62	462.906	358.377	547.887	389.736	355.925	365.472	258.717	216.491	222.491	562.151	184.717				272.491	264.377	276.264	118.981	299.698	318.981	294.264	482.377	401.019	272.075	344.604
-60	462.792	479.849	553.623	359.811	454.075	404.34	251.509	307.925	300.755	514.679	206.642				219.849	263.623	441.472	119.094	315.774	344.038	331.887	469.283	456.981	277.811	476.302
-58	469.472	500.604	539.774	379.925	439.811	457.208	286.528	274.717	351.321	455.547	241.547				218	306.642	407.774	113.472	274.189	321.623	368.264	466.943	339.094	297.509	343.962
-56	515.849	473.057	531.585	401.887	347.132	631.736	439.17	303.925	327.472	413.472	209.698				242.491	286.943	395.509	122.189	211.887	272.377	310.528	418.566	354.302	306.566	324.302
-54	550.113	433.283	527.132	272.528	493.358	518.642	405.245	281.811	337.585	422.755	257.283				280.679	315.396	452.981	120.868	216.642	318.453	327.925	441.208	311.623	304.264	262.075
-52	605.925	370.415	415.321	306.453	421.962	520.868	360.264	377.774	280.377	484.604	238.566				324.377	321.396	387.66	126.566	224.038	310.264	272.038	350.151	239.17	318.302	259.698
-50	653.585	335.17	340.792	372.566	436.038	539.132	281.585	370.981	246.226	594.151	296.491				316.868	376.604	375.208	156.113	199.66	280	335.057	312.755	263.925	316.981	252.151
-48	550.528	410.038	328.113	417.245	443.434	494.981	308.453	360.377	333.66	672.34	245.66				267.962	388.491	256.755	165.66	277.585	311.208	198	320.642	274.792	352.792	279.623
-46	529.962	346.604	373.396	325.396	375.434	497.245	274.679	298.679	363.849	746.415	214.264				349.208	351.509	288.491	147.208	331.17	348.453	244.566	309.094	379.811	335.208	311.811
-44	462.34	465.17	390.943	270.642	406.792	445.396	243.321	333.509	287.623	631.208	322.604				301.321	365.736	228.415	140.34	375.358	391.736	234.906	263.547	295.283	274.981	321.245
-42	524.943	396.755	410.906	352.226	497.962	495.811	232.528	402.642	350.075	728.981	265.962				353.623	422.943	258.943	163.849	283.472	335.094	233.849	260.83	268.943	289.698	352.981
-40	349.057	348.528	413.283	305.887	534.189	528.075	229.66	381.585	258.528	625.849	238.981				264.528	387.849	242.566	137.245	354.038	343.811	305.094	208.151	260.792	243.17	223.585
-38	448.566	312.755	411.208	408.792	343.509	470.415	243.17	266.755	302.906	443.962	278.34				228.189	437.358	215.887	126.83	289.17	271.736	279.887	237.774	222.792	308.415	363.849
-36	330.453	215.547	422.528	320.679	402.075	381.208	237.887	296	315.245	493.774	341.736				325.623	390.264	190.566	139.66	251.396	290.151	335.547	339.887	322.906	335.585	341.66
-34	408.943	276.717	386.302	329.057	506.038	400.34	278.906	277.925	250.604	482.566	294				284.528	336.113	234.075	142.943	259.774	419.547	292.377	358.868	395.736	320.679	426.604
-32	470.226	229.509	381.472	260.566	550.415	363.849	288.302	278.189	332.792	682	297.509				290.679	397.208	279.472	162.226	311.283	352.868	303.019	332.226	436.189	263.057	378.113
-30	505.585	242.83	425.585	307.396	450.868	410.302	248.038	274.264	231.396	657.774	272.038				372.642	497.774	259.547	147.17	235.698	357.245	251.17	327.019	334.377	323.623	362.264
-28	485.925	278.717	361.396	289.472	590.906	328.264	274.943	294.83	299.547	542.755	298.981				272.226	363.245	289.358	147.434	252.264	369.434	269.132	266.075	379.094	338.151	356.906
-26	299.245	322.302	333.019	317.887	559.811	336.377	233.396	299.736	279.094	532.642	402.792				264.755	280.755	195.811	137.774	314.264	374.34	266.755	359.019	342.906	368.34	346.453
-24	307.623	313.321	366.415	367.698	359.66	340.151	236.792	320.792	285.849	324.453	467.66				342.642	230.453	230.264	135.547	315.509	380.642	301.057	317.019	332.302	316.189	318.717
-22	267.434	291.472	330.528	287.17	315.811	457.66	259.321	348.604	317.208	314.566	317.17				306.151	235.66	224.717	130.415	363.66	450.943	312.717	394.415	330.491	407.698	324.038
-20	289.887	233.774	321.774	307.019	320.604	454.792	234.792	339.736	265.887	293.094	227.17				232.264	241.132	218.83	143.585	235.358	448.415	358.868	338.491	346.943	342.906	411.698
-18	296.981	231.358	281.019	268.113	272.717	360.415	245.208	364.792	330.491	234.717	294.377				332.566	236.151	229.774	154.302	237.585	390.792	287.358	302.264	258.302	349.736	309.736
-16	217.509	179.774	236.415	242.755	235.66	382.113	234.189	261.396	269.057	181.396	225.019				253.245	258.226	251.962	155.698	241.774	404.302	336.038	267.17	184.642	382.528	320.755
-14	148.038	153.887	209.472	237.962	212.34	309.208	227.094	287.698	245.623	189.057	220.491				168.189	197.623	224.83	107.434	293.17	393.094	251.057	172.868	139.774	249.132	251.736
-12	155.208	139.094	198.755	222.528	186.34	267.019	210.151	332.113	194.943	222.151	216.981				152.038	166	158.415	113.019	162.377	209.472	147.094	147.17	133.849	194.34	143.925
-10	176.566	122.113	186.981	188.981	158.075	252.642	203.245	262.906	212.075	228.415	190.34				174.566	163.774	137.585	108.755	146.566	138.453	131.057	131.849	141.019	225.887	124.34
-8	218.642	153.132	211.66	181.396	174.075	272.792	192.453	231.094	188.717	281.472	139.547				164.792	142.792	132.755	112	134.226	111.396	120.868	123.019	144.189	203.057	126.792
-6	205.698	172.868	255.17	187.396	174.717	305.057	211.321	225.925	204.264	398.981	131.472				144.604	166.566	142	118.264	155.623	127.509	146.755	152.264	172.906	244.642	227.132
-4	191.849	149.132	251.057	172.868	205.434	317.321	221.434	214.642	247.509	402.377	147.547				148.226	140.453	160.717	150.189	166.453	159.245	103.736	151.623	236.792	232.981	172.302
-2	173.208	133.321	279.66	149.245	215.396	248.755	234.453	214.302	289.509	419.094	152.34				159.019	163.17	167.623	166.491	175.774	166.604	111.208	179.396	222.453	150.113	167.17
0	158.868	154.755	252.943	154.679	218.491	207.547	246.604	202.642	216.151	367.245	130.226				152.528	163.208	140.226	145.887	139.925	171.434	127.132	164.189	142.604	144.981	177.736

## Sheet: Fig2D-Source Data
	Control																						scaBP2
Time (min)	Cell1	Cell2	Cell3	Cell4	Cell5	Cell6	Cell7	Cell8	Cell9	Cell10	Cell11	Cell12	Cell13	Cell14	Cell15	Cell16	Cell17	Cell18	Cell19	Cell20			Cell1	Cell2	Cell3	Cell4	Cell5	Cell6	Cell7	Cell8	Cell9	Cell10	Cell11	Cell12	Cell13	Cell14	Cell15
-100			311.925	321.774			361.208	346.679	243.623	293.208	232.113	256.755	325.887	375.17	255.434	310.566	267.547		453.057				339.472				291.17	193.887	338.038				282.868	219.774	359.472	256.038	280.189
-98			341.434	382.453			307.358	314.151	187.962	243.358	203.547	288.83	282.491	328.679	268.604	274.491	368.906		439.66				360.491				365.962	162.226	351.321				299.132	235.208	336.377	224.415	264.755
-96			322.302	386.717			312.34	285.774	234.151	267.472	244.491	318.679	196.755	270.943	260.868	300.226	351.434		514.491				416.038		297.17	315.66	332.264	178.906	415.283			236.906	345.736	231.358	317.698	179.434	208.113
-94			317.321	434.83			303.698	289.925	245.208	212.83	258.717	256.038	268.491	297.358	240.491	430.453	321.736		420.906				513.472		304.604	346.604	350.491	205.283	460			206.906	363.66	226.189	350.906	132.453	211.396
-92			298	394.34		310.189	268.377	326.83	224	243.66	212.642	287.132	222.075	350.075	237.774	309.396	340		432.226				466.642		292.604	351.358	327.132	215.434	540.226			233.849	380.906	184.792	319.132	148.302	308.491
-90			348.679	404.566		312.151	265.434	379.623	202.868	216.604	214.83	289.17	205.774	374.453	241.321	268.679	331.057		477.057				373.962		305.396	361.472	332.642	219.585	508.566			216.755	352.151	187.434	341.66	156.679	227.245
-88			344.453	406.792		261.132	269.774	342.151	167.962	233.623	260.906	294.943	298.717	441.811	231.962	353.358	349.509		421.358				333.472		327.132	400.83	328	211.547	460.792		333.585	240.264	324.755	203.509	379.019	147.019	239.208
-86			330.604	443.245		301.17	277.094	311.887	240.83	228.34	250.679	300.415	297.66	344.453	246.792	378.566	382.943		455.887				337.66	229.849	354.302	400.151	307.245	255.057	370.906		376.717	276.717	306.679	172.453	322.302	132.453	300.189
-84			331.509	425.849		296.453	284.34	288.604	253.849	211.434	283.094	348.302	250.453	462.792	230.151	417.472	351.057	395.509	359.925				369.208	224.981	326.151	403.019	289.434	274.943	386.642		362	217.208	321.887	181.66	367.208	126.755	346.868
-82			318.566	456.792	249.736	255.925	274.868	274.755	245.321	240.642	281.019	393.925	281.623	442.377	248.113	333.283	335.321	340.34	424.264				375.094	233.962	317.132	379.774	312.604	248.453	416.717		417.245	272.83	336.943	169.623	409.019	117.057	326.302
-80		230.415	272.566	396.302	261.887	238.906	310.189	230.943	227.094	262.038	276.642	404.981	243.623	390	265.811	344	352.83	342.981	383.358				398.528	253.736	316.151	271.887	344.642	260.075	505.962		464.943	257.698	304.113	193.094	380.264	125.509	256.755
-78		272.189	327.887	384.453	288.679	210.038	261.358	255.962	288.453	327.019	261.509	303.094	270.302	361.472	231.245	324.943	343.736	361.962	384.717				456.038	235.623	387.17	297.509	358.491	230.302	558.075		505.774	240.755	298.604	200.792	389.66	146.792	219.321
-76		268.83	338.792	363.962	297.547	252.792	281.736	217.811	293.547	299.925	238.075	337.623	278.566	330.491	198.679	396.906	362.453	276.377	338.981				373.396	267.472	260.151	386.528	359.358	229.887	446.264		486.453	262.679	289.698	203.887	383.132	138.83	200.906
-74		289.17	313.509	379.698	326.755	342.151	274.604	251.547	286.717	265.358	246.075	342.377	262.679	324.453	218.566	395.434	370.642	263.585	410.038				417.358	251.547	347.132	316.755	318.113	224.264	639.774		449.623	249.132	300.415	221.17	340.755	152.302	181.472
-72		331.509	267.208	402.038	306.038	340.792	277.811	218.906	247.358	289.057	261.623	352.075	212.377	331.057	225.472	272.113	416.075	280.302	449.019				446.415	262.189	333.925	325.698	290.113	211.057	525.811		423.66	232.113	259.17	209.585	306.868	145.208	191.321
-70		328.83	281.811	396.491	358.792	290.717	266.755	236.642	243.849	334.868	246.264	372.528	241.132	310.83	256.377	313.547	449.774	306.302	421.019				357.66	280.566	338.453	303.094	333.849	252.226	538.491		378.642	205.434	289.283	232.491	286.755	158.604	184.075
-68		318.226	307.849	362.906	347.962	365.057	312.642	189.17	252.566	314.075	248.491	390.792	280.302	276.792	239.208	276.075	411.396	314.34	386.34				377.962	274.34	290.453	376.943	311.057	190.717	509.434		390.604	192.038	276.113	268.226	344.075	183.396	194.528
-66		333.396	301.585	373.132	320.453	410.755	316.755	224.453	245.019	359.962	291.358	353.547	269.698	265.094	321.547	265.434	357.623	276.491	408.453				396	314.604	312.415	340.642	411.208	263.019	487.887	414.075	398.642	214.377	259.208	258.453	345.811	209.509	160
-64		353.66	365.623	346.679	318.717	454.151	328.415	259.434	214.717	375.887	259.321	328.755	276.038	256.415	363.321	300.642	357.774	313.849	375.019	316.943			411.849	310	266.566	362.491	328.642	288.943	464.755	478.34	419.472	201.434	262	202.189	294.491	169.811	252.226
-62		340.679	371.094	418.189	299.245	386.113	283.509	288.943	258.981	348.906	307.396	381.811	268.566	307.925	252.189	343.019	318.755	286.604	384.755	329.057			446.566	337.925	320.943	407.283	285.321	275.358	411.547	395.509	481.736	242.755	258.981	236.189	280.075	187.547	232.717
-60		309.094	413.887	327.849	318.981	397.321	227.283	307.208	223.434	297.698	277.396	386.642	246.038	357.585	272.604	309.472	327.925	304.604	354.415	255.472			418.604	255.887	358.943	371.132	280.377	271.434	411.094	448.679	449.962	260.302	252.189	246.528	295.245	159.245	216.491
-58		337.283	415.396	315.019	355.887	357.358	239.887	291.019	228.906	310.491	276.868	348.113	226.491	330.528	179.283	256.34	348.377	346.038	307.811	271.358			439.585	283.585	347.283	396.528	342.075	330.943	365.547	442.415	344.038	233.434	245.887	237.623	292.717	170.906	177.925
-56		319.925	401.66	323.962	321.585	349.547	272.377	212.604	276.302	268.491	312.868	364.868	206.792	257.208	194.226	323.887	421.811	326.604	259.094	358.755			445.396	290.981	368.943	457.094	285.547	289.472	420.792	488.566	362.34	233.17	254.491	234.491	296.453	167.623	165.811
-54		348.151	450.34	329.396	330	382.34	282.755	220.038	313.925	302.377	248.679	387.849	267.057	228.906	225.887	370.792	359.811	341.962	303.623	341.623			438.151	307.472	299.887	472.113	274.151	338.415	413.66	376.679	362.34	264.981	258.226	232.943	311.283	162.528	238.264
-52		408.528	366.226	326.906	310.717	430.792	287.132	231.849	303.434	295.509	274.075	390.943	233.057	303.434	245.472	288	374	332.226	324.868	383.245			472.604	400.34	385.245	374.679	237.17	380.83	427.132	429.887	346.642	228.981	283.736	280	291.925	154.038	240.264
-50		428.038	411.66	332	335.472	369.208	328.755	256.491	323.434	267.472	248.792	425.66	253.736	257.057	292.491	306.566	399.094	290.83	249.547	385.17			433.094	328.038	467.358	386.264	266.34	321.811	481.623	441.698	346.264	247.396	251.396	270.792	285.698	160	235.283
-48	328.604	464.755	423.547	295.358	336.528	325.472	318.868	241.283	344.491	295.17	303.094	409.66	284.075	244.038	246.679	325.396	396.453	326.151	286.453	429.962			425.925	316.755	361.358	403.245	251.698	308.528	398.566	543.585	340.189	265.736	295.358	246.868	290.226	145.849	207.396
-46	322.566	503.66	402.755	374.34	396.755	450.189	364.528	196.868	316.34	282.981	222.604	442.302	269.283	281.962	265.887	336.113	393.547	275.66	262.642	358.151			434.264	287.321	340.226	383.66	259.245	312.226	391.208	454.717	290.943	218.981	250.226	284.377	305.509	139.245	210.566
-44	264.377	414.038	457.321	325.774	395.358	462.453	317.208	230.868	344.792	369.472	261.66	411.321	299.849	238.981	280.83	335.774	471.057	281.774	250.34	291.774			491.925	294.981	333.774	407.132	303.66	360.792	475.358	467.245	269.66	237.358	258.981	270.226	311.887	157.849	223.849
-42	284.189	447.358	440.868	326.34	393.019	440.075	315.472	235.283	335.245	330.792	247.132	421.396	338.151	272.189	219.434	292.226	439.66	256.453	271.698	301.925			439.132	288.943	324.604	404.34	309.472	330	394.604	462.264	357.736	236.491	228.528	254.264	300.226	137.509	186.792
-40	239.283	456.566	378.792	327.434	388.491	433.623	331.887	231.849	283.962	322.906	244.415	409.66	293.358	252.943	168.038	218.83	487.66	252.83	316.906	251.774			483.208	287.094	420.528	402.642	346.717	326.717	395.094	508.83	308.151	222.981	192.415	277.434	230.491	170.302	165.547
-38	266	422.717	402.113	335.774	359.396	369.887	296.868	224.906	274.491	336.679	251.698	468.415	280.113	244	191.019	263.811	374.264	225.547	256.453	246.34			453.17	267.434	322	500.642	313.736	262.943	413.962	414.038	307.472	217.17	192.755	241.17	204.075	168.377	180.377
-36	282.34	460.453	402.604	309.396	339.132	396.566	273.547	208.981	266.377	278.113	282.264	427.887	264.34	189.283	187.057	250.642	413.245	271.623	288.491	225.019			446.528	234.566	332.868	493.208	301.208	297.962	422.151	353.434	263.698	200.717	179.358	226.679	228.226	177.623	225.623
-34	283.094	440.491	460.528	273.17	318.264	377.057	280.038	197.057	271.849	276.34	284.528	404.906	286.717	202.075	202.83	299.472	396.302	240.83	207.132	207.321			466.038	277.623	355.094	474.038	262.151	284.642	368.642	345.66	289.623	196.491	208.906	290.151	232.528	221.887	186.491
-32	285.509	427.17	382.868	322.415	323.057	346.943	263.887	208.264	289.66	236.717	278.868	355.887	282.453	181.283	188.075	254.792	490.491	241.208	235.698	240.717			416.264	304.943	396.792	469.962	237.396	274.415	315.698	365.925	294.491	202.83	253.547	234.717	270.377	215.849	197.962
-30	318.981	474.377	436.491	318.453	299.585	329.811	257.585	218.34	252.151	232.226	281.358	352.34	331.925	176.981	210.642	219.434	436.302	242.226	215.434	226.226			461.283	278.415	336.868	454.377	251.321	399.358	360.981	326.34	252.264	192.415	228.226	269.396	214.981	204.528	211.509
-28	320	492.038	426.566	304.906	291.547	365.132	258.604	177.321	294.943	214.075	311.66	354.415	323.774	167.509	193.019	204.906	414.755	238.453	282.075	228.868			456.038	275.623	316.302	391.019	229.925	387.434	345.774	344.943	202	202.906	219.736	244.038	209.208	223.774	192.981
-26	269.736	502.906	420.792	325.585	307.623	344.34	238.453	204.604	259.094	218.377	330.075	390.981	373.849	149.774	204.151	216.453	461.358	238.528	228.075	226.717			400.943	317.245	376.604	441.472	288	294.679	394.755	370	270.642	168.151	182.038	277.811	210.075	227.811	184.453
-24	320.34	541.434	457.887	312.075	292.604	321.736	234.302	204.189	236.755	229.962	307.245	418.264	285.434	169.472	172.83	289.925	361.358	220.377	256.075	245.736			430.075	290.038	307.472	409.774	179.925	240.491	364.792	321.736	239.245	180.302	210.113	249.245	202.642	196.264	186.377
-22	325.585	484.792	448.189	344.528	304.491	318.642	272.792	181.811	253.396	230.755	253.547	414.906	253.132	219.585	173.509	242.453	331.434	199.925	226.038	212.528			413.396	235.245	284.226	308.226	174.717	261.208	376.528	316.528	248.792	178.755	215.547	242.491	180.113	190.981	161.66
-20	368.868	448.528	368.151	368.189	300.792	245.434	237.019	199.396	222.264	256.189	222.981	381.208	287.962	163.019	184.189	227.774	306.264	192.868	189.585	212.642			382.528	233.283	264.34	248.264	240.264	237.849	420.642	270.453	251.509	203.811	202.226	210.264	198.792	164	188.906
-18	246.075	427.358	391.208	366.906	276.717	227.396	292.906	185.358	227.434	280.981	230.226	311.094	284.302	140.075	177.547	196.075	325.17	175.057	313.925	215.057			350	236.717	197.698	209.132	171.208	252.264	376.981	249.547	239.057	186.717	155.774	264.679	197.358	142.075	199.698
-16	245.472	388.906	340.151	320.151	284.34	218.453	202.528	151.887	204.604	257.547	235.66	280.566	261.057	134.415	155.057	198.34	328.792	185.132	193.321	198.943			326.302	196.83	235.585	231.887	168.377	220.038	393.623	234.566	180.642	194.113	154.528	232.415	200.302	159.472	176.981
-14	227.547	311.849	252.604	296	199.887	181.094	184.075	148.679	189.547	212.906	216.642	187.472	227.019	151.245	162.038	219.321	302.264	194.566	127.925	157.774			362.415	205.019	302.981	213.509	150.792	200.943	370.189	188.113	177.585	143.585	139.17	146.943	141.208	152.642	179.547
-12	236.83	307.321	208.34	276.075	193.132	161.472	139.774	133.925	179.434	166.528	200.226	176.868	186.302	154.113	136.528	173.019	219.434	151.849	131.774	144.151			240.189	222.528	225.774	194.226	125.925	150.075	281.585	161.321	150.377	115.283	123.962	140.113	115.358	156.151	197.811
-10	244.264	281.208	216.189	232.83	206.34	163.66	187.057	136.226	170.377	190.491	216.038	157.358	182.868	163.925	135.283	151.019	199.472	133.509	127.887	144			203.321	203.208	245.547	159.925	128.189	162.113	311.472	181.509	143.396	111.509	126.453	152.83	136.453	156.34	190.604
-8	223.321	267.774	193.358	262.868	182.038	189.887	137.774	136	182.528	175.509	205.585	170.83	186.377	187.358	157.472	157.396	145.321	120.566	121.094	148.302			189.623	217.17	263.736	161.283	117.66	179.434	327.585	182.189	152.755	113.434	127.094	161.019	141.245	166.642	204.113
-6	217.811	290.679	224.151	216.566	192.755	244.377	161.396	149.132	190.151	199.774	229.132	226.302	217.811	220.943	140.302	142.906	170.528	134.755	130.528	162.151			238.981	238.302	244.528	168.113	133.208	199.094	364.566	177.17	138.528	164.226	133.849	203.811	177.208	159.283	164.302
-4	212.642	298.868	263.509	244.113	181.396	236.717	159.585	140.302	226.038	192.868	205.887	242.679	192.075	248.83	195.321	180.491	199.434	150.83	125.019	160.377			246.83	234.302	247.585	182.868	139.585	239.132	400.981	280.415	184.717	152.642	149.66	230.226	169.321	182.113	193.66
-2	210.377	320	256.528	247.358	186.528	218.981	177.585	135.472	221.019	228.189	169.208	245.887	183.019	220.302	184.453	182.528	188.151	154.415	135.283	150.83			269.472	253.698	202.038	134.189	136.528	237.698	409.849	307.094	250.34	154.453	161.472	231.736	194	170.566	146.83
0	179.396	292.226	263.849	203.698	167.321	224.679	165.66	139.208	184.83	212.075	204.642	217.509	170.792	205.132	181.698	194.717	199.321	137.623	131.094	147.208			218.943	229.472	215.094	145.925	142.943	148.453	404.717	281.585	215.094	163.925	179.132	201.849	169.962	161.774	155.623

## Sheet: Fig2E-Source Data
Metric rank (µm)	R1 Control (division time min)
	Pupae 1		Pupae 2		Pupae 3		Pupae 4		Pupae 5		Pupae 6		Pupae 7		Pupae 8		Pupae 9		Pupae 10				Metric rank (µm)	R2 Control (division time min)																						Metric rank (µm)	R3 Control (division time min)
	G	D	G	D	G	D	G	D	G	D	G	D	G	D	G	D	G	D	G	D				Pupae 1		Pupae 2		Pupae 3		Pupae 4		Pupae 5		Pupae 6		Pupae 7		Pupae 8		Pupae 9		Pupae 10					Pupae 1		Pupae 2
-330																								G	D	G	D	G	D	G	D	G	D	G	D	G	D	G	D	G	D	G	D				G	D	G
-300																							-330																							-330
-270																							-300																							-300
-240																							-270																							-270
-210			72	132						129		114											-240																							-240
-180			60	24	147	162	114	147	123	99		96	192	213			135			153			-210																							-210
-150	90	108	42	42	123	165	42	189	57	45	72	183	120	144	72	99	51	60		108			-180																							-180
-120	93	45	72	96	48	96	6	51	99	108	135	81	57	75	90	96	15	48	63	48			-150																							-150
-90	24	57	48	12	48	39	60	66	3	51	36	84	9	66	39	54	6	57	96	93			-120	45													111									-120			72
-60	99	45	24	33	69	66	21	84	54	69	54	42	0	24	60	48	36	69	24	27			-90	27	21		81		93		57	108	81	48			75			15	75		123			-90		57	69
-30	21	15	18	0	105	15	9	33	33	21	30	30	21	21	36	81	18	63	9	18			-60	6	42		54	45	3	117	102	51	54	126	81	42	21		36	12	30		54			-60		12	30
0	0	0	0	0	0	0	0	0	0	0	0	0	0	0	0	0	0	0	0	0			-30	24	45	6	66	36	21	36	111	87	153	63	36	84	24	21	3	15	12	45	51			-30	90	51	48
30	15	9	18	54	54	42	45	15	15	57	120	66	3	33	99	9	12	51	18	51			0	0	0	0	0	0	0	0	0	0	0	0	0	0	0	0	0	0	0	0	0			0	0	0	0
60	9	81	72	162	84	6	66	24	60	108	27	63	27	162	24	3	27	36	6	69			30	75	90	126	12	9	3	66	54	45	30	39	63	24	24	18	45	21	27	9	15			30	75	48	51
90	48	48	189	45	66	144	33	177	81	108	96	165	48	63	57	48	30	81	144	66			60	75	9	30	33	69	27	30	72	24	9	78	27	36	12	30	33	9	30	60	18			60	66	60	48
120	24	63		33	114	93	81	72	57	114	78	168	63	126	63	54	132	60	42	129			90	75	84	30	36	54	78	54	99		75	87	30	15	57	9	63	45	81	21	36			90	51	69	99
150	135	48		72	126	150		57	129	123	66	123	189	75	87	69	60	75	3				120	99	102	66	30	51	90	66	120		105		51	24		21	39	78	18	129	66			120	57	120	96
180		87		117		108		165	141		108				129	57	69	120	33				150			39	96	99		117	141		261		93	36		21		81	66					150	87		135
210		96				162					159								123				180			27									117			75								180	156
240																							210																							210
270																							240																							240
300																							270																							270
330																							300																							300
360																							330																							330
390																							360																							360
																							390																							390
Metric rank (µm)	R1 rac1N17 (division time min)
	Pupae 1		Pupae 2		Pupae 3		Pupae 4		Pupae 5		Pupae 6												Metric rank (µm)	R2 rac1N17 (division time min)																						Metric rank (µm)	R3 rac1N17 (division time min)
	G	D	G	D	G	D	G	D	G	D	G	D											-390	Pupae 1		Pupae 2		Pupae 3		Pupae 4		Pupae 5		Pupae 6												-390	Pupae 1		Pupae 2
-330																							-360	G	D	G	D	G	D	G	D	G	D	G	D											-360	G	D	G
-300																							-330																							-330
-270																							-300																							-300
-240																							-270																							-270
-210																							-240																							-240
-180							63	15															-210																							-210
-150		33		36			12	27			9	72											-180																							-180
-120	66	42		57			9	18			36	66											-150																							-150
-90	33	9		24	72		18	3		96	75	39											-120		42																					-120
-60	12	21		42	51		51	3	48	51	18	21											-90	33	18	33			63	78		45														-90	30	30
-30	15	9	99	6	81	33	9	51	33	21	18	24											-60	24	27	33	18	18	81	63	15	54														-60	12	12	138
0	0	0	0	0	0	0	0	0	0	0	0	0											-30	6	63	102	0	18	57	33	0	51	42	9												-30	0	42	39
30	9	39	51	45	45	12	24	21	99	36	30	6											0	0	0	0	0	0	0	0	0	0	0	0												0	0	0	0
60	81	33	21	45	12	6	54		51	48	93	15											30	6	27	0	45	105	12	75	12	66	33	30												30	15	15	42
90	75	48	30	81	63	24	24		45	60	33	54											60	42	57	12	51	6	54	69	18	57	3	48												60		18	42
120	87	45	12	12	75	3			6	117		60											90			24	51		90				18	21												90		54	66
150	54	51	54		42	15			48	84		84											120				51		42				3	48												120		99
180		21	60		60	39			99	111													150																							150
210			45			72			96	75													180																							180
240			78			39																	210																							210
270																							240																							240
300																							270																							270
330																							300																							300
360																							330																							330
390																							360																							360
																							390																							390
Genotype	Control
Linear regression	Row 1		Row 2		Row 3
	Anterior	Posterior	Anterior	Posterior	Anterior	Posterior
Best-fit values ± SE
Slope	-0.5417	0.4621	-0.3621	0.3426	-0.4985	0.5635
1/slope	-1.846	2.164	-2.762	2.919	-2.006	1.775
Speed (µm/min)	1.846	2.164	2.762	2.919	2.006	1.775
R square	0.9068	0.9202	0.9639	0.7321	0.6585	0.9426
Equation	Y = -0,5417*X + 10,85	Y = 0,4621*X + 29,66	Y = -0,3621*X + 33,71	Y = 0,3426*X + 25,00	Y = -0,4985*X + 33,19	Y = 0,5635*X + 20,02
Genotype	Rac1N17
Linear regression	Row 1		Row 2		Row 3
	Anterior	Posterior	Anterior	Posterior	Anterior	Posterior
Best-fit values ± SE
Slope	-0,02748 ± 0,04033	0,1483 ± 0,03153	-0,04935 ± 0,04737	-0,05545 ± 0,03652	-0,1102 ± 0,03911	0,3235 ± 0,127
1/slope	-36.4	6.741	-20.26	-18.03	-9.073	3.091
Speed (µm/min)	36.4	6.741	20.26	18.03	9.073	3.091
R square	0.104	0.7867	0.2134	0.4346	0.7988	0.1603
Equation	Y = -0,02748*X + 33,54	Y = 0,1483*X + 32,61	Y = -0,04935*X + 34,76	Y = -0,05545*X + 41,41	Y = -0,1102*X + 34,55	Y = 0,3235*X + 20,39
[truncated: 19 more columns]
