# Supplementary material for: A neural progenitor mitotic wave is required for asynchronous axon outgrowth and morphology
Source: eLife. 2022 Mar 7;11:e75746. doi: 10.7554/eLife.75746 (PMC8933001; doi:10.7554/eLife.75746)
Supplement: Figure 3—figure supplement 3—source data 1. [file elife-75746-fig3-figsupp3-data1.xlsx]

## Sheet: Figure 3 - figure supplement 3A
Metric rank (µm)	R1 Control (division time min)																																	Fit
-390
-360
-330
-300
-270
-240
-210								63		72							117											171			60	84		89.98
-180								78	60	63			24				33				90	123					63	33			60	165		85.9719
-150								60	3	144			24	90	48	24	54				42	95					43	66			51	109		81.1623
-120							141	72	9	3	114		0	27	48	33	99				30	33	81				51	123			36	144		75.1503
-90			246	51			36	33	84	60	33		42	12	21	24	6		60	33	6	99	69	78			9	51		153	36	18		67.2345
-60	57	36	90	36	156	132	36	45	21	6	24		36	102	42	102	84	24	36	24	60	36	63	39		21	63	33	66	75	51	66		56.012
-30	33	51	15	24	72	57	3	27	84	12	147	24	87	36	72	15	42	27	9	9	84	84	60	60	78	24	3	6	12	159	24	12		37.1743
0	0	0	0	0	0	0	0	0	0	0	0	0	0	0	0	0	0	0	0	0	0	0	0	0	0	0	0	0	0	0	0	0		0
30	9	15	75	87	30	45	138	54	15	33	0	33	18	150	24	9	123	24	66	48	51	15	102	39	30	30	6	0	33	63	72	12		39.1784
60	33	30	30	12	3	75	12	87	87	27	15	24	60	12	177	24	60	15	18	30	24	42	45	24	66	21	21	39	9	54	30	21		55.1102
90	27	6	24	9	57	6	42	120	42	48	48	24	105	21	9	15	39	84	60	24	15	84	72	33	93	132	12	33	93	129	30	99		66.5331
120	36	27	78	108	39	18	66	162	72	69	33	36	51	159	90	120	36	27	21	36	198	72	93	159	15	54	42	84	9	39	105	21		74.3487
150	54	30	36	3	66	63	51	231	96	12	78	75	129	69	24	48	42	12	51	117	57	30	69	24	126	18	90	72	36	57	54	27		80.2605
180	0	90	102	15	42	99	108			186	81	69	18	63	39	45	147	45	90	36	60	120	129	69	63	27	48	132	33	21	60	45		84.7695
210	66	57	87	81	57	84	75				75	51	84	75	87	117	72	15	96	129	135	99	102	42	117	90	123	114	21	81	87	48		89.0782
240	63	60	69	96	105	99	138					171		132	132	84	75	75	90	63	60		93	78	75	123	135		99	144				92.5852
270	96	90	219	48	78	102						63			57	144		180	147	114	111			84	102	72			75	72				95.7916
300	90		96	45	51	159						120			138			63	147						156	48			42	147				98.0962
330			201	78	105	204						132						48							105				99	81				100.401
360

## Sheet: Figure 3 - figure supplement 3B
Metric rank (µm)		R1 Dl7 /+																Fit
-390
-360
-330
-300												60		60				65.4309
-270											96	48	96	48				64.6293
-240											51	60	51	60				64.0281
-210										132	18	72	18	72	33			63.7275
-180					87	78		78	108	150	3	39	3	39	24			61.523
-150			3		87	75		60	18	36	51	24	51	24	48			58.8176
-120			63		6	54		60	12	66	3	42	3	42	6			53.9078
-90		21	27		81	75		27	81	21	21	9	21	9	27			49.3988
-60		6	30		60	15		48	24	15	12	72	12	72	24	18		40.8818
-30	87	39	150	105	24	39		30	60	36	12	18	12	18	18	6		28.7575
0	0	0	0	0	0	0	0	0	0	0	0	0	0	0	0	0		0
30	3	33	3	33	18	33	42	30	45	54	18	12	18	12	69	42		30.1603
60	30	3	84	99	48	21	36	63	48	69	24	51	24	51	30	6		42.8858
90	18	9	3	12	51	9	33	51	6	96		51		51	57	30		50.2004
120	54	21	3	66	51	60	33	84	45	54		21		21	66	18		55.2104
150	30	24	24	12	54	39	60	84	48	126		42		42	42	27		59.4188
180	63	24	6	60	57		39	114	78	129					18	24		61.9238
210	54	48	51	24			99								33	21		63.4269
240	51	84	12	36			63									27		63.7275
270	69			72			123									54		64.6293
300				69			123											65.8317
330				81			87											70.8417
360
390

## Sheet: Figure 3 - figure supplement 3C
Metric rank (µm)	R1 scaBP2 /+ (division time min)																					Fit
-390
-360
-330
-300
-270
-240							108		144		51											78.7575
-210						165	81		87	96	27								93	81		75.8517
-180	54			81	153	135	42		60	72	3	72		93					54	66		72.1443
-150	21		33	75	90	81	24		39	66	9	72	75	87	57	108	81		24	63		67.4349
-120			114	90	63	36	21	90	39	48	9		93	75	108	93	60	162	27	42		62.1242
-90	15	123	33	18	72	27	18	69	60	75	24	3	108	45	36	21	36	126	27	51		55.7114
-60	39	96	63	99	0	69	18	45	27	69	33	39	21	51	24	63	18	102	54	30		46.8938
-30	75	66	3	9	75	12	6		60	57	21	117	9	36	18		18	96	24	12		32.8657
0	0	0	0	0	0	0	0	0	0	0	0	0	0	0	0	0	0	0	0	0		0
30	45	84	27	36	39	21	129	117	27	69	12	18	12	15	12	33	75	90	15	12		31.4629
60	9	60	9	27	126	0	45	6	60	78	81	48	30	84	9	78	12	93	27	6		45.3908
90	90	189	51	54	24	15	153	9	72	72	18	18	27	57	78	48	54	54	57	33		54.3086
120	60	18	36	87	30	105	33	21	162	57	96	18	27	81	60	51	27	54		48		61.8236
150	36	21	114	150	30	54	30	33		90	48	39	84	75	126	75	66	39		6		66.7335
180	78	54			144	27		57		93	42	51	72	93		105	84	42		36		71.2425
210		33			39	45		30		81		42	171					123		81		74.6493
240		141			84	48		72				27						99				77.6553
270		72						81				141						153				97.3747
300
330
360
390

## Sheet: Figure 3 - figure supplement 3D
Metric rank (µm)	Dl7 /+ ; scaBP2 /+																		Fit
-390
-360
-330
-300
-270
-240		69	45	51						96			48	18					54.509
-210		42	48	33				93		18			48	48	63				56.2124
-180		36	54	24	33	39		87		48			18	36	111				55.9118
-150		81	57	51	18	72		51		42		3	102	48	42	60			55.2104
-120	93	36	72	12	72	45	78	63	45	21		33	33	15	45	105			53.7074
-90	36	6	42	72	72	69	21	39	144	6		15	30	30	93	111			52.505
-60	63	69	93	36	66	36	75	96	48	30	114	21	6	51	39	18			46.5932
-30	81	6	63	15	21	6	42	15	54	6	114	96	0	33	33	102			33.0661
0	0	0	0	0	0	0	0	0	0	0	0	0	0	0	0	0			0
30	90	69	33	15	45	6	39	174	90	24	51	54	45	51	24	15			32.7655
60	18	63	54	48	39	24	9	15	66		24	0	15	117	63	48			45.6914
90	105	57	69	27	81	60	39	84	51		9	51	21	84	48	12			51.7034
120	69	45		45		45	42	39	45		24	33	75		57				55.3106
150	51	69		60		42	141		48		9	57	36		78				53.9078
180	99						30				9	27	54		66				54.008
210	114										15		84						53.8076
240	66										69								52.9058
270	66										36								54.3086
300	78										21								58.2164
330
360
390

## Sheet: Figure 3 - figure supplement 3E
	Genotype	Row	µ	r
	scaBP2/+	1	0.527315	37.9226
	Dl/+	1	0.480949	38.3411
	scaBP2/+; Dl / +	1	0.374435	37.3584
