# Supplementary material for: A neural progenitor mitotic wave is required for asynchronous axon outgrowth and morphology
Source: eLife. 2022 Mar 7;11:e75746. doi: 10.7554/eLife.75746 (PMC8933001; doi:10.7554/eLife.75746)
Supplement: Figure 3—source data 1. [file elife-75746-fig3-data1.xlsx]

## Sheet: Fig3B-Source Data
Figure 3B
Metric rank (µm)	R1 Control (division time min)																																	Metric rank (µm)		R2 Control (division time min)
-390	Pupae 1		Pupae 2		Pupae 3		Pupae 4		Pupae 5		Pupae 6		Pupae 7		Pupae 8		Pupae 9		Pupae 10		Pupae 11		Pupae 12		Pupae 13		Pupae 14		Pupae 15		Pupae 16			-390	Pupae 1		Pupae 2		Pupae 3		Pupae 4		Pupae 5		Pupae 6		Pupae 7		Pupae 8
-360	G	D	G	D	G	D	G	D	G	D	G	D	G	D	G	D	G	D	G	D	G	D	G	D	G	D	G	D	G	D	G	D		-360	G	D	G	D	G	D	G	D	G	D	G	D	G	D	G
-330																																		-330
-300																																		-300
-270																																		-270
-240																																		-240
-210								63		72							117											171			60	84		-210
-180								78	60	63			24				33				90	123					63	33			60	165		-180
-150								60	3	144			24	90	48	24	54				42	95					43	66			51	109		-150
-120							141	72	9	3	114		0	27	48	33	99				30	33	81				51	123			36	144		-120		24			18							87			48
-90			246	51			36	33	84	60	33		42	12	21	24	6		60	33	6	99	69	78			9	51		153	36	18		-90	51	27			96			72		51		12	90		24
-60	57	36	90	36	156	132	36	45	21	6	24		36	102	42	102	84	24	36	24	60	36	63	39		21	63	33	66	75	51	66		-60	18	21	90		18			117	51	45	6	12	33	78	18
-30	33	51	15	24	72	57	3	27	84	12	147	24	87	36	72	15	42	27	9	9	84	84	60	60	78	24	3	6	12	159	24	12		-30	12	9	66	15	21	24	15	45	18	21	3	81	66	48	24
0	0	0	0	0	0	0	0	0	0	0	0	0	0	0	0	0	0	0	0	0	0	0	0	0	0	0	0	0	0	0	0	0		0
30	9	15	75	87	30	45	138	54	15	33	0	33	18	150	24	9	123	24	66	48	51	15	102	39	30	30	6	0	33	63	72	12		30	57	57	48	63	42	48	84	24	129	3	9	21	18	18	51
60	33	30	30	12	3	75	12	87	87	27	15	24	60	12	177	24	60	15	18	30	24	42	45	24	66	21	21	39	9	54	30	21		60	30	84	57	30	63	12	33	75	51	6	36	93	36	24	36
90	27	6	24	9	57	6	42	120	42	48	48	24	105	21	9	15	39	84	60	24	15	84	72	33	93	132	12	33	93	129	30	99		90	42	33	57	33	75	93	45	45	36	51	27	42	60	81	75
120	36	27	78	108	39	18	66	162	72	69	33	36	51	159	90	120	36	27	21	36	198	72	93	159	15	54	42	84	9	39	105	21		120	9	42	78	69	66	12	48	84	48	18	36		45	72	93
150	54	30	36	3	66	63	51	231	96	12	78	75	129	69	24	48	42	12	51	117	57	30	69	24	126	18	90	72	36	57	54	27		150	6	78	60	75	135	87	63	42	81	126	102		66	27	132
180	0	90	102	15	42	99	108			186	81	69	18	63	39	45	147	45	90	36	60	120	129	69	63	27	48	132	33	21	60	45		180	57	102	60	39		39	78	90	120	42			66	57	123
210	66	57	87	81	57	84	75				75	51	84	75	87	117	72	15	96	129	135	99	102	42	117	90	123	114	21	81	87	48		210	72	102	90	81		75	90	174	144	72			126	63
240	63	60	69	96	105	99	138					171		132	132	84	75	75	90	63	60		93	78	75	123	135		99	144				240	72	102	99	138		84	120		144	159			75	105
270	96	90	219	48	78	102						63			57	144		180	147	114	111			84	102	72			75	72				270						96	165		204	69				105
300	90		96	45	51	159						120			138			63	147						156	48			42	147				300						120
330			201	78	105	204						132						48							105				99	81				330
360																																		360
390																																		390
Metric rank (µm)	R1 scaBP2 (division time min)																			Metric rank (µm)	R2 scaBP2 (division time min)																	Metric rank (µm)	R3 scaBP2 (division time min)
	Pupae 1		Pupae 2		Pupae 3		Pupae 4		Pupae 5		Pupae 6		Pupae 7		Pupae 8		Pupae 9				Pupae 1		Pupae 2		Pupae 3		Pupae 4		Pupae 5		Pupae 6		Pupae 7		Pupae 8				Pupae 1		Pupae 2		Pupae 3		Pupae 4		Pupae 5		Pupae 6
	G	D	G	D	G	D	G	D	G	D	G	D	G	D	G	D	G	D			G	D	G	D	G	D	G	D	G	D	G	D	G	D	G	D			G	D	G	D	G	D	G	D	G	D	G
-286																				-286																		-286
-264																				-264																		-264
-242																				-242																		-242
-220			83				27				15									-220																		-220
-198	63		84				60				54	42								-198																		-198
-176	81		93	63	60		42				33	30						69		-176																		-176
-154	51		93	96	67		18	60		114	12	18	42	24	18			63		-154																		-154
-132	66	69	129	72	76		6	30		120	24	15	42	36	9			45		-132				90					30		30							-132					70.5	54	111		60		81
-110	57	69	84	93	61		6	72		96	33	33	30	0	30			30		-110	123	69		108			78	102	21		33		21					-110			51	54	84	34.5	18		66	111	69
-88	21	117	78	90	72		3	54		93	18	3	30	48	24			48		-88	66	69	69	102			63	48	36	75	21		15			39		-88	174		9	54	69	48	36	36	51	99	45
-66	48	24	126	51	54	77	27	93	111	39	24	9	9	39	15		111	33		-66	21	15	27	96			45	51	24	51	18		9	39		57		-66	183	87	63	90	76.5	52.5	24	57	21	66	18
-44	18	48	33	57	18	87	81	27	54	90	33	27	6	39	12	27	126	21		-44	72		51	60			60	42	21	36	6		27	42		24		-44	105	96	57	3	87	72	105	39	63	45	6
-22	0	63	45	54	54	78	3	9	90	78	21	18	12	18	39	18	54	45		-22	48	21	45	99		18	21	102	39	15	9	33	18	36	15	48		-22	21	36	75	63	48	69	45	9	69	12	15
0	0	0	0	0	0	0	0	0	0	0	0	0	0	0	0	0	0	0		0	0	0	0	0	0	0	0	0	0	0	0	0	0	0	0	0		0	0	0	0	0	0	0	0	0	0	0	0
22	33	12	75	33	31	0	9	3	84	75	24	18	12	33	24	36	72	45		22	57	48	24	111	15	15	15	33	24	33	42	9	27	33	3	36		22	63	21	48	90	61.5	99	66	60	54	9	9
44	45	15	60	21	46	99	24	18	75	48	45	27	6	27	24	93	18	27		44	39	66	12	90	27	6	24	51	33	27	57	3		12	3	39		44	66	18	48	36	72		81	12	66	21	33
66	96	9	93	48	30	78	21	60	57	66	39	15	9	12	6	51	84	30		66	51	51	63	138	15	33	42	60	42	45	54	6		18	3	36		66	45	3	66	63	51		81	54	66	39	51
88	18	21	102	60	51	68	33	15	57	84	30	3	39	42	3	45	45	30		88	96	141	39	111	15	24	30	48	36	51	54	3		42	27	45		88	33	51	39	63	61.5		108	84	87	6	15
110	39	9	63	60	40	68	18	135	30	9	27	48	18	60	48	15	57	30		110	66	66	51	129	45	42	48	39		36	39	9		33	27	75		110	105	51	36	99	67.5		96	84	87	60	33
132	30	27	48	57	0	72	51	45	24	45		39	12	63	36	54	57	30		132	66	54	48	93	30	69	84	87		51	42	36			33	84		132	60	42	105	36	90		105	84	87	42	30
154	42	33	75	51	55	57	120	69	9	60		57	24	63	39	42	24	18		154	93	69	45		42	72	60	78		54	57	54			45	87		154	93	60	84				99	87	105	39
176	63	75			66	54	96	54	81	75		30			18	3	60	60		176	105	117	63		24	39		81		57		45			45	51		176	78	54	99					90	105
198	21	51			97	54		75	51	3		45			54	9	30	51		198	114	90			48	54				39		39				57		198	108	111
220	63	30			72	59		90	36	51		48				30	30	18		220	132	69			30	60						39				51		220	120	78
242	63	36			72	68		78	18	54		42				6	81	30		242					57	99										75		242	99
264		36				62			24	27						42	48	51		264					30											48		264	126
286						89			39							24	51	60		286																		286	105
308						80			90							63	54	39		308																		308
330									54								39			330																		330
Genotype	Control
Linear regression	Row 1
	Anterior	Posterior
Best-fit values ± SE
Slope	-0,22 ± 0,046	0,284 ± 0,024
1/slope	-4.5	3.521
Speed (µm/min)	4.5	3.521
R square	0,82	0.9342
Equation	Y = -0,22*X + 37	Y = 0,284*X + 26,03
Genotype	scaBP2/scaBP2
Linear regression	Row 1
	Anterior	Posterior
Best-fit values ± SE
Slope	-0,04933 ± 0,03233	0,04986 ± 0,01626
1/slope	-20.27	20.06
Speed (µm/min)	20.27	20.06
R square	0.2254	0.4197
Equation	Y = -0,04933*X + 44,16	Y = 0,04986*X + 37,78
[truncated: 46 more columns]

## Sheet: Fig3C-Source Data
Genotype	Row	µ	r
Control ScaBP2	1	0.505103	37.7074
	2	0.5137	36.1178
	3	0.5418	38.136
ScaBP2	1	0.31375	41.087
	2	0.413846	36.5621
	3	0.334096	39.6177

## Sheet: Fig3D-Source Data
Figure 3D
Metric rank (µm)	R1 Control (division time min)
	Pupae 1		Pupae 2		Pupae 3		Pupae 4		Pupae 5		Pupae 6		Pupae 7		Pupae 8		Pupae 9		Pupae 10		Pupae 11		Pupae 12		Pupae 13		Pupae 14		Pupae 15		Pupae 16
	G	D	G	D	G	D	G	D	G	D	G	D	G	D	G	D	G	D	G	D	G	D	G	D	G	D	G	D	G	D	G	D
-330
-300
-270
-240
-210								63		72							117											171			60	84
-180								78	60	63			24				33				90	123					63	33			60	165
-150								60	3	144			24	90	48	24	54				42	95					43	66			51	109
-120							141	72	9	3	114		0	27	48	33	99				30	33	81				51	123			36	144
-90			246	51			36	33	84	60	33		42	12	21	24	6		60	33	6	99	69	78			9	51		153	36	18
-60	57	36	90	36	156	132	36	45	21	6	24		36	102	42	102	84	24	36	24	60	36	63	39		21	63	33	66	75	51	66
-30	33	51	15	24	72	57	3	27	84	12	147	24	87	36	72	15	42	27	9	9	84	84	60	60	78	24	3	6	12	159	24	12
0	0	0	0	0	0	0	0	0	0	0	0	0	0	0	0	0	0	0	0	0	0	0	0	0	0	0	0	0	0	0	0	0
30	9	15	75	87	30	45	138	54	15	33	0	33	18	150	24	9	123	24	66	48	51	15	102	39	30	30	6	0	33	63	72	12
60	33	30	30	12	3	75	12	87	87	27	15	24	60	12	177	24	60	15	18	30	24	42	45	24	66	21	21	39	9	54	30	21
90	27	6	24	9	57	6	42	120	42	48	48	24	105	21	9	15	39	84	60	24	15	84	72	33	93	132	12	33	93	129	30	99
120	36	27	78	108	39	18	66	162	72	69	33	36	51	159	90	120	36	27	21	36	198	72	93	159	15	54	42	84	9	39	105	21
150	54	30	36	3	66	63	51	231	96	12	78	75	129	69	24	48	42	12	51	117	57	30	69	24	126	18	90	72	36	57	54	27
180	0	90	102	15	42	99	108			186	81	69	18	63	39	45	147	45	90	36	60	120	129	69	63	27	48	132	33	21	60	45
210	66	57	87	81	57	84	75				75	51	84	75	87	117	72	15	96	129	135	99	102	42	117	90	123	114	21	81	87	48
240	63	60	69	96	105	99	138					171		132	132	84	75	75	90	63	60		93	78	75	123	135		99	144
270	96	90	219	48	78	102						63			57	144		180	147	114	111			84	102	72			75	72
300	90		96	45	51	159						120			138			63	147						156	48			42	147
330			201	78	105	204						132						48							105				99	81
360
390
Metric rank (µm)		R1 Dl7 /+
	Pupae 1		Pupae 2		Pupae 3		Pupae 4		Pupae 5		Pupae 6		Pupae 7		Pupae 8
	G	D	G	D	G	D	G	D	G	D	G	D	G	D	G	D
-330
-300												60		60
-270											96	48	96	48
-240											51	60	51	60
-210										132	18	72	18	72	33
-180					87	78		78	108	150	3	39	3	39	24
-150			3		87	75		60	18	36	51	24	51	24	48
-120			63		6	54		60	12	66	3	42	3	42	6
-90		21	27		81	75		27	81	21	21	9	21	9	27
-60		6	30		60	15		48	24	15	12	72	12	72	24	18
-30	87	39	150	105	24	39		30	60	36	12	18	12	18	18	6
0	0	0	0	0	0	0	0	0	0	0	0	0	0	0	0	0
30	3	33	3	33	18	33	42	30	45	54	18	12	18	12	69	42
60	30	3	84	99	48	21	36	63	48	69	24	51	24	51	30	6
90	18	9	3	12	51	9	33	51	6	96		51		51	57	30
120	54	21	3	66	51	60	33	84	45	54		21		21	66	18
150	30	24	24	12	54	39	60	84	48	126		42		42	42	27
180	63	24	6	60	57		39	114	78	129					18	24
210	54	48	51	24			99								33	21
240	51	84	12	36			63									27
270	69			72			123									54
300				69			123
330				81			87
360
390
Genotype	Control		Dl7/+
Linear regression	Row 1		Row 1
	Anterior	Posterior	Anterior	Posterior
Best-fit values ± SE
Slope	-0,22 ± 0,046	0,284 ± 0,024	-0,1325 ± 0,03879	0,1448 ± 0,02417
1/slope	-4.5	3.521	-7.548	6.906
Speed (µm/min)	4.5	3.521	7.548	6.906
R square	0,82	0.9342	0.5932	0.7995
Equation	Y = -0,22*X + 37	Y = 0,284*X + 26,03	Y = -0,1325*X + 28,93	Y = 0,1448*X + 25

## Sheet: Fig3E-Source Data
Figure 3E
Metric rank (µm)	R1 Control (division time min)
	Pupae 1		Pupae 2		Pupae 3		Pupae 4		Pupae 5		Pupae 6		Pupae 7		Pupae 8		Pupae 9		Pupae 10		Pupae 11		Pupae 12		Pupae 13		Pupae 14		Pupae 15		Pupae 16
	G	D	G	D	G	D	G	D	G	D	G	D	G	D	G	D	G	D	G	D	G	D	G	D	G	D	G	D	G	D	G	D
-330
-300
-270
-240
-210								63		72							117											171			60	84
-180								78	60	63			24				33				90	123					63	33			60	165
-150								60	3	144			24	90	48	24	54				42	95					43	66			51	109
-120							141	72	9	3	114		0	27	48	33	99				30	33	81				51	123			36	144
-90			246	51			36	33	84	60	33		42	12	21	24	6		60	33	6	99	69	78			9	51		153	36	18
-60	57	36	90	36	156	132	36	45	21	6	24		36	102	42	102	84	24	36	24	60	36	63	39		21	63	33	66	75	51	66
-30	33	51	15	24	72	57	3	27	84	12	147	24	87	36	72	15	42	27	9	9	84	84	60	60	78	24	3	6	12	159	24	12
0	0	0	0	0	0	0	0	0	0	0	0	0	0	0	0	0	0	0	0	0	0	0	0	0	0	0	0	0	0	0	0	0
30	9	15	75	87	30	45	138	54	15	33	0	33	18	150	24	9	123	24	66	48	51	15	102	39	30	30	6	0	33	63	72	12
60	33	30	30	12	3	75	12	87	87	27	15	24	60	12	177	24	60	15	18	30	24	42	45	24	66	21	21	39	9	54	30	21
90	27	6	24	9	57	6	42	120	42	48	48	24	105	21	9	15	39	84	60	24	15	84	72	33	93	132	12	33	93	129	30	99
120	36	27	78	108	39	18	66	162	72	69	33	36	51	159	90	120	36	27	21	36	198	72	93	159	15	54	42	84	9	39	105	21
150	54	30	36	3	66	63	51	231	96	12	78	75	129	69	24	48	42	12	51	117	57	30	69	24	126	18	90	72	36	57	54	27
180	0	90	102	15	42	99	108			186	81	69	18	63	39	45	147	45	90	36	60	120	129	69	63	27	48	132	33	21	60	45
210	66	57	87	81	57	84	75				75	51	84	75	87	117	72	15	96	129	135	99	102	42	117	90	123	114	21	81	87	48
240	63	60	69	96	105	99	138					171		132	132	84	75	75	90	63	60		93	78	75	123	135		99	144
270	96	90	219	48	78	102						63			57	144		180	147	114	111			84	102	72			75	72
300	90		96	45	51	159						120			138			63	147						156	48			42	147
330			201	78	105	204						132						48							105				99	81
360
390
Metric rank (µm)	R1 scaBP2 /+ (division time min)
	Pupae 1		Pupae 2		Pupae 3		Pupae 4		Pupae 5		Pupae 6		Pupae 7		Pupae 8		Pupae 9		Pupae 10
	G	D	G	D	G	D	G	D	G	D	G	D	G	D	G	D	G	D	G	D
-330
-300
-270
-240							108		144		51
-210						165	81		87	96	27								93	81
-180	54			81	153	135	42		60	72	3	72		93					54	66
-150	21		33	75	90	81	24		39	66	9	72	75	87	57	108	81		24	63
-120			114	90	63	36	21	90	39	48	9		93	75	108	93	60	162	27	42
-90	15	123	33	18	72	27	18	69	60	75	24	3	108	45	36	21	36	126	27	51
-60	39	96	63	99	0	69	18	45	27	69	33	39	21	51	24	63	18	102	54	30
-30	75	66	3	9	75	12	6		60	57	21	117	9	36	18		18	96	24	12
0	0	0	0	0	0	0	0	0	0	0	0	0	0	0	0	0	0	0	0	0
30	45	84	27	36	39	21	129	117	27	69	12	18	12	15	12	33	75	90	15	12
60	9	60	9	27	126	0	45	6	60	78	81	48	30	84	9	78	12	93	27	6
90	90	189	51	54	24	15	153	9	72	72	18	18	27	57	78	48	54	54	57	33
120	60	18	36	87	30	105	33	21	162	57	96	18	27	81	60	51	27	54		48
150	36	21	114	150	30	54	30	33		90	48	39	84	75	126	75	66	39		6
180	78	54			144	27		57		93	42	51	72	93		105	84	42		36
210		33			39	45		30		81		42	171					123		81
240		141			84	48		72				27						99
270		72						81				141						153
300
330
360
390
Genotype	Control		scaBP2/+
Linear regression	Row 1		Row 1
	Anterior	Posterior	Anterior	Posterior
Best-fit values ± SE
Slope	-0,22 ± 0,046	0,284 ± 0,024	-0,2487 ± 0,05619	0,2285 ± 0,03891
1/slope	-4.5	3.521	-4.022	4.377
Speed (µm/min)	4.5	3.521	4.022	4.377
R square	0,82	0.9342	0.1488	0.8312
Equation	Y = -0,22*X + 37	Y = 0,284*X + 26,03	Y = -0,2487*X + 31,15	Y = 0,2285*X + 32,13

## Sheet: Fig3F-Source Data
Figure 3F
Metric rank (µm)	R1 Control (division time min)
	Pupae 1		Pupae 2		Pupae 3		Pupae 4		Pupae 5		Pupae 6		Pupae 7		Pupae 8		Pupae 9		Pupae 10		Pupae 11		Pupae 12		Pupae 13		Pupae 14		Pupae 15		Pupae 16
	G	D	G	D	G	D	G	D	G	D	G	D	G	D	G	D	G	D	G	D	G	D	G	D	G	D	G	D	G	D	G	D
-330
-300
-270
-240
-210								63		72							117											171			60	84
-180								78	60	63			24				33				90	123					63	33			60	165
-150								60	3	144			24	90	48	24	54				42	95					43	66			51	109
-120							141	72	9	3	114		0	27	48	33	99				30	33	81				51	123			36	144
-90			246	51			36	33	84	60	33		42	12	21	24	6		60	33	6	99	69	78			9	51		153	36	18
-60	57	36	90	36	156	132	36	45	21	6	24		36	102	42	102	84	24	36	24	60	36	63	39		21	63	33	66	75	51	66
-30	33	51	15	24	72	57	3	27	84	12	147	24	87	36	72	15	42	27	9	9	84	84	60	60	78	24	3	6	12	159	24	12
0	0	0	0	0	0	0	0	0	0	0	0	0	0	0	0	0	0	0	0	0	0	0	0	0	0	0	0	0	0	0	0	0
30	9	15	75	87	30	45	138	54	15	33	0	33	18	150	24	9	123	24	66	48	51	15	102	39	30	30	6	0	33	63	72	12
60	33	30	30	12	3	75	12	87	87	27	15	24	60	12	177	24	60	15	18	30	24	42	45	24	66	21	21	39	9	54	30	21
90	27	6	24	9	57	6	42	120	42	48	48	24	105	21	9	15	39	84	60	24	15	84	72	33	93	132	12	33	93	129	30	99
120	36	27	78	108	39	18	66	162	72	69	33	36	51	159	90	120	36	27	21	36	198	72	93	159	15	54	42	84	9	39	105	21
150	54	30	36	3	66	63	51	231	96	12	78	75	129	69	24	48	42	12	51	117	57	30	69	24	126	18	90	72	36	57	54	27
180	0	90	102	15	42	99	108			186	81	69	18	63	39	45	147	45	90	36	60	120	129	69	63	27	48	132	33	21	60	45
210	66	57	87	81	57	84	75				75	51	84	75	87	117	72	15	96	129	135	99	102	42	117	90	123	114	21	81	87	48
240	63	60	69	96	105	99	138					171		132	132	84	75	75	90	63	60		93	78	75	123	135		99	144
270	96	90	219	48	78	102						63			57	144		180	147	114	111			84	102	72			75	72
300	90		96	45	51	159						120			138			63	147						156	48			42	147
330			201	78	105	204						132						48							105				99	81
360
390
Metric rank (µm)	Dl7 /+ ; scaBP2 /+
	Pupae 1		Pupae 2		Pupae 3		Pupae 4		Pupae 5		Pupae 6		Pupae 7		Pupae 8
	G	D	G	D	G	D	G	D	G	D	G	D	G	D	G	D
-330
-300
-270
-240		69	45	51						96			48	18
-210		42	48	33				93		18			48	48	63
-180		36	54	24	33	39		87		48			18	36	111
-150		81	57	51	18	72		51		42		3	102	48	42	60
-120	93	36	72	12	72	45	78	63	45	21		33	33	15	45	105
-90	36	6	42	72	72	69	21	39	144	6		15	30	30	93	111
-60	63	69	93	36	66	36	75	96	48	30	114	21	6	51	39	18
-30	81	6	63	15	21	6	42	15	54	6	114	96	0	33	33	102
0	0	0	0	0	0	0	0	0	0	0	0	0	0	0	0	0
30	90	69	33	15	45	6	39	174	90	24	51	54	45	51	24	15
60	18	63	54	48	39	24	9	15	66		24	0	15	117	63	48
90	105	57	69	27	81	60	39	84	51		9	51	21	84	48	12
120	69	45		45		45	42	39	45		24	33	75		57
150	51	69		60		42	141		48		9	57	36		78
180	99						30				9	27	54		66
210	114										15		84
240	66										69
270	66										36
300	78										21
330
360
390
Genotype	Control		Dl7 /+ ; scaBP2 /+
Linear regression	Row 1		Row 1
	Anterior	Posterior	Anterior	Posterior
Best-fit values ± SE
Slope	-0,22 ± 0,046	0,284 ± 0,024	-0,01871 ± 0,01919	0,03806 ± 0,03443
1/slope	-4.5	3.521	-53.45	26.27
Speed (µm/min)	4.5	3.521	53.45	26.27
R square	0,82	0.9342	0.9508	0.1325
Equation	Y = -0,22*X + 37	Y = 0,284*X + 26,03	Y = -0,01871*X + 48,08	Y = 0,03806*X + 47,49

## Sheet: Fig3G-Source Data
	Genotype	Row	µ	r
	Control ScaBP2	1	0.505103	37.7074
	scaBP2/+	1	0.527315	37.9226
	Dl/+	1	0.480949	38.3411
	scaBP2/+; Dl / +	1	0.374435	37.3584
