# Supplementary material for: A neural progenitor mitotic wave is required for asynchronous axon outgrowth and morphology
Source: eLife journal article supplement (doi:10.7554/elife.75746), 2022-03-07
Supplement: supp [file elife-75746-supp-v1.zip]

Archive with 28 entries (28 files):
- elife_poa_e75746_Figure_1_figure_supplement_1.pdf
- elife_poa_e75746_Figure_1_figure_supplement_2.pdf
- elife_poa_e75746_Figure_1_figure_supplement_3.pdf
- elife_poa_e75746_Figure_2_figure_supplement_1.pdf
- elife_poa_e75746_Figure_2_figure_supplement_2.pdf
- elife_poa_e75746_Figure_3_figure_supplement_1.pdf
- elife_poa_e75746_Figure_3_figure_supplement_2.pdf
- elife_poa_e75746_Figure_3_figure_supplement_3.pdf
- elife_poa_e75746_Figure_4_figure_supplement_1.pdf
- elife_poa_e75746_Video_1.mov
- elife_poa_e75746_Video_2.avi
- elife_poa_e75746_Figure_2_video_1.mov
- elife_poa_e75746_Figure_2_video_2.mov
- elife_poa_e75746_Figure_2_video_3.avi
- elife_poa_e75746_Figure_5_video_1.avi
- elife_poa_e75746_Figure_1_source_data_1.xlsx
- elife_poa_e75746_Figure_1_figure_supplement_2_source_data_1.xlsx
- elife_poa_e75746_Figure_1_figure_supplement_3_source_data_1.xlsx
- elife_poa_e75746_Figure_2_source_data_1.xlsx
- elife_poa_e75746_Figure_2_source_data_2.xlsx
- elife_poa_e75746_Figure_3_source_data_1.xlsx
- elife_poa_e75746_Figure_3_figure_supplement_2_source_data_1.xlsx
- elife_poa_e75746_Figure_3_figure_supplement_3_source_data_1.xlsx
- elife_poa_e75746_Figure_4_source_data_1.xlsx
- elife_poa_e75746_Figure_5_source_data_1.xlsx
- elife_poa_e75746_Appendix_1_figure_2_source_code_1.py
- elife_poa_e75746_Appendix_1_figure_2_source_code_2.py
- elife_poa_e75746_Transparent_Reporting_File.docx
