# Supplementary material for: A neural progenitor mitotic wave is required for asynchronous axon outgrowth and morphology
Source: eLife journal article supplement (doi:10.7554/elife.75746), 2022-03-07
Supplement: supp [file elife-75746-supp-v1.zip › elife_poa_e75746_Appendix_1_figure_2_source_code_2.py]

import numpy as np 
import matplotlib.pyplot as plt


def geo(ks, l, theta, v):
    return (1-l) ** ks * (theta/v - theta/(v * l)) + theta/(v * l)


ks = np.arange(10)
theta = 1
v = 1

for i, l in enumerate([0.9, 0.7, 0.4, 0.2]):
    tk = geo(ks, l, theta, v)
    plt.subplot(2,2,i + 1)
    plt.plot(ks, tk - tk[0])
    plt.legend([f'{l}'], loc='lower right')
#plt.show()
plt.savefig('simple.pdf')
