# Supplementary material for: A neural progenitor mitotic wave is required for asynchronous axon outgrowth and morphology
Source: eLife journal article supplement (doi:10.7554/elife.75746), 2022-03-07
Supplement: supp [file elife-75746-supp-v1.zip › elife_poa_e75746_Figure_1_figure_supplement_2_source_data_1.xlsx]

## Sheet: Figure 1 - figure supplement 2
Figure S2
Metric rank (µm)	R1 Control	R2 Control	R3 Control		Metric rank (µm)	R1 ScaBP2	R2 ScaBP2	R3 ScaBP2
-420					-308	0	5.55556	0
-390					-286	0	11.1111	5.26316
-360					-264	0	11.1111	0
-330					-242	4.7619	5.55556	5.26316
-300	0	6.25	0		-220	9.52381	0	5.26316
-270	0	0	6.25		-198	9.52381	16.6667	10.5263
-240	0	6.25	12.5		-176	0	11.1111	10.5263
-210	6.25	37.5	31.25		-154	4.7619	16.6667	15.7895
-180	18.75	25	37.5		-132	33.3333	11.1111	21.0526
-150	31.25	12.5	0		-110	14.2857	5.55556	0
-120	6.25	6.25	6.25		-88	0	0	15.7895
-90	18.75	6.25	6.25		-66	9.52381	5.55556	5.26316
-60	12.5	0	0		-44	9.52381	0	0
-30	0	0	0		-22	0	0	0
0	6.25	0	0		0	0	0	5.26316
30	0	0	0		22	0	0	0
60	0	0	0		44	0	0	0
90	0	0	0		66	4.7619	0	0
