# Supplementary material for: A neural progenitor mitotic wave is required for asynchronous axon outgrowth and morphology
Source: eLife journal article supplement (doi:10.7554/elife.75746), 2022-03-07
Supplement: supp [file elife-75746-supp-v1.zip › elife_poa_e75746_Figure_1_figure_supplement_3_source_data_1.xlsx]

## Sheet: Figure 1 - figure supplement 3A
Metric rank (µm)	R1 Control (division time min)																							Fit
-390	Pupae 1		Pupae 2		Pupae 3		Pupae 4		Pupae 5		Pupae 6		Pupae 7		Pupae 8		Pupae 9		Pupae 10
-360	G	D	G	D	G	D	G	D	G	D	G	D	G	D	G	D	G	D	G	D
-330
-300
-270
-240
-210			72	132						129		114												104.208
-180			60	24	147	162	114	147	123	99		96	192	213			135			153				99.2986
-150	90	108	42	42	123	165	42	189	57	45	72	183	120	144	72	99	51	60		108				92.5852
-120	93	45	72	96	48	96	6	51	99	108	135	81	57	75	90	96	15	48	63	48				85.3707
-90	24	57	48	12	48	39	60	66	3	51	36	84	9	66	39	54	6	57	96	93				76.0521
-60	99	45	24	33	69	66	21	84	54	69	54	42	0	24	60	48	36	69	24	27				62.8257
-30	21	15	18	0	105	15	9	33	33	21	30	30	21	21	36	81	18	63	9	18				43.3868
0	0	0	0	0	0	0	0	0	0	0	0	0	0	0	0	0	0	0	0	0				0
30	15	9	18	54	54	42	45	15	15	57	120	66	3	33	99	9	12	51	18	51				46.6934
60	9	81	72	162	84	6	66	24	60	108	27	63	27	162	24	3	27	36	6	69				65.0301
90	48	48	189	45	66	144	33	177	81	108	96	165	48	63	57	48	30	81	144	66				77.8557
120	24	63		33	114	93	81	72	57	114	78	168	63	126	63	54	132	60	42	129				87.2745
150	135	48		72	126	150		57	129	123	66	123	189	75	87	69	60	75	3					94.5892
180		87		117		108		165	141		108				129	57	69	120	33					99.6994
210		96				162					159								123					135.872
Metric rank (µm)	R2 Control (division time min)
-180	Pupae 1		Pupae 2		Pupae 3		Pupae 4		Pupae 5		Pupae 6		Pupae 7		Pupae 8		Pupae 9		Pupae 10
-150	G	D	G	D	G	D	G	D	G	D	G	D	G	D	G	D	G	D	G	D
-120	45													111										85.1703
-90	27	21		81		93		57	108	81	48			75			15	75		123				76.2525
-60	6	42		54	45	3	117	102	51	54	126	81	42	21		36	12	30		54				63.6273
-30	24	45	6	66	36	21	36	111	87	153	63	36	84	24	21	3	15	12	45	51				42.3848
0	0	0	0	0	0	0	0	0	0	0	0	0	0	0	0	0	0	0	0	0				0
30	75	90	126	12	9	3	66	54	45	30	39	63	24	24	18	45	21	27	9	15				44.489
60	75	9	30	33	69	27	30	72	24	9	78	27	36	12	30	33	9	30	60	18				64.0281
90	75	84	30	36	54	78	54	99		75	87	30	15	57	9	63	45	81	21	36				78.0561
120	99	102	66	30	51	90	66	120		105		51	24		21	39	78	18	129	66				87.0741
150			39	96	99		117	141		261		93	36		21		81	66						94.0882
180			27									117			75									100.501
Metric rank (µm)	R3 Control (division time min)
-240	Pupae 1		Pupae 2		Pupae 3		Pupae 4		Pupae 5		Pupae 6		Pupae 7		Pupae 8		Pupae 9		Pupae 10		Pupae 11
-210	G	D	G	D	G	D	G	D	G	D	G	D	G	D	G	D	G	D	G	D	G	D
-180
-150
-120			72			81								132					48		150	105		85.9719
-90		57	69		57	75		108	108		75			96					18	69	129	105		77.0541
-60		12	30		24	51	123	45	30		45	33	18	54		90	33		63	42	15	27		63.0261
-30	90	51	48	30	45	81	81	102	153		27	87	27	66	165	12	30	30	48	60	3	36		42.5852
0	0	0	0	0	0	0	0	0	0	0	0	0	0	0	0	0	0	0	0	0	0	0		0
30	75	48	51	36	90	75	33	36	9	33	66	96	30	33	42	3	27	39	12	99	6	66		43.7876
60	66	60	48	33	0	51	195	27	60	6	78	33	30		66	18	42	42		69	42	75		65.0301
90	51	69	99	27	57	132	96	48	57	84	63	48	117		54	60	60	45				54		77.2545
120	57	120	96	60	69	156	228	99	105	36	72	48			66	66	66	57						85.2705
150	87		135	123			72	93		69		66			72			78						91.0822
180	156			87			177	114		105		93												98.1964
210				159				153		138														103.006
240
270
300
330

## Sheet: Figure 1 - figure supplement 3B
Metric rank (µm)	R1 rac1N17 (division time min)													Fit
	Pupae 1		Pupae 2		Pupae 3		Pupae 4		Pupae 5		Pupae 6
-240	G	D	G	D	G	D	G	D	G	D	G	D
-210
-180							63	15						57.014
-150		33		36			12	27			9	72		56.012
-120	66	42		57			9	18			36	66		54.6092
-90	33	9		24	72		18	3		96	75	39		52.1042
-60	12	21		42	51		51	3	48	51	18	21		47.3948
-30	15	9	99	6	81	33	9	51	33	21	18	24		36.8737
0	0	0	0	0	0	0	0	0	0	0	0	0		0
30	9	39	51	45	45	12	24	21	99	36	30	6		31.0621
60	81	33	21	45	12	6	54		51	48	93	15		44.5892
90	75	48	30	81	63	24	24		45	60	33	54		52.1042
120	87	45	12	12	75	3			6	117		60		53.7074
150	54	51	54		42	15			48	84		84		55.7114
180		21	60		60	39			99	111				54.8096
210			45			72			96	75				55.01
240			78			39								54.8096
Metric rank (µm)	R2 rac1N17 (division time min)													Fit
	Pupae 1		Pupae 2		Pupae 3		Pupae 4		Pupae 5		Pupae 6
-240	G	D	G	D	G	D	G	D	G	D	G	D
-210
-180		48												38.7776
-150		33												40.3808
-120		42												39.98
-90	33	18	33			63	78		45					40.2806
-60	24	27	33	18	18	81	63	15	54					35.6713
-30	6	63	102	0	18	57	33	0	51	42	9			29.3587
0	0	0	0	0	0	0	0	0	0	0	0			0
30	6	27	0	45	105	12	75	12	66	33	30			29.3587
60	42	57	12	51	6	54	69	18	57	3	48			38.2766
90			24	51		90				18	21			38.7776
120				51		42				3	48			40.3808
150										30				41.0822
180
210
Metric rank (µm)	R3 rac1N17 (division time min)													Fit
	Pupae 1		Pupae 2		Pupae 3		Pupae 4		Pupae 5		Pupae 6
-210	G	D	G	D	G	D	G	D	G	D	G	D
-180
-150
-120				27	12			42			111			64.7295
-90	30	30		63	12			63	6	75	60	45		58.3166
-60	12	12	138	75	27			24	54	33	36	30		50.7014
-30	0	42	39	54	75	87	48	24	33	3	6	27		34.9699
0	0	0	0	0	0	0	0	0	0	0	0	0		0
30	15	15	42	0	42	51	15	60	66	18	45	30		34.9699
60		18	42	57	36	18	24	21	12	15	87	24		50.4008
90		54	66		78	96	0		63	48		45		58.4168
120		99			57	51	27			54				63.9279
150						21*
180

## Sheet: Figure 1 - figure supplement 3C
Metric rank (µm)	R1 RNAiisca																			Fit
-330	Pupae 1		Pupae 2		Pupae 3		Pupae 4		Pupae 5		Pupae 6		Pupae 7		Pupae 8		Pupae 9
-300	G	D	G	D	G	D	G	D	G	D	G	D	G	D	G	D	G	D
-270
-240
-210
-180	18								45			42		78				114		51.4028
-150	75		66			66	39		42	33		144	60	138	78			72		51.002
-120	75	108	45			45	51		114	105	51	12	24	39	45		30	36		50.9018
-90	69	159	24			24	42	15	24	36	24	6	81	33	21		63	63		49.6994
-60	144	87	111	90	90	111	45	45	3	24	18	18	36	144	9	39	48	9		45.8918
-30	0	45	3	33	33	3	81	63	24	33	15	3	45	39	36	117	33	18		37.0741
0	0	0	0	0	0	0	0	0	0	0	0	0	0	0	0	0	0	0		0
30	6	30	6	60	60	6	12	15	30	33	6	105	57	24	42	96	9	24		33.2665
60	3	78	3	15	15	3	15	21	42	51	3	81	39	51	3	9	9	75		44.8898
90	3	36	63	6	6	63	87	27	39	105	36	108	81	42	57	84	18	15		48.8978
120	21	93	57	27	27	57	66	6	51	39	48	75	54	45	90	60	33	33		50
150	72	81	72	72	72	72	60	93	24	36	96	102	84	120	54	36	54	36		49.1984
180	93	60	0	27	27			30		93	75	120	81	63		78		63		50
210				39	39			54								6				48.2966
240				78	78			51								33				47.8958
270				48	48											24				49.3988
300
330
360
390
Metric rank (µm)	R2 RNAiisca																			Fit
-240	Pupae 1		Pupae 2		Pupae 3		Pupae 4		Pupae 5		Pupae 6		Pupae 7		Pupae 8		Pupae 9
-210	G	D	G	D	G	D	G	D	G	D	G	D	G	D	G	D	G	D
-180
-150
-120			39	15	39	15				21			24					36		79.3587
-90			12	18	12	18	51	102		72	78	45	36	33			72	9		71.2425
-60			39	3	39	3	24	54	33	27	30	27	96	69	66		48	75		59.8196
-30	141	36	33	9	33	9	21	30	36	45	42	0	69	48	78	15	117	12		41.8838
0	0	0	0	0	0	0	0	0	0	0	0	0	0	0	0	0	0	0		0
30	30	15	48	9	48	9	24	72	12	42	60	33	18	24	51	6	48	21		39.8798
60	120	60	141	0	141		18	33	51	30	27	60	24	27	63	18	117	9		58.6172
90	57	60	15		15		24	66	39	60	60	60	48	111	72	21	54	6		70.8417
120	78	105	126		126		57	75	105	126	66		63	57	45	36	117	18		78.8577
150	126	51	75		75		72	117	156				90	81	84		90	66		86.3727
180	132	24	45		45			123							48		75	75		92.1844
210
240
270
Metric rank (µm)	R3 RNAiisca																			Fit
-210	Pupae 1		Pupae 2		Pupae 3		Pupae 4		Pupae 5		Pupae 6		Pupae 7		Pupae 8		Pupae 9
-180	G	D	G	D	G	D	G	D	G	D	G	D	G	D	G	D	G	D
-150
-120									93						12					62.4248
-90		96		24		24	3	51	21	54	51			21	21					56.7134
-60	54	150	33	24	33	24	21	42	84	48	21	24	36	24	12	60				49.1984
-30	150	21	12	9	12	9	18	27	42	12	144	18	12	0	9	24	36	102		34.3687
0	0	0	0	0	0	0	0	0	0	0	0	0	0	18	0	0	0	0		0
30	24	45	39	27	39	27	45	9	63	87	72	0	0	54	54	24	3	27		34.7695
60	93	99	42	66	42	66		30	51	18	30	9	30	42		51	0	15		51.1022
90	60	48	105	54	105	54		12	48	114	120	18	12	72		78	18	90		57.8156
120			42		42			51		75	48	96	42	87			72	15		64.3287
150			45		45			108		96	87	3	15	99			0	36		66.7335
180			87		87			51		141	0	78	75	0				93		67.5351
210								84		87	0	114	87	0				87		67.5351
240												123	51							67.6353
270
300
330

## Sheet: Figure 1 - figure supplement 3D
Metric rank (µm)	R1 Control (division time min)																																Fit
-300	Pupae 1		Pupae 2		Pupae 3		Pupae 4		Pupae 5		Pupae 6		Pupae 7		Pupae 8		Pupae 9		Pupae 10		Pupae 11		Pupae 12		Pupae 13		Pupae 14		Pupae 15		Pupae 16
-270	G	D	G	D	G	D	G	D	G	D	G	D	G	D	G	D	G	D	G	D	G	D	G	D	G	D	G	D	G	D	G	D
-240
-210								63		72							117											171			60	84	89.98
-180								78	60	63			24				33				90	123					63	33			60	165	85.9719
-150								60	3	144			24	90	48	24	54				42	95					43	66			51	109	81.1623
-120							141	72	9	3	114		0	27	48	33	99				30	33	81				51	123			36	144	75.1503
-90			246	51			36	33	84	60	33		42	12	21	24	6		60	33	6	99	69	78			9	51		153	36	18	67.2345
-60	57	36	90	36	156	132	36	45	21	6	24		36	102	42	102	84	24	36	24	60	36	63	39		21	63	33	66	75	51	66	56.012
-30	33	51	15	24	72	57	3	27	84	12	147	24	87	36	72	15	42	27	9	9	84	84	60	60	78	24	3	6	12	159	24	12	37.1743
0	0	0	0	0	0	0	0		0	0	0	0	0	0	0	0	0	0	0	0	0	0	0	0	0	0	0	0	0	0	0	0	0
30	9	15	75	87	30	45	138	54	15	33	0	33	18	150	24	9	123	24	66	48	51	15	102	39	30	30	6	0	33	63	72	12	39.1784
60	33	30	30	12	3	75	12	87	87	27	15	24	60	12	177	24	60	15	18	30	24	42	45	24	66	21	21	39	9	54	30	21	55.1102
90	27	6	24	9	57	6	42	120	42	48	48	24	105	21	9	15	39	84	60	24	15	84	72	33	93	132	12	33	93	129	30	99	66.5331
120	36	27	78	108	39	18	66	162	72	69	33	36	51	159	90	120	36	27	21	36	198	72	93	159	15	54	42	84	9	39	105	21	74.3487
150	54	30	36	3	66	63	51	231	96	12	78	75	129	69	24	48	42	12	51	117	57	30	69	24	126	18	90	72	36	57	54	27	80.2605
180	0	90	102	15	42	99	108			186	81	69	18	63	39	45	147	45	90	36	60	120	129	69	63	27	48	132	33	21	60	45	84.7695
210	66	57	87	81	57	84	75				75	51	84	75	87	117	72	15	96	129	135	99	102	42	117	90	123	114	21	81	87	48	89.0782
240	63	60	69	96	105	99	138					171		132	132	84	75	75	90	63	60		93	78	75	123	135		99	144			92.5852
270	96	90	219	48	78	102						63			57	144		180	147	114	111			84	102	72			75	72			95.7916
300	90		96	45	51	159						120			138			63	147						156	48			42	147			98.0962
330			201	78	105	204						132						48							105				99	81			100.401
Metric rank (µm)	R2 Control (division time min)																																Fit
-360	Pupae 1		Pupae 2		Pupae 3		Pupae 4		Pupae 5		Pupae 6		Pupae 7		Pupae 8		Pupae 9		Pupae 10		Pupae 11		Pupae 12		Pupae 13		Pupae 14		Pupae 15		Pupae 16
-330	G	D	G	D	G	D	G	D	G	D	G	D	G	D	G	D	G	D	G	D	G	D	G	D	G	D	G	D	G	D	G	D
-300
-270
-240
-210
-180
-150
-120		24			18							87			48											126							75.7515
-90	51	27			96			72		51		12	90		24	60	42			21	30					15		3	33	42			66.8337
-60	18	21	90		18			117	51	45	6	12	33	78	18	30	18		39	24	21	9	12	20		81	48	18	27	48			55.9118
-30	12	9	66	15	21	24	15	45	18	21	3	81	66	48	24	3	15		27	9	9	3	39	12	75	9	39	9	6	6			37.8758
0	0	0	0	0	0	0	0	0	0	0	0	0	0	0	0	0	0	0	0	0	0	0	0	0	0	0	0	0	0	0			0
30	57	57	48	63	42	48	84	24	129	3	9	21	18	18	51	18	33	9	27	21	24	42	9	27	39	21	36	3	42	69			38.8778
60	30	84	57	30	63	12	33	75	51	6	36	93	36	24	36	48	21	33	60	21	48	3	36	33	54	39	153	9	30	45			57.4148
90	42	33	57	33	75	93	45	45	36	51	27	42	60	81	75	42	24	36	66	42	30	6	36	42	54	72	39	90	45	51			67.6353
120	9	42	78	69	66	12	48	84	48	18	36		45	72	93	69	15	87	48	39	60	39	69	93	63	63	87	78	57	63			75.3507
150	6	78	60	75	135	87	63	42	81	126	102		66	27	132	33	24	93	21	36	21	33	33	69	72	99	54	30	60	60			81.1623
180	57	102	60	39		39	78	90	120	42			66	57	123		9	75	120	63	69	66	45	54	69	117	99	51	96	90			86.2725
210	72	102	90	81		75	90	174	144	72			126	63			54	84	42	45	60	33	93	75	99	120	105	87	123	108			91.2826
240	72	102	99	138		84	120		144	159			75	105			99	78	141	54	93	42	69	123			105	72					94.99
270						96	165		204	69				105			30	102	87	216	195	96						90					98.2966
300						120											123	102	123														101.202
330
360
Metric rank (µm)	R3 Control (division time min)																																Fit
-390	Pupae 1		Pupae 2		Pupae 3		Pupae 4		Pupae 5		Pupae 6		Pupae 7		Pupae 8		Pupae 9		Pupae 10		Pupae 11		Pupae 12		Pupae 13		Pupae 14		Pupae 15		Pupae 16
-360	G	D	G	D	G	D	G	D	G	D	G	D	G	D	G	D	G	D	G	D	G	D	G	D	G	D	G	D	G	D	G	D
-330
-300
-270
-240
-210
-180
-150																		42								45							91.3828
-120				132	81			96										21								36	75						83.8677
-90	99			141	33			87									15	6	30	48	39			42		144	33						74.4489
-60	60		3	42	15	21	6	9	84			51	162				174	15	0	45	102			3	84	27	30	54	57				62.024
-30	51	36	6	3	6	18	3	48	90			6	120	9	18		24	24	3	21	33	81		21	39	90	9	30	51				44.1884
0	0	0	0	0	0	0	0	0	0	0	0	0	0	0	0	0	0	0	0	0	0	0	0	0	0	0	0	0	0	0			0
30	27	15	33	9	117	75	15	21	42	36	6	33	48	54	6	36	45	15	21	6	33	54	27		18	60	54	33	12	57			41.8838
60	12	42	132	6	57	87	39	39	42	39	39	24	21	33	3	33	33	27	54	12	57	24	51		24	78	81	57	9	39			62.7255
90	48	54	81	24	54	90	48	114	39	51	24	60	57	27	27	30	60	30	84	30	30	42	36		69	87	96	69	3	30			75.7515
120	42	66	66	51	84	105	102	30	54	57	48	48	51	21	60	63	66	63	45	54	66	30	66		84	102	78	165	54	72			85.0701
150	54	87	78	72	96	129	75	78	99	66	51	54	120	45	102	54	51	60	87	63	45	81	81		165	126	135	93	69	72			91.984
180	87	105	105	57	84	123	48	141	99	144	48	57	87	57	87	72	63	66	36	66	117	87	87		72	108	150	264	39	159			98.7976
210	150	99	81	75	171	189	90	114	108	93	66	63	78	240	81	123	75	99	174	63	102	135	102		87	108		93	78	126			104.409
240	78	144	84	66	123		75	102	105	117	111	72	102	78	135	90	96	75		126	75	75	108			180		114	54	96			108.918
270	99		87	120			252	177	144	105	180	114	69	168	99	153	150	78		75	132	120	117					168	96	93			112.725
300	105		135	159				183		174	99	69	99	120	150	123	153	60		162	135	132	102						51				116.132
330								168			117	111		123	165	189	168			87	123	132							159				119.238
360
390

## Sheet: Figure 1 - figure supplement 3E
Metric rank (µm)	R1 scaBP2 (division time min)																			Fit
	Pupae 1		Pupae 2		Pupae 3		Pupae 4		Pupae 5		Pupae 6		Pupae 7		Pupae 8		Pupae 9
-286	G	D	G	D	G	D	G	D	G	D	G	D	G	D	G	D	G	D
-264
-242
-220			83				27				15									48.3968
-198	63		84				60				54	42								49.6994
-176	81		93	63	60		42				33	30						69		48.8978
-154	51		93	96	67		18	60		114	12	18	42	24	18			63		48.2966
-132	66	69	129	72	76		6	30		120	24	15	42	36	9			45		48.8978
-110	57	69	84	93	61		6	72		96	33	33	30	0	30			30		49.2986
-88	21	117	78	90	72		3	54		93	18	3	30	48	24			48		50.4008
-66	48	24	126	51	54	77	27	93	111	39	24	9	9	39	15		111	33		49.0982
-44	18	48	33	57	18	87	81	27	54	90	33	27	6	39	12	27	126	21		44.2886
-22	0	63	45	54	54	78	3	9	90	78	21	18	12	18	39	18	54	45		33.6673
0	0	0	0	0	0	0	0	0	0	0	0	0	0	0	0	0	0	0		0
22	33	12	75	33	31	0	9	3	84	75	24	18	12	33	24	36	72	45		30.1603
44	45	15	60	21	46	99	24	18	75	48	45	27	6	27	24	93	18	27		44.2886
66	96	9	93	48	30	78	21	60	57	66	39	15	9	12	6	51	84	30		49.1984
88	18	21	102	60	51	68	33	15	57	84	30	3	39	42	3	45	45	30		50.3006
110	39	9	63	60	40	68	18	135	30	9	27	48	18	60	48	15	57	30		50.9018
132	30	27	48	57	0	72	51	45	24	45		39	12	63	36	54	57	30		49.1984
154	42	33	75	51	55	57	120	69	9	60		57	24	63	39	42	24	18		48.7976
176	63	75			66	54	96	54	81	75		30			18	3	60	60		48.0962
198	21	51			97	54		75	51	3		45			54	9	30	51		48.6974
220	63	30			72	59		90	36	51		48				30	30	18		51.503
242	63	36			72	68		78	18	54		42				6	81	30		49.3988
264		36				62			24	27						42	48	51		48.3968
286						89			39							24	51	60		49.5992
308						80			90							63	54	39		49.499
330									54								39			49.0982
									87								54
Metric rank (µm)	R2 scaBP2 (division time min)																			Fit
-286	Pupae 1		Pupae 2		Pupae 3		Pupae 4		Pupae 5		Pupae 6		Pupae 7		Pupae 8		Pupae 9
-264	G	D	G	D	G	D	G	D	G	D	G	D	G	D	G	D	G	D
-242
-220
-198
-176
-154
-132				90					30		30									59.519
-110	123	69		108			78	102	21		33		21							58.517
-88	66	69	69	102			63	48	36	75	21		15			39				57.1142
-66	21	15	27	96			45	51	24	51	18		9	39		57				52.8056
-44	72		51	60			60	42	21	36	6		27	42		24				46.6934
-22	48	21	45	99		18	21	102	39	15	9	33	18	36	15	48				35.8717
0	0	0	0	0	0	0	0	0	0	0	0	0	0	0	0	0				0
22	57	48	24	111	15	15	15	33	24	33	42	9	27	33	3	36				33.3667
44	39	66	12	90	27	6	24	51	33	27	57	3		12	3	39				48.998
66	51	51	63	138	15	33	42	60	42	45	54	6		18	3	36				55.4108
88	96	141	39	111	15	24	30	48	36	51	54	3		42	27	45				59.7194
110	66	66	51	129	45	42	48	39		36	39	9		33	27	75				61.1222
132	66	54	48	93	30	69	84	87		51	42	36			33	84				61.2224
154	93	69	45		42	72	60	78		54	57	54			45	87				61.4228
176	105	117	63		24	39		81		57		45			45	51				61.6232
198	114	90			48	54				39		39				57				60.2204
220	132	69			30	60						39				51				60.7214
242					57	99										75				62.3246
264																48				61.6232
286
308
330
Metric rank (µm)	R3 scaBP2 (division time min)																			Fit
-286	Pupae 1		Pupae 2		Pupae 3		Pupae 4		Pupae 5		Pupae 6		Pupae 7		Pupae 8		Pupae 9
-264	G	D	G	D	G	D	G	D	G	D	G	D	G	D	G	D	G	D
-242
-220
-198
-176
-154
-132					70.5	54	111		60		81									67.6353
-110			51	54	84	34.5	18		66	111	69					42				66.1323
-88	174		9	54	69	48	36	36	51	99	45				18	51				62.2244
-66	183	87	63	90	76.5	52.5	24	57	21	66	18		15		39	54	42			57.1142
-44	105	96	57	3	87	72	105	39	63	45	6	42	27		45	6	33			49.0982
-22	21	36	75	63	48	69	45	9	69	12	15	42	18	24	21	15	36			33.3667
0	0	0	0	0	0	0	0	0	0	0	0	0	0	0	0	0	0	0		0
22	63	21	48	90	61.5	99	66	60	54	9	9	15	39	6	57	42	63	63		31.3627
44	66	18	48	36	72		81	12	66	21	33	45	30	12	33	0	39	6		48.2966
66	45	3	66	63	51		81	54	66	39	51	30	21	15	57	33	39	15		56.3126
88	33	51	39	63	61.5		108	84	87	6	15	27	36	18	78	66	33	57		62.2244
110	105	51	36	99	67.5		96	84	87	60	33	6	33	15	78	39	45	51		65.1303
132	60	42	105	36	90		105	84	87	42	30	21	51	12	66	54	105	75		66.5331
154	93	60	84				99	87	105	39		18	57	27	66	48	81	39		67.6353
176	78	54	99					90	105			45	51	57	66		54	54		68.0361
198	108	111										45	45	24			84	66		67.1343
220	120	78										45					51	75		66.8337
242	99																87	45		66.8337
264	126																48	63		67.7355
286	105																	54		73.9479
308
330

## Sheet: Figure 1 - figure supplement 3F
	Genotype	Row	µ	r
	Control ScaBP2	1	0.505103	37.7074
		2	0.5137	36.1178
		3	0.5418	38.136
	ScaBP2	1	0.31375	41.087
		2	0.413846	36.5621
		3	0.334096	39.6177
	Control rac1N17	1	0.521799	40.3836
		2	0.52572	40.0289
		3	0.514461	40.8025
	Rac1N17	1	0.360454	39.1234
		2	0.251063	39.0474
		3	0.470429	33.7804
	Control scaRNAi	1	0.521799	40.3836
		2	0.52572	40.0289
		3	0.514461	40.8025
	ScaRNAi	1	0.303407	42.4818
		2	0.519704	37.1522
		3	0.439592	36.8906
