# Supplementary material for: A neural progenitor mitotic wave is required for asynchronous axon outgrowth and morphology
Source: eLife journal article supplement (doi:10.7554/elife.75746), 2022-03-07
Supplement: supp [file elife-75746-supp-v1.zip › elife_poa_e75746_Figure_1_source_data_1.xlsx]

## Sheet: Fig1C-source data 
Figure 1C
Metric rank (µm)	R1 Control (division time min)																																	Metric rank (µm)		R2 Control (division time min)
	Pupae 1		Pupae 2		Pupae 3		Pupae 4		Pupae 5		Pupae 6		Pupae 7		Pupae 8		Pupae 9		Pupae 10		Pupae 11		Pupae 12		Pupae 13		Pupae 14		Pupae 15		Pupae 16				Pupae 1		Pupae 2		Pupae 3		Pupae 4		Pupae 5		Pupae 6		Pupae 7		Pupae 8
	G	D	G	D	G	D	G	D	G	D	G	D	G	D	G	D	G	D	G	D	G	D	G	D	G	D	G	D	G	D	G	D			G	D	G	D	G	D	G	D	G	D	G	D	G	D	G
-330																																		-330
-300																																		-300
-270																																		-270
-240																																		-240
-210								63		72							117											171			60	84		-210
-180								78	60	63			24				33				90	123					63	33			60	165		-180
-150								60	3	144			24	90	48	24	54				42	95					43	66			51	109		-150
-120							141	72	9	3	114		0	27	48	33	99				30	33	81				51	123			36	144		-120		24			18							87			48
-90			246	51			36	33	84	60	33		42	12	21	24	6		60	33	6	99	69	78			9	51		153	36	18		-90	51	27			96			72		51		12	90		24
-60	57	36	90	36	156	132	36	45	21	6	24		36	102	42	102	84	24	36	24	60	36	63	39		21	63	33	66	75	51	66		-60	18	21	90		18			117	51	45	6	12	33	78	18
-30	33	51	15	24	72	57	3	27	84	12	147	24	87	36	72	15	42	27	9	9	84	84	60	60	78	24	3	6	12	159	24	12		-30	12	9	66	15	21	24	15	45	18	21	3	81	66	48	24
0	0	0	0	0	0	0	0	0	0	0	0	0	0	0	0	0	0	0	0	0	0	0	0	0	0	0	0	0	0	0	0	0		0
30	9	15	75	87	30	45	138	54	15	33	0	33	18	150	24	9	123	24	66	48	51	15	102	39	30	30	6	0	33	63	72	12		30	57	57	48	63	42	48	84	24	129	3	9	21	18	18	51
60	33	30	30	12	3	75	12	87	87	27	15	24	60	12	177	24	60	15	18	30	24	42	45	24	66	21	21	39	9	54	30	21		60	30	84	57	30	63	12	33	75	51	6	36	93	36	24	36
90	27	6	24	9	57	6	42	120	42	48	48	24	105	21	9	15	39	84	60	24	15	84	72	33	93	132	12	33	93	129	30	99		90	42	33	57	33	75	93	45	45	36	51	27	42	60	81	75
120	36	27	78	108	39	18	66	162	72	69	33	36	51	159	90	120	36	27	21	36	198	72	93	159	15	54	42	84	9	39	105	21		120	9	42	78	69	66	12	48	84	48	18	36		45	72	93
150	54	30	36	3	66	63	51	231	96	12	78	75	129	69	24	48	42	12	51	117	57	30	69	24	126	18	90	72	36	57	54	27		150	6	78	60	75	135	87	63	42	81	126	102		66	27	132
180	0	90	102	15	42	99	108			186	81	69	18	63	39	45	147	45	90	36	60	120	129	69	63	27	48	132	33	21	60	45		180	57	102	60	39		39	78	90	120	42			66	57	123
210	66	57	87	81	57	84	75				75	51	84	75	87	117	72	15	96	129	135	99	102	42	117	90	123	114	21	81	87	48		210	72	102	90	81		75	90	174	144	72			126	63
240	63	60	69	96	105	99	138					171		132	132	84	75	75	90	63	60		93	78	75	123	135		99	144				240	72	102	99	138		84	120		144	159			75	105
270	96	90	219	48	78	102						63			57	144		180	147	114	111			84	102	72			75	72				270						96	165		204	69				105
300	90		96	45	51	159						120			138			63	147						156	48			42	147				300						120
330			201	78	105	204						132						48							105				99	81				330
360																																		360
390																																		390
Genotype	Control
Linear regression	Row 1		Row 2		Row 3		Rows 1-3 (pooled)
	Anterior	Posterior	Anterior	Posterior	Anterior	Posterior	Anterior	Posterior	Pool (ant+post)
Best-fit values ± SE
Slope	-0,22 ± 0,046	0,284 ± 0,024	-0,37 ± 0,06	0,3283 ± 0,0225	-0,34 ± 0,15	0,3805 ± 0,0229	-0,2631 ± 0,04339	0,3221 ± 0,01241	0,3183 ± 0,01341
1/slope	-4.5	3.521	-2.7	3.046	-3	2.628	-3.801	3.105	3.142
Speed (µm/min)	4.5	3.521	2.7	3.046	3	2.628	3.801	3.105	3.142
R square	0,82	0.9342	0.95	0.9636	0.54	0.9649	0.8803	0.9854	0.9707
Equation	Y = -0,22*X + 37	Y = 0,284*X + 26,03	Y = -0,37*X + 13	Y = 0,3283*X + 20,51	Y = -0,34*X + 26	Y = 0,3805*X + 20,68	Y = -0,2631*X + 27,8	Y = 0,3221*X + 23,17	Y = 0,3183*X + 22,9
[truncated: 45 more columns]

## Sheet: Fig1D-source data 
Figure 1D
Metric rank (µm)	R1-3 Control (division time min)
-330
-300
-270
-240
-210								63		72							117					57						171			60	84
-180								78	60	63			24				33				90	123					63	33			60	165
-150								60	3	144			24	90	48	24	54				42	95					43	66			51	109		39										39			18
-120							141	72	9	3	114		0	27	48	33	99				30	33	81				51	123			36	144		24			18							87			48
-90			246	51			36	33	84	60	33		42	12	21	24	6		60	33	6	99	69	78			9	51		153	36	18	51	27			96			72		51		12	90		24	60	42
-60	57	36	90	36	156	132	36	45	21	6	24		36	102	42	102	84	24	36	24	60	36	63	39		21	63	33	66	75	51	66	18	21	90		18			117	51	45	6	12	33	78	18	30	18
-30	33	51	15	24	72	57	3	27	84	12	147	24	87	36	72	15	42	27	9	9	84	84	60	60	78	24	3	6	12	159	24	12	12	9	66	15	21	24	15	45	18	21	3	81	66	48	24	3	15
0	0	0	0	0	0	0	0	0	0	0	0	0	0	0	0	0	0	0	0	0	0	0	0	0	0	0	0	0	0	0	0	0	0	0	0	0	0	0	0	0	0	0	0	0	0	0	0	0	0
30	9	15	75	87	30	45	138	54	15	33	0	33	18	150	24	9	123	24	66	48	51	15	102	39	30	30	6	0	33	63	72	12	57	57	48	63	42	48	84	24	129	3	9	21	18	18	51	18	33
60	33	30	30	12	3	75	12	87	87	27	15	24	60	12	177	24	60	15	18	30	24	42	45	24	66	21	21	39	9	54	30	21	30	84	57	30	63	12	33	75	51	6	36	93	36	24	36	48	21
90	27	6	24	9	57	6	42	120	42	48	48	24	105	21	9	15	39	84	60	24	15	84	72	33	93	132	12	33	93	129	30	99	42	33	57	33	75	93	45	45	36	51	27	42	60	81	75	42	24
120	36	27	78	108	39	18	66	162	72	69	33	36	51	159	90	120	36	27	21	36	198	72	93	159	15	54	42	84	9	39	105	21	9	42	78	69	66	12	48	84	48	18	36		45	72	93	69	15
150	54	30	36	3	66	63	51	231	96	12	78	75	129	69	24	48	42	12	51	117	57	30	69	24	126	18	90	72	36	57	54	27	6	78	60	75	135	87	63	42	81	126	102		66	27	132	33	24
180	0	90	102	15	42	99	108			186	81	69	18	63	39	45	147	45	90	36	60	120	129	69	63	27	48	132	33	21	60	45	57	102	60	39		39	78	90	120	42			66	57	123		9
210	66	57	87	81	57	84	75				75	51	84	75	87	117	72	15	96	129	135	99	102	42	117	90	123	114	21	81	87	48	72	102	90	81		75	90	174	144	72			126	63			54
240	63	60	69	96	105	99	138					171		132	132	84	75	75	90	63	60		93	78	75	123	135		99	144			72	102	99	138		84	120		144	159			75	105			99
270	96	90	219	48	78	102						63			57	144		180	147	114	111			84	102	72			75	72								96	165		204	69				105			30
300	90		96	45	51	159						120			138			63	147						156	48			42	147								120											123
330			201	78	105	204						132						48							105				99	81								126
360				66																									144									111
390
[truncated: 44 more columns]
