# Supplementary material for: A neural progenitor mitotic wave is required for asynchronous axon outgrowth and morphology
Source: eLife journal article supplement (doi:10.7554/elife.75746), 2022-03-07
Supplement: supp [file elife-75746-supp-v1.zip › elife_poa_e75746_Figure_2_source_data_2.xlsx]

## Sheet: Figure 3 - figure supplement 1A
Figure 3B
Metric rank (µm)	R1 Control (division time min)																																	Metric rank (µm)		R2 Control (division time min)
-390	Pupae 1		Pupae 2		Pupae 3		Pupae 4		Pupae 5		Pupae 6		Pupae 7		Pupae 8		Pupae 9		Pupae 10		Pupae 11		Pupae 12		Pupae 13		Pupae 14		Pupae 15		Pupae 16			-390	Pupae 1		Pupae 2		Pupae 3		Pupae 4		Pupae 5		Pupae 6		Pupae 7		Pupae 8
-360	G	D	G	D	G	D	G	D	G	D	G	D	G	D	G	D	G	D	G	D	G	D	G	D	G	D	G	D	G	D	G	D		-360	G	D	G	D	G	D	G	D	G	D	G	D	G	D	G
-330																																		-330
-300																																		-300
-270																																		-270
-240																																		-240
-210								63		72							117											171			60	84		-210
-180								78	60	63			24				33				90	123					63	33			60	165		-180
-150								60	3	144			24	90	48	24	54				42	95					43	66			51	109		-150
-120							141	72	9	3	114		0	27	48	33	99				30	33	81				51	123			36	144		-120		24			18							87			48
-90			246	51			36	33	84	60	33		42	12	21	24	6		60	33	6	99	69	78			9	51		153	36	18		-90	51	27			96			72		51		12	90		24
-60	57	36	90	36	156	132	36	45	21	6	24		36	102	42	102	84	24	36	24	60	36	63	39		21	63	33	66	75	51	66		-60	18	21	90		18			117	51	45	6	12	33	78	18
-30	33	51	15	24	72	57	3	27	84	12	147	24	87	36	72	15	42	27	9	9	84	84	60	60	78	24	3	6	12	159	24	12		-30	12	9	66	15	21	24	15	45	18	21	3	81	66	48	24
0	0	0	0	0	0	0	0	0	0	0	0	0	0	0	0	0	0	0	0	0	0	0	0	0	0	0	0	0	0	0	0	0		0
30	9	15	75	87	30	45	138	54	15	33	0	33	18	150	24	9	123	24	66	48	51	15	102	39	30	30	6	0	33	63	72	12		30	57	57	48	63	42	48	84	24	129	3	9	21	18	18	51
60	33	30	30	12	3	75	12	87	87	27	15	24	60	12	177	24	60	15	18	30	24	42	45	24	66	21	21	39	9	54	30	21		60	30	84	57	30	63	12	33	75	51	6	36	93	36	24	36
90	27	6	24	9	57	6	42	120	42	48	48	24	105	21	9	15	39	84	60	24	15	84	72	33	93	132	12	33	93	129	30	99		90	42	33	57	33	75	93	45	45	36	51	27	42	60	81	75
120	36	27	78	108	39	18	66	162	72	69	33	36	51	159	90	120	36	27	21	36	198	72	93	159	15	54	42	84	9	39	105	21		120	9	42	78	69	66	12	48	84	48	18	36		45	72	93
150	54	30	36	3	66	63	51	231	96	12	78	75	129	69	24	48	42	12	51	117	57	30	69	24	126	18	90	72	36	57	54	27		150	6	78	60	75	135	87	63	42	81	126	102		66	27	132
180	0	90	102	15	42	99	108			186	81	69	18	63	39	45	147	45	90	36	60	120	129	69	63	27	48	132	33	21	60	45		180	57	102	60	39		39	78	90	120	42			66	57	123
210	66	57	87	81	57	84	75				75	51	84	75	87	117	72	15	96	129	135	99	102	42	117	90	123	114	21	81	87	48		210	72	102	90	81		75	90	174	144	72			126	63
240	63	60	69	96	105	99	138					171		132	132	84	75	75	90	63	60		93	78	75	123	135		99	144				240	72	102	99	138		84	120		144	159			75	105
270	96	90	219	48	78	102						63			57	144		180	147	114	111			84	102	72			75	72				270						96	165		204	69				105
300	90		96	45	51	159						120			138			63	147						156	48			42	147				300						120
330			201	78	105	204						132						48							105				99	81				330
360																																		360
390																																		390
Metric rank (µm)	R1 scaBP2 (division time min)																			Metric rank (µm)	R2 scaBP2 (division time min)																	Metric rank (µm)	R3 scaBP2 (division time min)
	Pupae 1		Pupae 2		Pupae 3		Pupae 4		Pupae 5		Pupae 6		Pupae 7		Pupae 8		Pupae 9				Pupae 1		Pupae 2		Pupae 3		Pupae 4		Pupae 5		Pupae 6		Pupae 7		Pupae 8				Pupae 1		Pupae 2		Pupae 3		Pupae 4		Pupae 5		Pupae 6
-286	G	D	G	D	G	D	G	D	G	D	G	D	G	D	G	D	G	D		-286	G	D	G	D	G	D	G	D	G	D	G	D	G	D	G	D			G	D	G	D	G	D	G	D	G	D	G
-264																				-264
-242																				-242																		-242
-220			83				27				15									-220																		-220
-198	63		84				60				54	42								-198																		-198
-176	81		93	63	60		42				33	30						69		-176																		-176
-154	51		93	96	67		18	60		114	12	18	42	24	18			63		-154																		-154
-132	66	69	129	72	76		6	30		120	24	15	42	36	9			45		-132				90					30		30							-132					70.5	54	111		60		81
-110	57	69	84	93	61		6	72		96	33	33	30	0	30			30		-110	123	69		108			78	102	21		33		21					-110			51	54	84	34.5	18		66	111	69
-88	21	117	78	90	72		3	54		93	18	3	30	48	24			48		-88	66	69	69	102			63	48	36	75	21		15			39		-88	174		9	54	69	48	36	36	51	99	45
-66	48	24	126	51	54	77	27	93	111	39	24	9	9	39	15		111	33		-66	21	15	27	96			45	51	24	51	18		9	39		57		-66	183	87	63	90	76.5	52.5	24	57	21	66	18
-44	18	48	33	57	18	87	81	27	54	90	33	27	6	39	12	27	126	21		-44	72		51	60			60	42	21	36	6		27	42		24		-44	105	96	57	3	87	72	105	39	63	45	6
-22	0	63	45	54	54	78	3	9	90	78	21	18	12	18	39	18	54	45		-22	48	21	45	99		18	21	102	39	15	9	33	18	36	15	48		-22	21	36	75	63	48	69	45	9	69	12	15
0	0	0	0	0	0	0	0	0	0	0	0	0	0	0	0	0	0	0		0	0	0	0	0	0	0	0	0	0	0	0	0	0	0	0	0		0	0	0	0	0	0	0	0	0	0	0	0
22	33	12	75	33	31	0	9	3	84	75	24	18	12	33	24	36	72	45		22	57	48	24	111	15	15	15	33	24	33	42	9	27	33	3	36		22	63	21	48	90	61.5	99	66	60	54	9	9
44	45	15	60	21	46	99	24	18	75	48	45	27	6	27	24	93	18	27		44	39	66	12	90	27	6	24	51	33	27	57	3		12	3	39		44	66	18	48	36	72		81	12	66	21	33
66	96	9	93	48	30	78	21	60	57	66	39	15	9	12	6	51	84	30		66	51	51	63	138	15	33	42	60	42	45	54	6		18	3	36		66	45	3	66	63	51		81	54	66	39	51
88	18	21	102	60	51	68	33	15	57	84	30	3	39	42	3	45	45	30		88	96	141	39	111	15	24	30	48	36	51	54	3		42	27	45		88	33	51	39	63	61.5		108	84	87	6	15
110	39	9	63	60	40	68	18	135	30	9	27	48	18	60	48	15	57	30		110	66	66	51	129	45	42	48	39		36	39	9		33	27	75		110	105	51	36	99	67.5		96	84	87	60	33
132	30	27	48	57	0	72	51	45	24	45		39	12	63	36	54	57	30		132	66	54	48	93	30	69	84	87		51	42	36			33	84		132	60	42	105	36	90		105	84	87	42	30
154	42	33	75	51	55	57	120	69	9	60		57	24	63	39	42	24	18		154	93	69	45		42	72	60	78		54	57	54			45	87		154	93	60	84				99	87	105	39
176	63	75			66	54	96	54	81	75		30			18	3	60	60		176	105	117	63		24	39		81		57		45			45	51		176	78	54	99					90	105
198	21	51			97	54		75	51	3		45			54	9	30	51		198	114	90			48	54				39		39				57		198	108	111
220	63	30			72	59		90	36	51		48				30	30	18		220	132	69			30	60						39				51		220	120	78
242	63	36			72	68		78	18	54		42				6	81	30		242					57	99										75		242	99
264		36				62			24	27						42	48	51		264					30											48		264	126
286						89			39							24	51	60		286																		286	105
308						80			90							63	54	39		308																		308
330									54								39			330																		330
Genotype	Control
Linear regression	Row 1		Row 2		Row 3
	Anterior	Posterior	Anterior	Posterior	Anterior	Posterior
Best-fit values ± SE
Slope	-0,22 ± 0,046	0,284 ± 0,024	-0,37 ± 0,06	0,3283 ± 0,0225	-0,34 ± 0,15	0,3805 ± 0,0229
1/slope	-4.5	3.521	-2.7	3.046	-3	2.628
Speed (µm/min)	4.5	3.521	2.7	3.046	3	2.628
R square	0,82	0.9342	0.95	0.9636	0.54	0.9649
Equation	Y = -0,22*X + 37	Y = 0,284*X + 26,03	Y = -0,37*X + 13	Y = 0,3283*X + 20,51	Y = -0,34*X + 26	Y = 0,3805*X + 20,68
Genotype	scaBP2/scaBP2
Linear regression	Row 1		Row 2		Row 3
	Anterior	Posterior	Anterior	Posterior	Anterior	Posterior
Best-fit values ± SE
Slope	-0,04933 ± 0,03233	0,04986 ± 0,01626	-0,2155 ± 0,1066	0,1123 ± 0,04281	-0,2776 ± 0,06459	0,1587 ± 0,01431
1/slope	-20.27	20.06	-4.641	8.902	-3.603	6.303
Speed (µm/min)	20.27	20.06	4.641	8.902	3.603	6.303
R square	0.2254	0.4197	0.5052	0.4078	0.8219	0.9179
Equation	Y = -0,04933*X + 44,16	Y = 0,04986*X + 37,78	Y = -0,2155*X + 31,71	Y = 0,1123*X + 37,13	Y = -0,2776*X + 35,15	Y = 0,1587*X + 37,87
[truncated: 46 more columns]

## Sheet: Figure 3 - figure supplement 1C
Metric rank (µm)	R1 Control (division time min)																								Metric rank (µm)	R1 RNAisca
-390	Pupae 1		Pupae 2		Pupae 3		Pupae 4		Pupae 5		Pupae 6		Pupae 7		Pupae 8		Pupae 9		Pupae 10						-330	Pupae 1		Pupae 2		Pupae 3		Pupae 4		Pupae 5		Pupae 6		Pupae 7		Pupae 8		Pupae 9
-360	G	D	G	D	G	D	G	D	G	D	G	D	G	D	G	D	G	D	G	D					-300	G	D	G	D	G	D	G	D	G	D	G	D	G	D	G	D	G	D
-330																									-270
-300																									-240
-270																									-210
-240																									-180	18								45			42		78				114
-210			72	132						129		114													-150	75		66			66	39		42	33		144	60	138	78			72
-180			60	24	147	162	114	147	123	99		96	192	213			135			153					-120	75	108	45			45	51		114	105	51	12	24	39	45		30	36
-150	90	108	42	42	123	165	42	189	57	45	72	183	120	144	72	99	51	60		108					-90	69	159	24			24	42	15	24	36	24	6	81	33	21		63	63
-120	93	45	72	96	48	96	6	51	99	108	135	81	57	75	90	96	15	48	63	48					-60	144	87	111	90	90	111	45	45	3	24	18	18	36	144	9	39	48	9
-90	24	57	48	12	48	39	60	66	3	51	36	84	9	66	39	54	6	57	96	93					-30	0	45	3	33	33	3	81	63	24	33	15	3	45	39	36	117	33	18
-60	99	45	24	33	69	66	21	84	54	69	54	42	0	24	60	48	36	69	24	27					0	0	0	0	0	0	0	0	0	0	0	0	0	0	0	0	0	0	0
-30	21	15	18	0	105	15	9	33	33	21	30	30	21	21	36	81	18	63	9	18					30	6	30	6	60	60	6	12	15	30	33	6	105	57	24	42	96	9	24
0	0	0	0	0	0	0	0	0	0	0	0	0	0	0	0	0	0	0	0	0					60	3	78	3	15	15	3	15	21	42	51	3	81	39	51	3	9	9	75
30	15	9	18	54	54	42	45	15	15	57	120	66	3	33	99	9	12	51	18	51					90	3	36	63	6	6	63	87	27	39	105	36	108	81	42	57	84	18	15
60	9	81	72	162	84	6	66	24	60	108	27	63	27	162	24	3	27	36	6	69					120	21	93	57	27	27	57	66	6	51	39	48	75	54	45	90	60	33	33
90	48	48	189	45	66	144	33	177	81	108	96	165	48	63	57	48	30	81	144	66					150	72	81	72	72	72	72	60	93	24	36	96	102	84	120	54	36	54	36
120	24	63		33	114	93	81	72	57	114	78	168	63	126	63	54	132	60	42	129					180	93	60	0	27	27			30		93	75	120	81	63		78		63
150	135	48		72	126	150		57	129	123	66	123	189	75	87	69	60	75	3						210				39	39			54								6
180		87		117		108		165	141		108				129	57	69	120	33						240				78	78			51								33
210		96				162					159								123						270				48	48											24
																									300
																									330
																									360
Metric rank (µm)	R2 Control (division time min)																								390
-180	Pupae 1		Pupae 2		Pupae 3		Pupae 4		Pupae 5		Pupae 6		Pupae 7		Pupae 8		Pupae 9		Pupae 10
-150	G	D	G	D	G	D	G	D	G	D	G	D	G	D	G	D	G	D	G	D
-120	45													111											Metric rank (µm)	R2 RNAisca
-90	27	21		81		93		57	108	81	48			75			15	75		123					-240	Pupae 1		Pupae 2		Pupae 3		Pupae 4		Pupae 5		Pupae 6		Pupae 7		Pupae 8		Pupae 9
-60	6	42		54	45	3	117	102	51	54	126	81	42	21		36	12	30		54					-210	G	D	G	D	G	D	G	D	G	D	G	D	G	D	G	D	G	D
-30	24	45	6	66	36	21	36	111	87	153	63	36	84	24	21	3	15	12	45	51					-180
0	0	0	0	0	0	0	0	0	0	0	0	0	0	0	0	0	0	0	0	0					-150
30	75	90	126	12	9	3	66	54	45	30	39	63	24	24	18	45	21	27	9	15					-120			39	15	39	15				21			24					36
60	75	9	30	33	69	27	30	72	24	9	78	27	36	12	30	33	9	30	60	18					-90			12	18	12	18	51	102		72	78	45	36	33			72	9
90	75	84	30	36	54	78	54	99		75	87	30	15	57	9	63	45	81	21	36					-60			39	3	39	3	24	54	33	27	30	27	96	69	66		48	75
120	99	102	66	30	51	90	66	120		105		51	24		21	39	78	18	129	66					-30	141	36	33	9	33	9	21	30	36	45	42	0	69	48	78	15	117	12
150			39	96	99		117	141		261		93	36		21		81	66							0	0	0	0	0	0	0	0	0	0	0	0	0	0	0	0	0	0	0
180			27									117			75										30	30	15	48	9	48	9	24	72	12	42	60	33	18	24	51	6	48	21
																									60	120	60	141	0	141		18	33	51	30	27	60	24	27	63	18	117	9
																									90	57	60	15		15		24	66	39	60	60	60	48	111	72	21	54	6
																									120	78	105	126		126		57	75	105	126	66		63	57	45	36	117	18
Metric rank (µm)	R3 Control (division time min)																								150	126	51	75		75		72	117	156				90	81	84		90	66
-240	Pupae 1		Pupae 2		Pupae 3		Pupae 4		Pupae 5		Pupae 6		Pupae 7		Pupae 8		Pupae 9		Pupae 10		Pupae 11				180	132	24	45		45			123							48		75	75
-210	G	D	G	D	G	D	G	D	G	D	G	D	G	D	G	D	G	D	G	D	G	D			210
-180																									240
-150																									270
-120			72			81								132					48		150	105
-90		57	69		57	75		108	108		75			96					18	69	129	105
-60		12	30		24	51	123	45	30		45	33	18	54		90	33		63	42	15	27			Metric rank (µm)	R3 RNAisca
-30	90	51	48	30	45	81	81	102	153		27	87	27	66	165	12	30	30	48	60	3	36			-210	Pupae 1		Pupae 2		Pupae 3		Pupae 4		Pupae 5		Pupae 6		Pupae 7		Pupae 8		Pupae 9
0	0	0	0	0	0	0	0	0	0	0	0	0	0	0	0	0	0	0	0	0	0	0			-180	G	D	G	D	G	D	G	D	G	D	G	D	G	D	G	D	G	D
30	75	48	51	36	90	75	33	36	9	33	66	96	30	33	42	3	27	39	12	99	6	66			-150
60	66	60	48	33	0	51	195	27	60	6	78	33	30		66	18	42	42		69	42	75			-120									93						12
90	51	69	99	27	57	132	96	48	57	84	63	48	117		54	60	60	45				54			-90		96		24		24	3	51	21	54	51			21	21
120	57	120	96	60	69	156	228	99	105	36	72	48			66	66	66	57							-60	54	150	33	24	33	24	21	42	84	48	21	24	36	24	12	60
150	87		135	123			72	93		69		66			72			78							-30	150	21	12	9	12	9	18	27	42	12	144	18	12	0	9	24	36	102
180	156			87			177	114		105		93													0	0	0	0	0	0	0	0	0	0	0	0	0	0	18	0	0	0	0
210				159				153		138															30	24	45	39	27	39	27	45	9	63	87	72	0	0	54	54	24	3	27
240																									60	93	99	42	66	42	66		30	51	18	30	9	30	42		51	0	15
270																									90	60	48	105	54	105	54		12	48	114	120	18	12	72		78	18	90
300																									120			42		42			51		75	48	96	42	87			72	15
330																									150			45		45			108		96	87	3	15	99			0	36
																									180			87		87			51		141	0	78	75	0				93
																									210								84		87	0	114	87	0				87
																									240												123	51
																									270
																									300
																									330
	Genotype	Control																							Genotype	ScaRNAi
	Linear regression	Row 1		Row 2		Row 3																			Linear regression	Row 1		Row 2		Row 3
		Anterior	Posterior	Anterior	Posterior	Anterior	Posterior																			Anterior	Posterior	Anterior	Posterior	Anterior	Posterior
	Best-fit values ± SE																								Best-fit values ± SE
	Slope	-0.5417	0.4621	-0.3621	0.3426	-0.4985	0.5635																		Slope	-0,1686 ± 0,08467	0,0561 ± 0,06099	0,1576 ± 0,09048	0,3172 ± 0,1109	-0,1383 ± 0,09706	0,1929 ± 0,04038
	1/slope	-1.846	2.164	-2.762	2.919	-2.006	1.775																		1/slope	-5.932	17.83	6.346	3.152	-7.233	5.185
	Speed (µm/min)	1.846	2.164	2.762	2.919	2.006	1.775																		Speed (µm/min)	5.932	17.83	6.346	3.152	7.233	5.185
	R square	0.9068	0.9202	0.9639	0.7321	0.6585	0.9426																		R square	0.4978	0.1078	0.6027	0.6716	0.5036	0.7917
	Equation	Y = -0,5417*X + 10,85	Y = 0,4621*X + 29,66	Y = -0,3621*X + 33,71	Y = 0,3426*X + 25,00	Y = -0,4985*X + 33,19	Y = 0,5635*X + 20,02																		Equation	Y = -0,1686*X + 37,1	Y = 0,0561*X + 38,95	Y = 0,1576*X + 50,6	Y = 0,3172*X + 29,36	Y = -0,1383*X + 31,81	Y = 0,1929*X + 32,99
