# Supplementary material for: A neural progenitor mitotic wave is required for asynchronous axon outgrowth and morphology
Source: eLife journal article supplement (doi:10.7554/elife.75746), 2022-03-07
Supplement: supp [file elife-75746-supp-v1.zip › elife_poa_e75746_Figure_3_figure_supplement_3_source_data_1.xlsx]

## Sheet: Figure 3 - figure supplement 3
	Absence	Presence
Control	89	11
RNAi sca	66	34
