# Supplementary material for: A neural progenitor mitotic wave is required for asynchronous axon outgrowth and morphology
Source: eLife journal article supplement (doi:10.7554/elife.75746), 2022-03-07
Supplement: supp [file elife-75746-supp-v1.zip › elife_poa_e75746_Figure_4_source_data_1.xlsx]

## Sheet: Fig4B-Source Data
Figure 3B
Metric rank (µm)	Control
	Pupae 1		Pupae 2		Pupae 3		Pupae 4		Pupae 5		Pupae 6		Pupae 7		Pupae 8		Pupae 9		Pupae 10
	G	D	G	D	G	D	G	D	G	D	G	D	G	D	G	D	G	D	G	D
-240
-210
-180			0.323514			0.334563			0.42301
-150			0.371348			0.528593			0.668651		0.464125
-120			0.584537	0.302219	0.20509	0.892516	0.513642		0.419576	0.335712	0.631207			0.331235			0.379008	0.614784
-90	0.0633972		0.62649	0.519203	0.0645589	0.866556	0.558226		0.709143	0.300442	0.666035		0.550961	0.278562	0.424264	0.159249	0.310387	0.386093
-60	0.578476		0.666288	0.575182	0.620229	0.488979	0.812298	0.457728	0.578297	0.697734	0.729953		0.603341	0.385639	0.485402	0.523314	0.490549	0.250221	0.187175	0.531451
-30	0.762719	0.610683	0.771321	0.496036	0.808862	0.654573	0.938049	0.398656	0.772411	0.977698	0.843137	0.478767	0.182371	0.693917	0.835049	0.51332	0.449851	0.766798	0.142463	0.892997
0	1	1	1	1	1	1	1	1	1	1	1	1	1	1	1	1	1	1	1	1
30	0.909958	0.897093	0.750116	0.677545	0.911605	0.446629	0.655315	0.72607	0.50603	0.511335	0.613403	0.736626	0.743971	0.316853	0.950566	0.520668	0.626099	0.918994	0.425529	0.704162
60	0.80184	0.540316	0.772462	0.603342	0.293913	0.775044	0.509193	0.88624	0.553817	0.311352		0.614162	0.524447	0.677688	0.452841	0.626665	0.707359	0.654794	0.38035	0.578503
90	0.481414	0.659079		0.616296	0.484307	0.73272		0.717304	0.457008	0.710372		0.848468	0.265	0.315947	0.652046	0.647527	0.657228	0.4409	0.686459	0.338329
120	0.577544	0.312381		0.0549024	0.675019	0.522098		0.753112	0.528335	0.558381		0.680859			0.575761	0.48093	0.502283		0.320863	0.560341
150	0.781558	0.27872		0.763116	0.572736	0.386039		0.923818				0.780205				0.398453
180	0.542871	0.478386		0.291748	0.426893	0.505956		0.582535				0.72863
210	0.452193	0.0297652		0.663188	0.544284			0.610081				0.903751
240	0.315994	0.439274		0.0489623	0.310988			0.595877
Metric rank (µm)	scaBP2
	Pupae 1		Pupae 2		Pupae 3		Pupae 4		Pupae 5		Pupae 6		Pupae 7		Pupae 8		Pupae 9
	G	D	G	D	G	D	G	D	G	D	G	D	G	D	G	D	G	D
-264					0.695557	0.492119
-242	0.288249				0.342506	0.616071			0.552107	0.554555
-220	0.345903				0.666347	0.403104			0.760081	0.664163						0.259245
-198	0.240352				0.435165	0.473225	0.453235		0.449694	0.580808	0.291818					0.742074
-176	0.464074				0.64902	0.70797	0.293449		0.998328	0.948221	0.273826					0.781839	0.415014
-154	0.444863				0.152413	0.506643	0.353743		0.585529	0.45702	0.452347	0.473514				0.776108	0.616987
-132	0.501621			0.675949	0.608271	0.596055	0.20308	0.265198	0.77883	0.702597	0.474512	0.339988				0.865517	0.684642
-110	0.389032			0.467211	0.736222	0.698299	0.466024	0.607549	0.415759	0.430114	0.417679	0.524669				0.905747	0.707528	0.306481
-88	0.835749			0.670438	0.854249	0.835902	0.511999	0.33632	0.834016	0.763809	0.547258	0.395345	0.60548			0.853073	0.553526	0.665422
-66	0.670411	0.0290697	0.426196	0.655117	0.54483	0.607288	0.586497	0.541216	0.784915	0.682116	0.925987	0.391908	0.793702	0.561222	0.243065	0.629977	0.597919	0.568385
-44	0.418693	0.208856	0.479294	0.379787	0.539065	0.642179	0.448673	0.610302	0.739416	0.754826	0.811434	0.442635	0.683112	0.658847	0.496656	0.561329	0.62005	0.733316
-22	0.672088	0.747453	0.365829	0.963865	0.570616	0.688321	0.891326	0.971635	0.840599	0.706305	0.671408	0.702534	0.603869	0.710563	0.64893	0.94596	0.644067	0.84258
0	1	1	1	1	1	1	1	1	1	1	1	1	1	1	1	1	1	1
22	0.705709	0.625344	0.773471	0.824542	0.713871	0.780537	0.578715	0.609231	0.953326	0.585122	0.617442	0.679998	0.872996	0.782469	0.607905	0.881979	0.957492	0.856167
44	0.702041	0.53943	0.800315	0.593446	0.54585	0.668225	0.324043	0.837929	0.538816		0.516755	0.557037	0.535387	0.949844	0.658207	0.668224	0.528256	0.921698
66	0.63772	0.591659	0.945927	0.666569		0.798153	0.48198	0.597248			0.579465	0.427391	0.842692	0.788839	0.447841		0.59663	0.760945
88	0.792949	0.448883	0.728215	0.652977		0.353761	0.428586	0.703263			0.520934	0.572016		0.949837	0.587866		0.532628
110	0.524747	0.715461	0.831574	0.816257			0.65909					0.564748		0.833038	0.372291
132	0.406561	0.546484	0.555299				0.427645							0.594328	0.543904
154	0.511687	0.491668	0.665446
176	0.623761	0.63703	0.685421
198		0.440558	0.592818
220		0.545627	0.462718
242
264
286
308

## Sheet: Fig4D-Source Data
	Anterior branch		Posterior branch
	Control	scaBP2	Control	scaBP2
	79.6152	16.1577	17.8911	27.9817
	38.3023	4.77544	45.7082	20.3636
	7.5999	70.219	78.7391	16.9215
	95.1825	10.7122	23.2536	27.1824
	92.4865	14.3237	40.3574	9.82136
	89.3878	46.2727	53.2022	34.0952
	87.4415	5.26231	48.0131	51.1795
	90.4491	46.6225	54.8957	24.2453
	35.9915	16.1403	57.574	22.1003
	75.1288	19.2144	47.825	26.3321
	76.4694	4.79632	31.8137	29.7822
	10.8398	14.7065	32.6869	57.3653
	58.8823	8.84087	56.7714	20.5112
	22.8953	18.8422	22.9946	23.2163
	84.9866	8.71034	36.7559	4.89716
	84.0487	17.7605	56.0452	48.0631
	87.7031	15.4788	33.1338	22.6792
	90.7813	72.5474	37.6114	37.6144
	62.9395	23.6644	42.7505	55.466
	21.5872	19.0253	24.9506	19.5651
	27.6395	46.3168	45.0026	7.68575
	21.2221	13.4085	44.8321	48.7511
	70.6306	12.9966	52.4467	22.3637
	12.7552	23.9872	51.8234	54.4429
	95.8146	63.7715	22.8938	16.8309
	52.823	13.0042	26.5603	43.5561
	19.8653	30.4496	72.227	9.69347
	51.9792	51.0649	75.9343	54.5282
	85.9244	7.54198		30.6054
	83.7665	63.21		55.0809
		11.0415		9.70729
		27.9485		31.8049
		16.3923		7.63547
		10.0871		34.5215
		24.0821		20.4362
		10.8989		33.4837
		26.388		6.16547
		26.9939		5.80003
		8.50277		6.26632
		26.1613		40.1633
		24.8833
		18.5405
		10.3317
