# Supplementary material for: A neural progenitor mitotic wave is required for asynchronous axon outgrowth and morphology
Source: eLife journal article supplement (doi:10.7554/elife.75746), 2022-03-07
Supplement: supp [file elife-75746-supp-v1.zip › elife_poa_e75746_Figure_5_source_data_1.xlsx]

## Sheet: Feuil1
Fly number	Control (puffs before cleaning)											RNAi sca (puffs before cleaning)
1	3	15	4	5	4	7	5	7	16	7		20	11	21	11	28	27	25	28	46	19
2	8	3	5	3	3	2	5	14	15	3		3	6	4	11	5	23	5	22	22	31
3	4	4	3	7	4	4	4	5	5	4		20	13	4	3	4	4	3	6	7	8
4	10	8	13	11	9	30	17	17	12	19		12	5	5	4	9	4	4	7	4	6
5	8	2	3	4	3	3	3	3	2	2		3	2	3	2	9	5	3	2	3	3
6	4	3	3	3	4	20	4	3	9	3		6	11	5	5	31	5	8	4	5	4
7	16	14	14	20	19	13	18	18	29	26		24	9	9	6	23	10	12	11	6	9
8	4	3	2	2	3	3	3	4	4	2		4	3	2	3	3	5	3	5	4	4
9	7	8	4	4	4	4	5	4	4	5		33	30	28	35	29	36	74	50	29	31
10	15	5	5	6	10	6	7	5	7	5		6	3	8	18	12	13	14	20	10	10
11	56	37	83	61	56	11	9	8	17	9		6	1	6	16	11	18	29	19	6	20
12	4	7	3	4	5	3	3	3	3	2		6	6	7	3	3	6	6	6	10	7
13	7	2	12	10	8	3	9	27	21	6		3	5	15	4	5	7	5	7	17	16
14	7	8	17	32	5	4	5	8	6	4		35	25	18	32	44	33	76	40	36	58
15	4	8	2	7	13	4	17	16	8	21		18	24	57	56	66	41	51	63	58	63
16	5	4	5	18	19	8	6	4	25	4		23	16	25	28	27	15	23	31	39	23
17	5	4	31	35	40	43	15	13	23	28		18	7	19	20	22	17	27	17	27	2
18	18	18	19	25	23	16	25	12	18	22		5	3	8	6	6	4	4	4	4	9
19	9	4	10	3	8	11	7	6	6	6		27	63	32	20	21	7	18	35	18	25
20	5	3	2	3	4	3	3	3	2	2		5	6	15	7	13	11	12	10	10	12
21	14	17	16	12	6	8	11	7	11	9		15	5	4	5	4	3	4	6	5	4
22	6	5	4	5	4	5	4	3	4	3		5	6	10	7	4	5	4	6	10	7
23	13	3	10	21	19	3	7	18	21	23		6	6	3	2	4	11	9	4	10	9
24	3	3	3	4	5	3	4	3	3	2		8	3	6	3	3	5	5	5	6	4
25	4	13	8	22	22	28	13	32	27	29		10	8	5	6	8	18	17	16	10	12
26	4	3	3	3	4	3	4	4	3	4		5	8	5	14	32	5	5	32	12	22
27	12	12	19	5	7	4	6	9	13	11		5	9	44	42	4	25	58	4	37	24
28	7	2	7	4	22	5	17	6	26	18		15	63	23	7	6	5	5	23	22	16
29	9	2	11	5	2	1	2	2	7	2		5	8	8	5	5	20	23	21	12	29
30	2	3	3	3	5	2	3	2	3	5		13	13	6	3	6	5	4	3	5	4
31	4	8	24	3	5	21	12	5	13	17		2	2	3	3	3	2	2	2	3	3
32	4	4	4	3	4	4	3	3	3	3		28	4	26	37	22	24	25	50	66	59
33	9	4	10	5	7	6	6	10	13	12		14	7	16	9	15	12	8	7	6	8
34	3	15	15	15	15	11	20	3	16	12		15	3	6	8	7	7	12	3	13	4
35	6	6	13	5	4	2	3	3	5	5		8	9	22	12	7	20	10	9	13	15
