# Supplementary figures and images for: A neural progenitor mitotic wave is required for asynchronous axon outgrowth and morphology
Source: eLife journal article supplement (doi:10.7554/elife.75746), 2022-03-07

**A**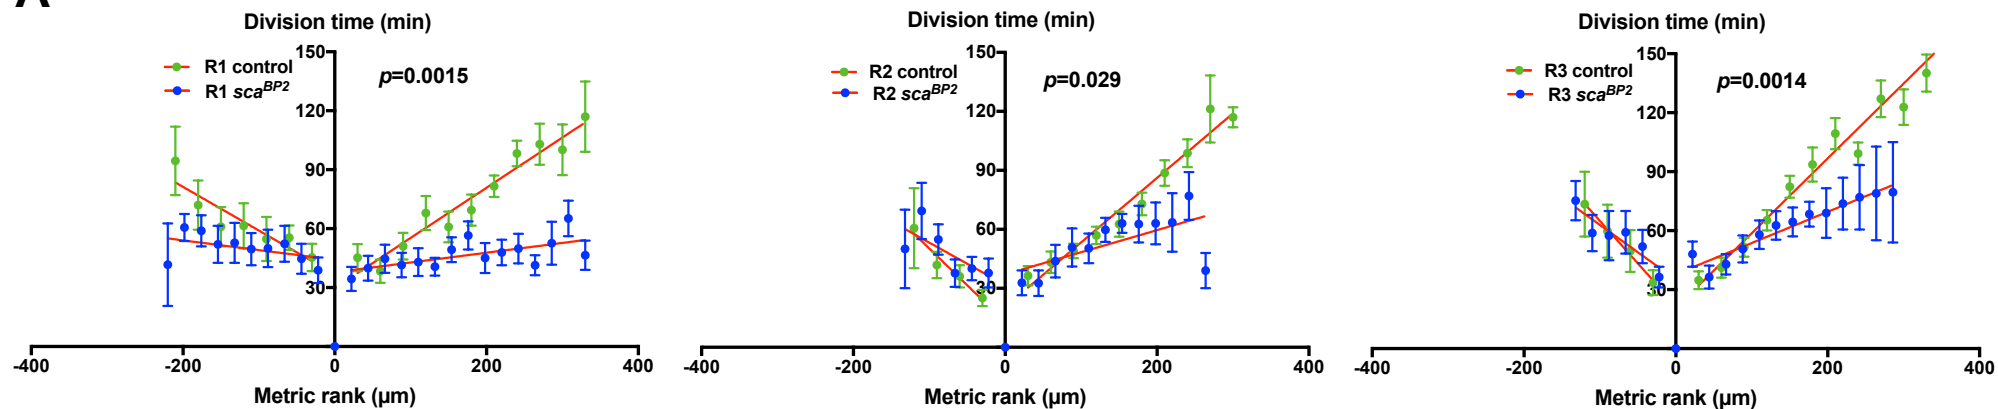**B**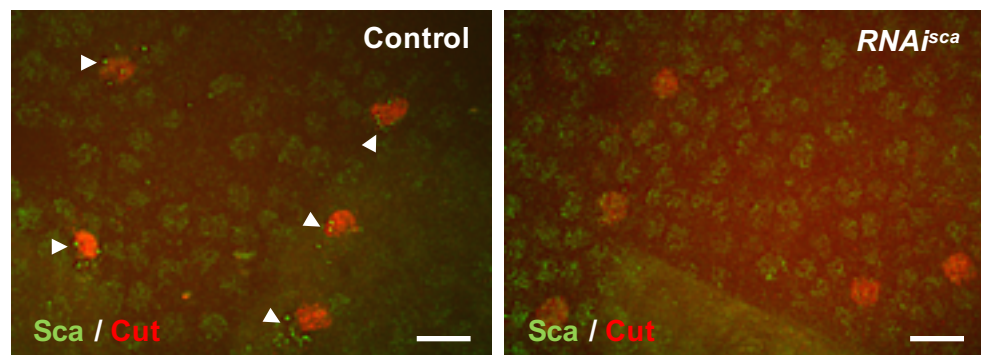**C**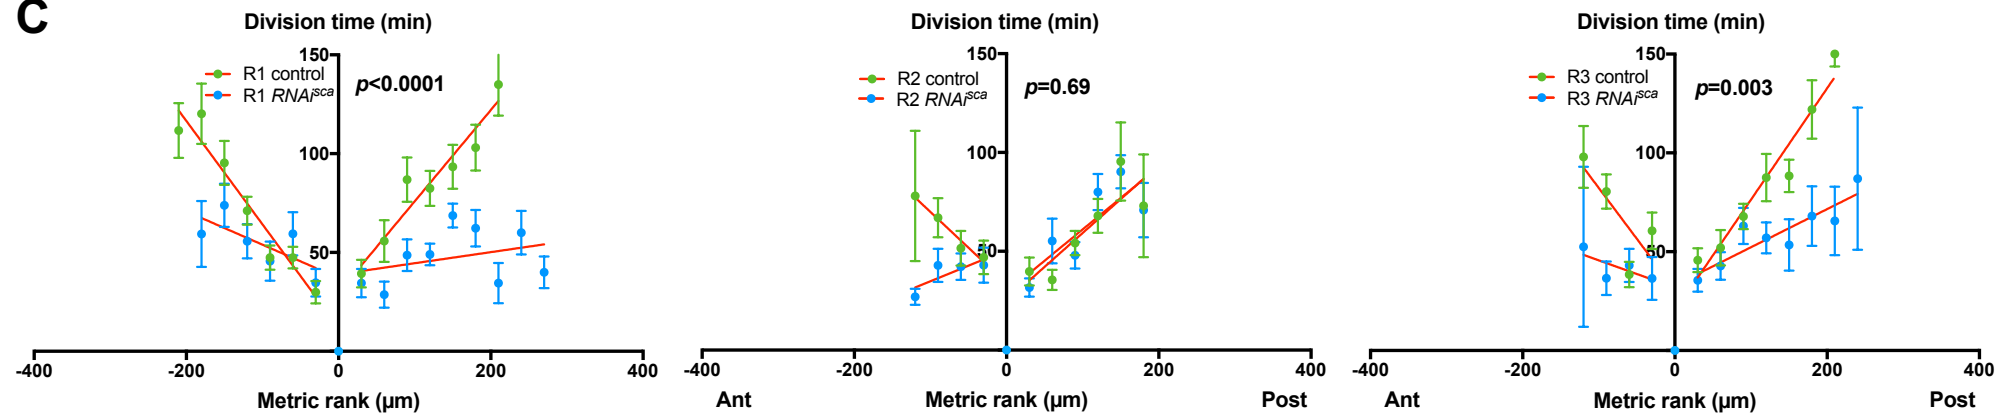

Supplement: supp [file elife-75746-supp-v1.zip]

**A**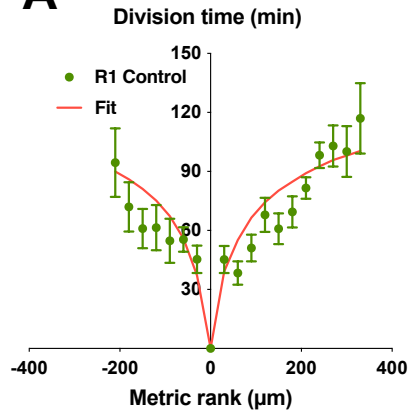**C**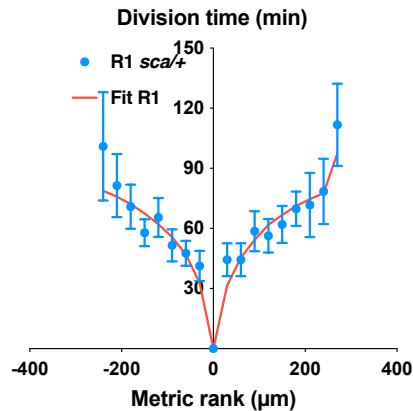**B**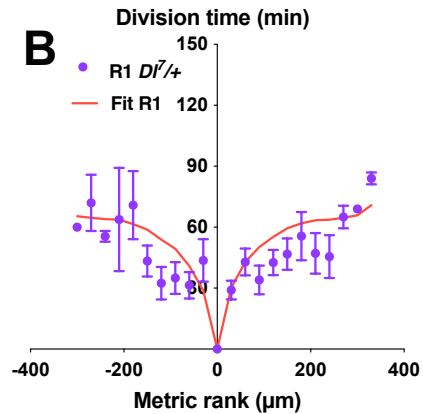**D**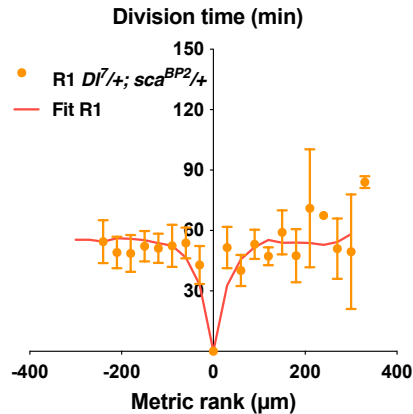**F**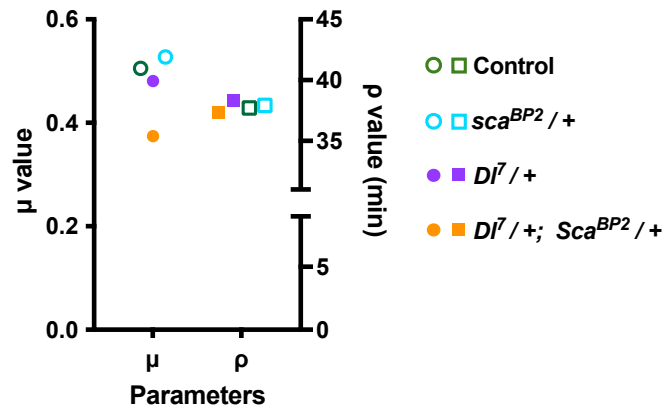

Supplement: supp [file elife-75746-supp-v1.zip]

**Absence  
of medial  
commissure**

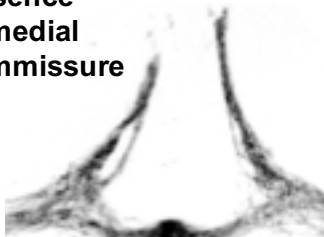

**Presence  
of medial  
commissure**

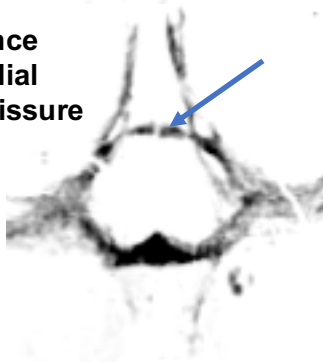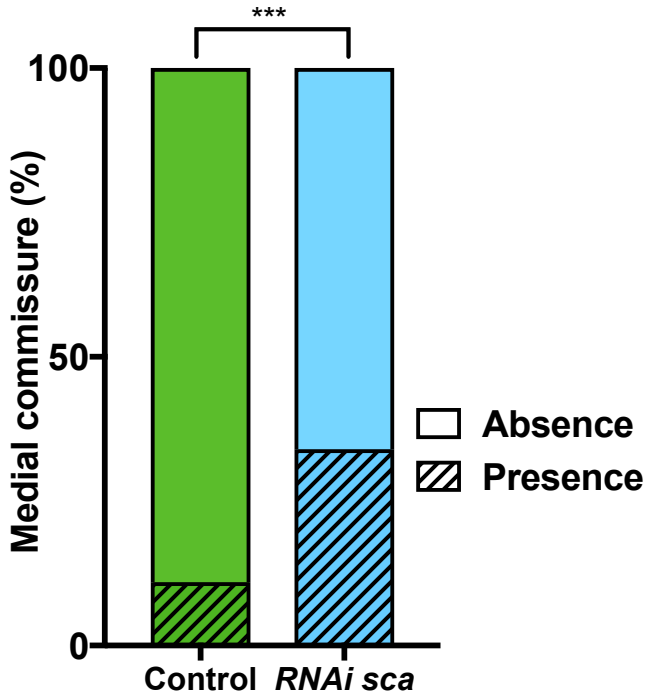

Supplement: supp [file elife-75746-supp-v1.zip]

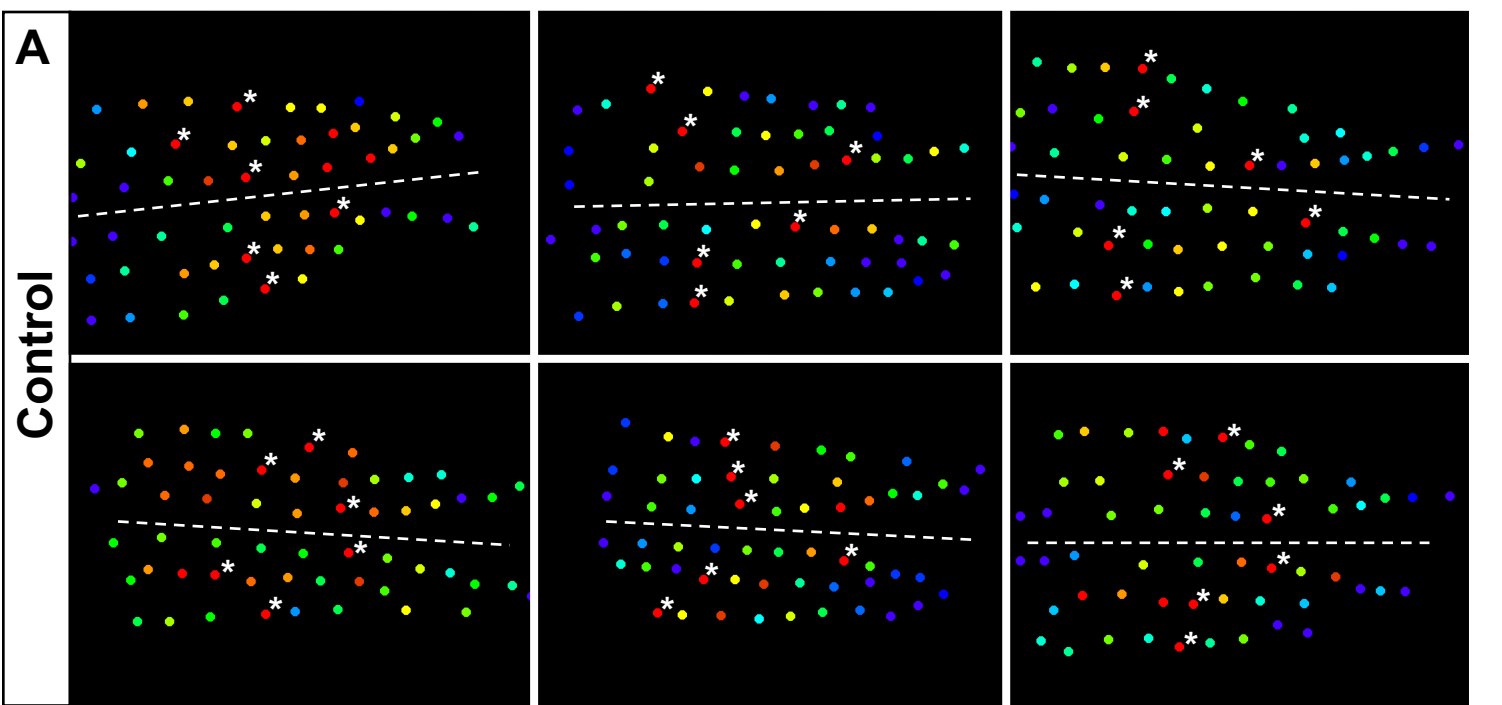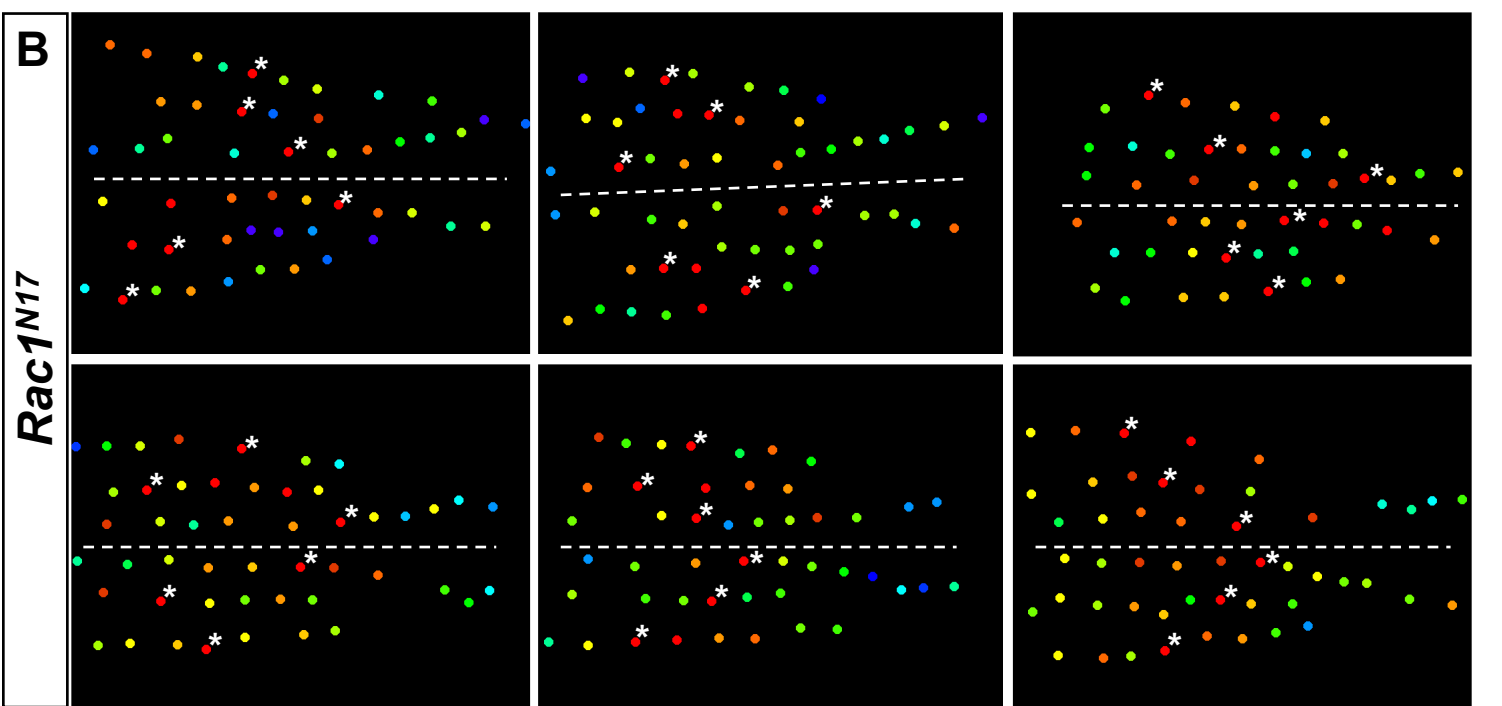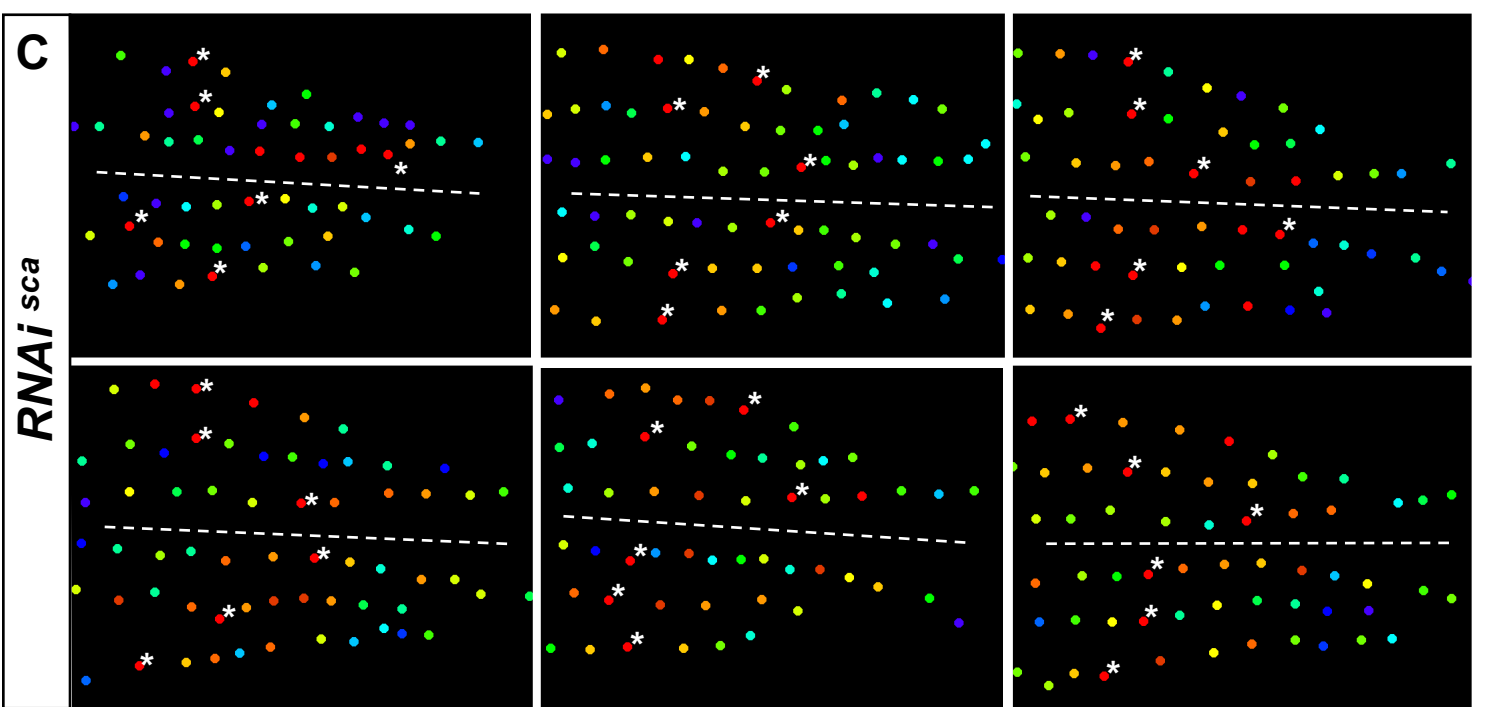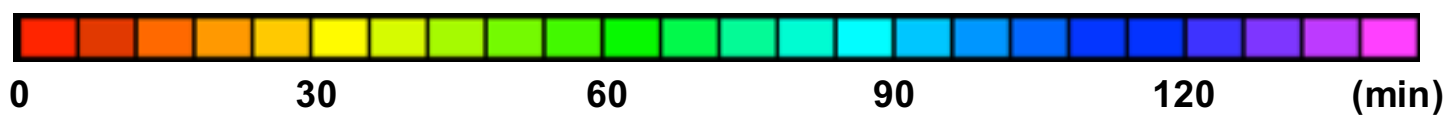

Supplement: supp [file elife-75746-supp-v1.zip]

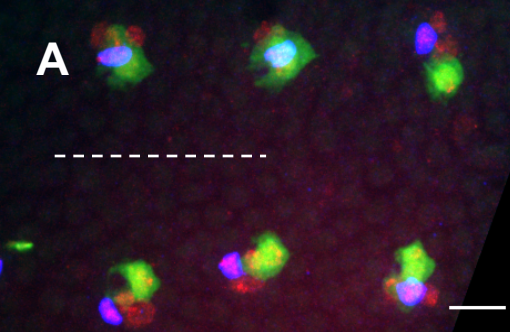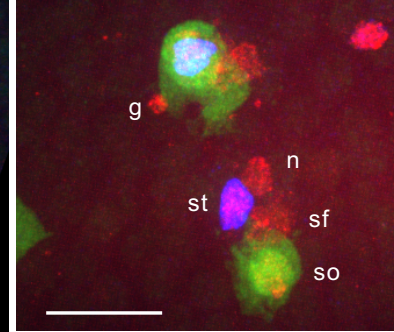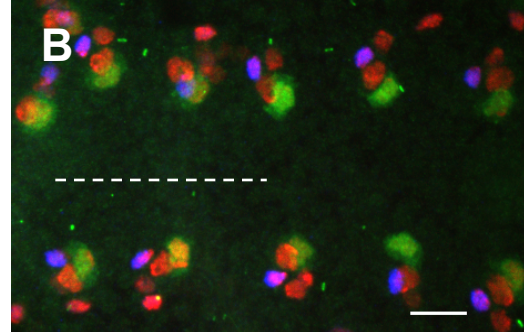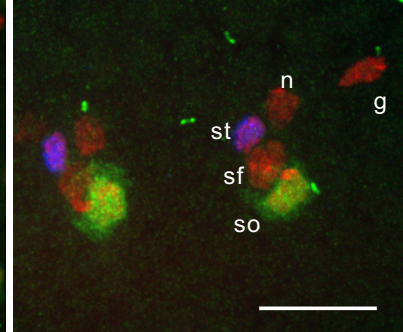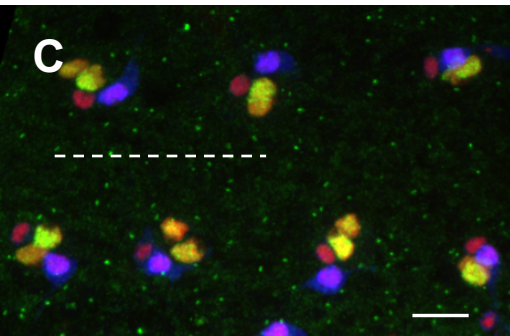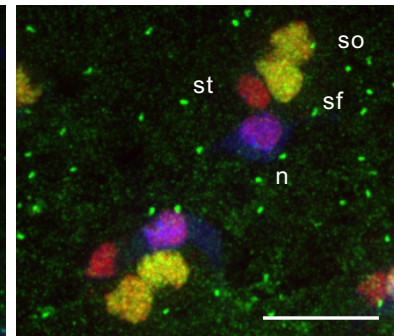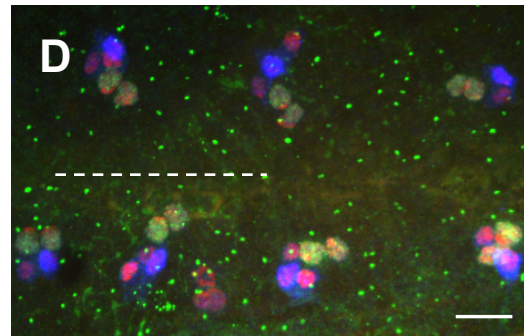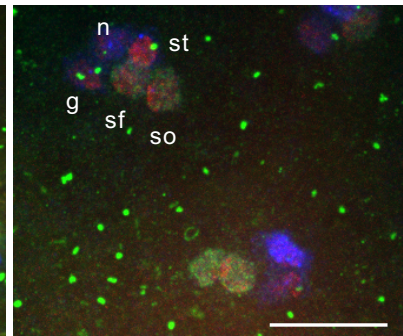

Supplement: supp [file elife-75746-supp-v1.zip]

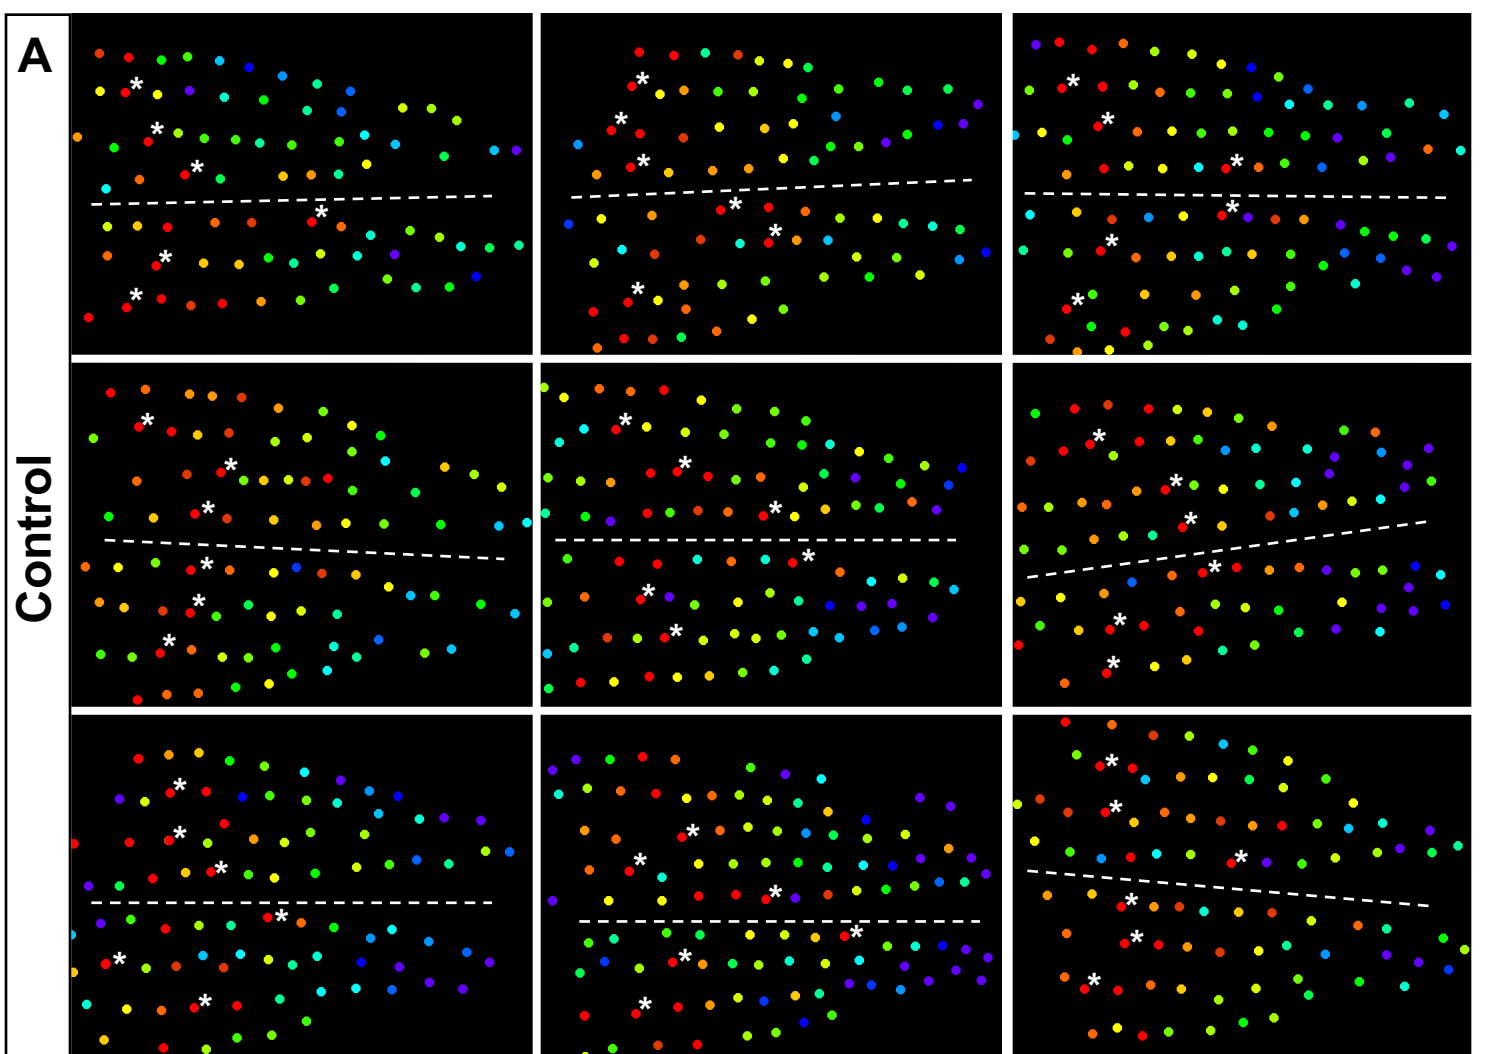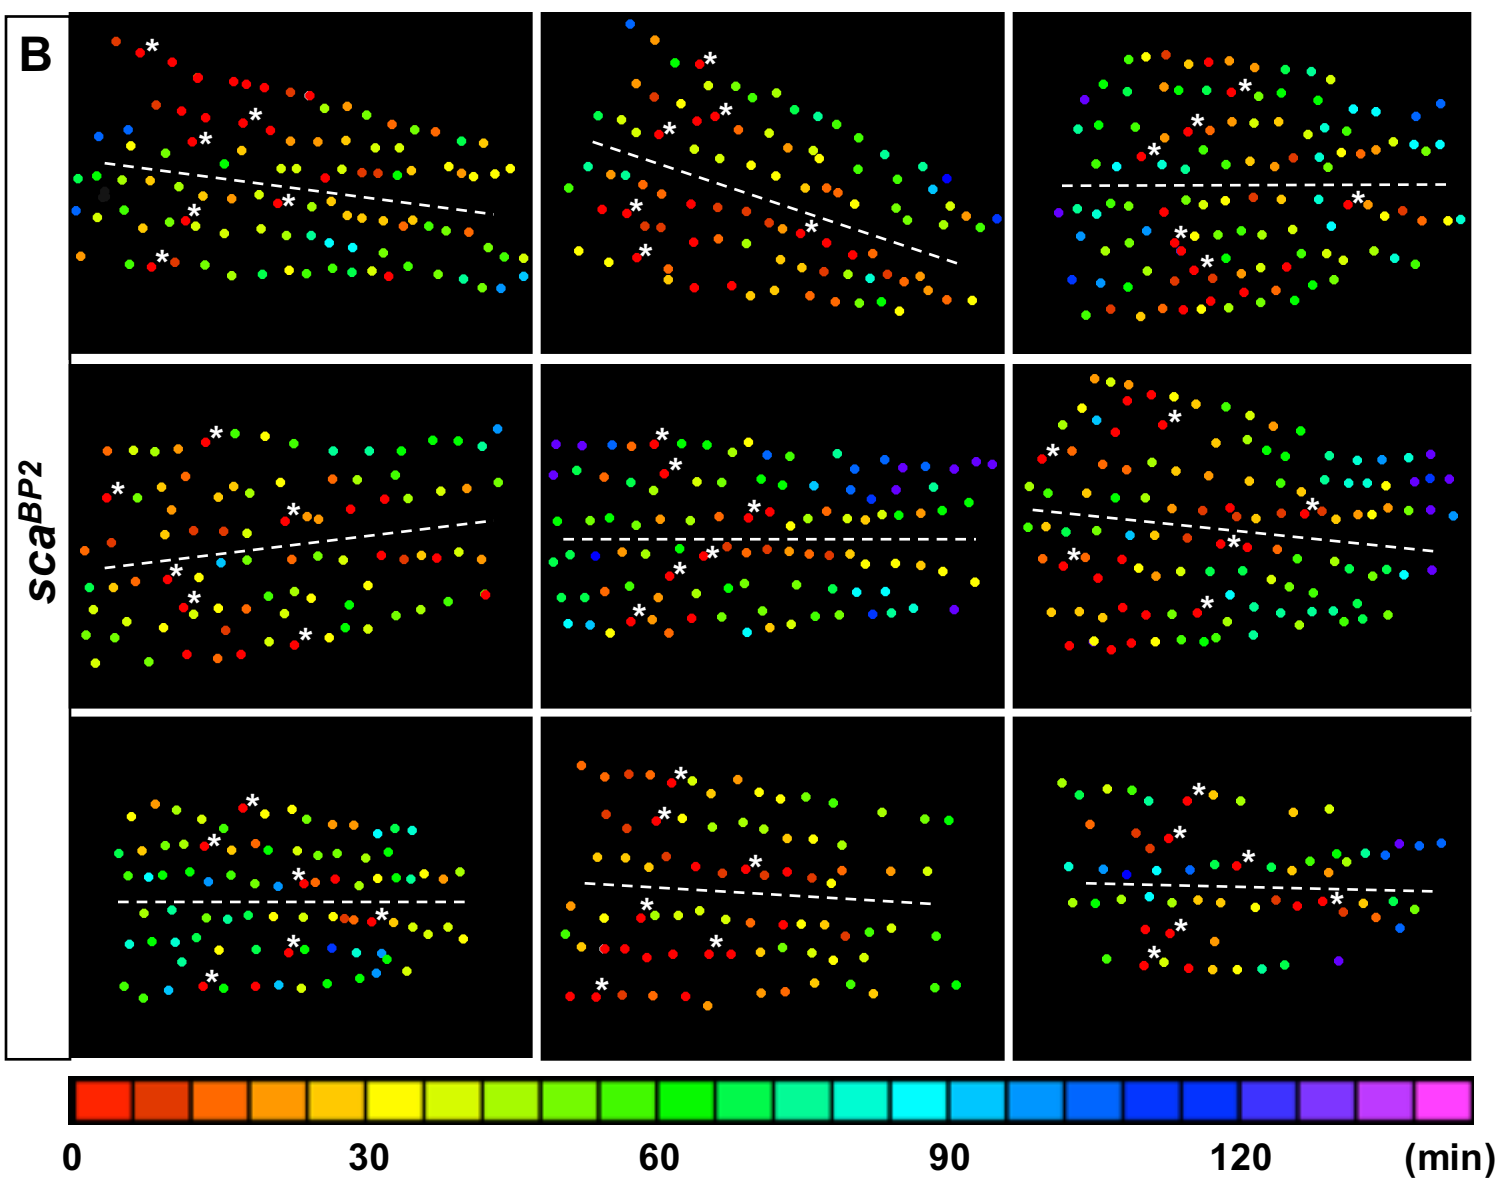

Supplement: supp [file elife-75746-supp-v1.zip › elife_poa_e75746_Figure_1_figure_supplement_1.pdf]

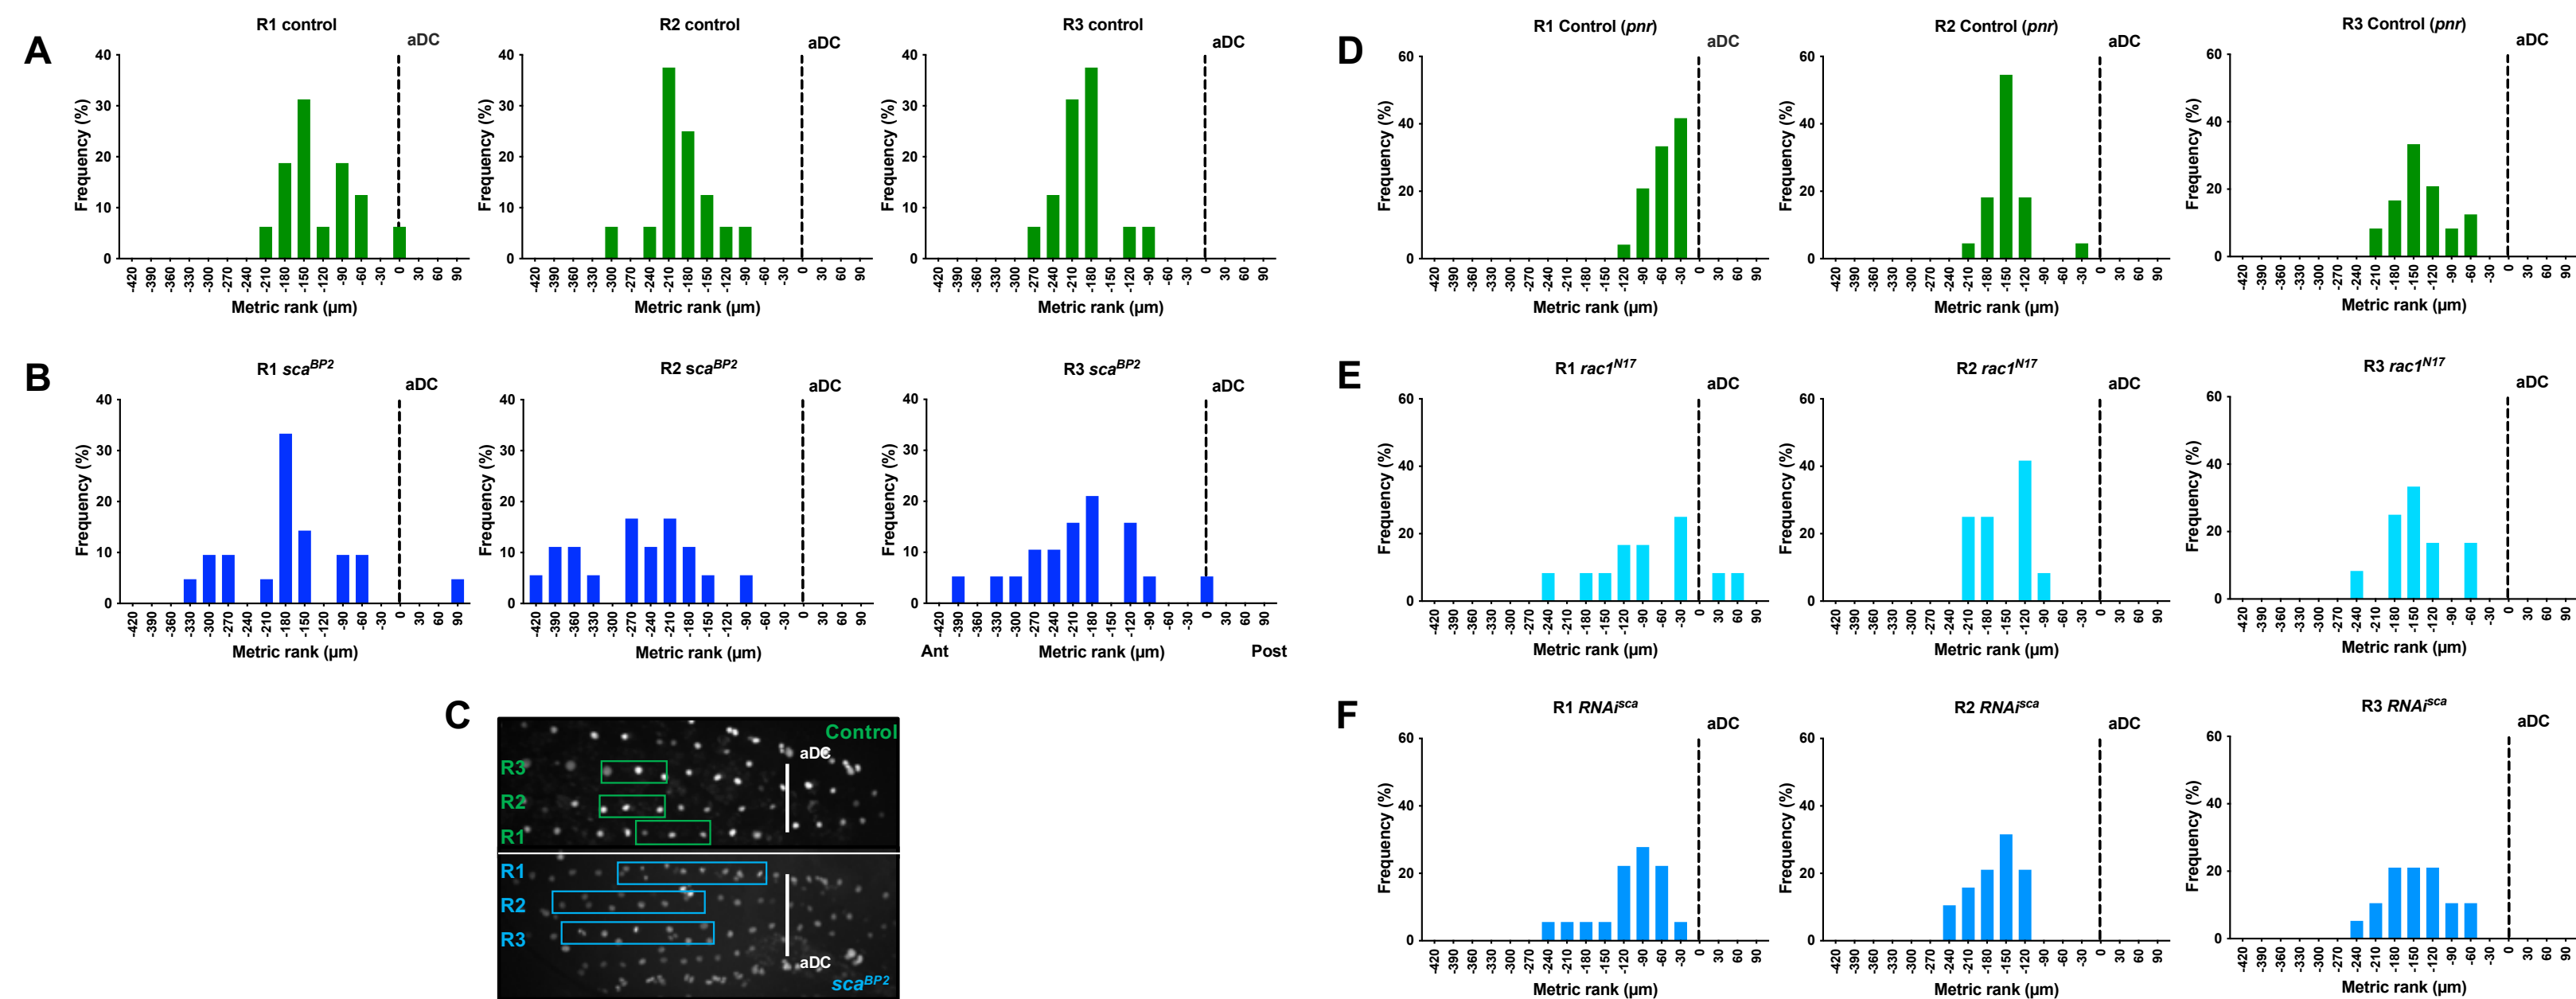

Supplement: supp [file elife-75746-supp-v1.zip › elife_poa_e75746_Figure_1_figure_supplement_2.pdf]

**A**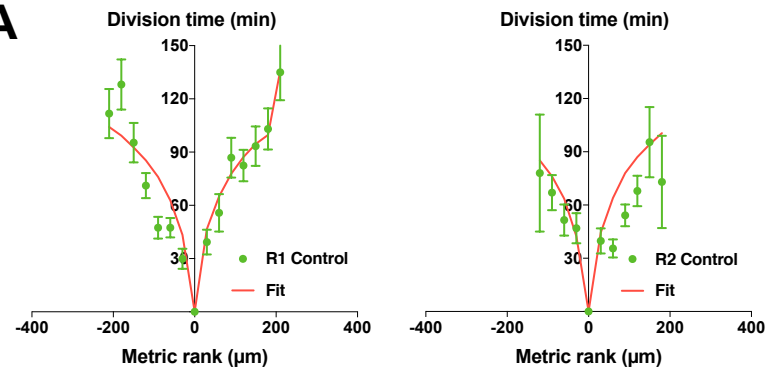**D**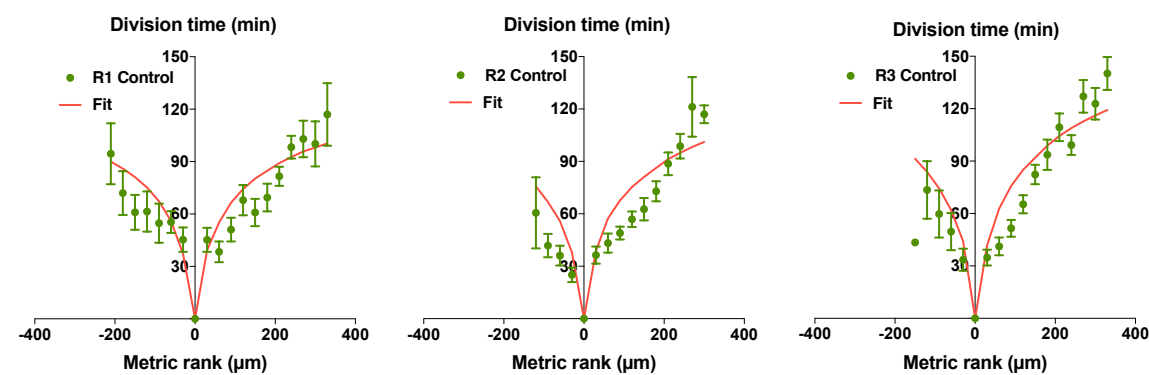**B**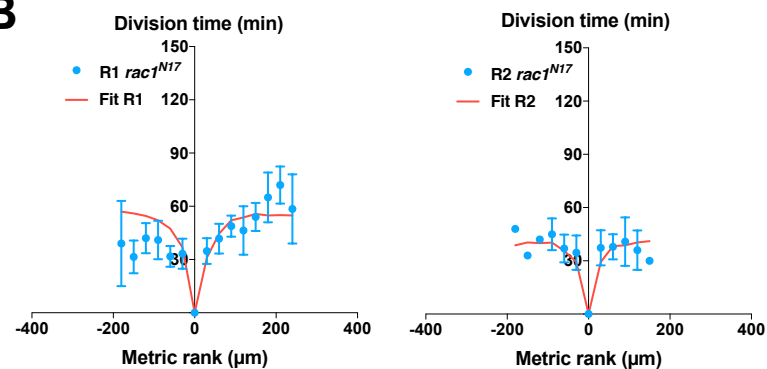**E**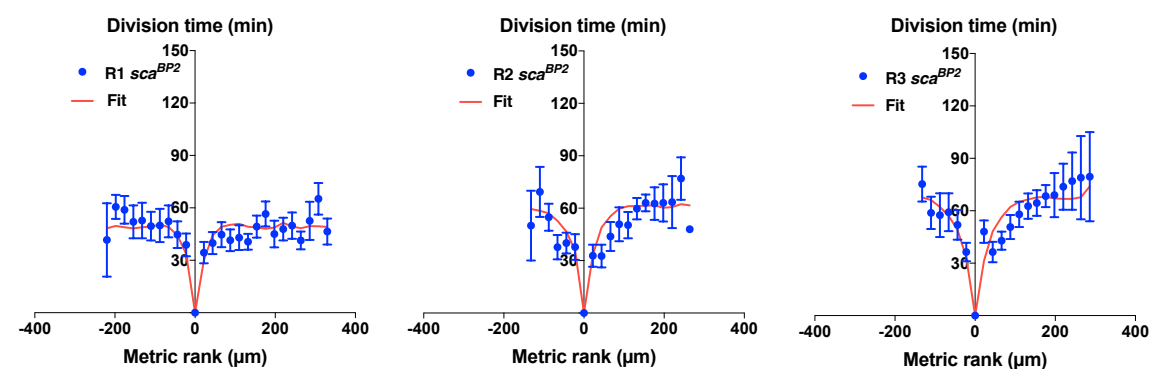**C**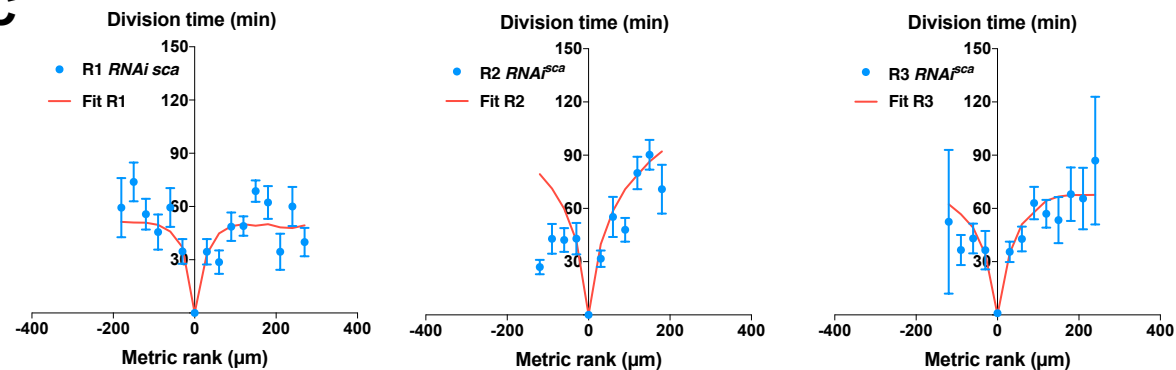**F**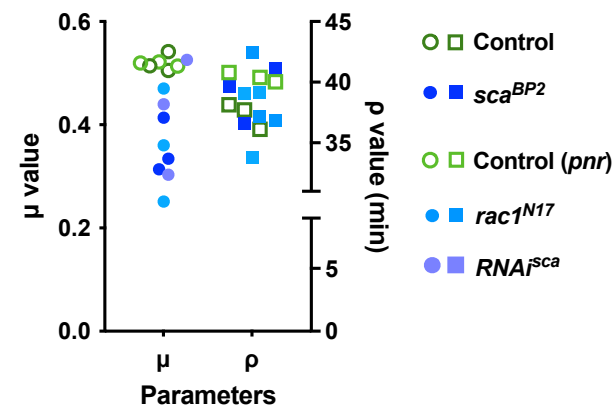

Supplement: supp [file elife-75746-supp-v1.zip › elife_poa_e75746_Figure_1_figure_supplement_3.pdf]

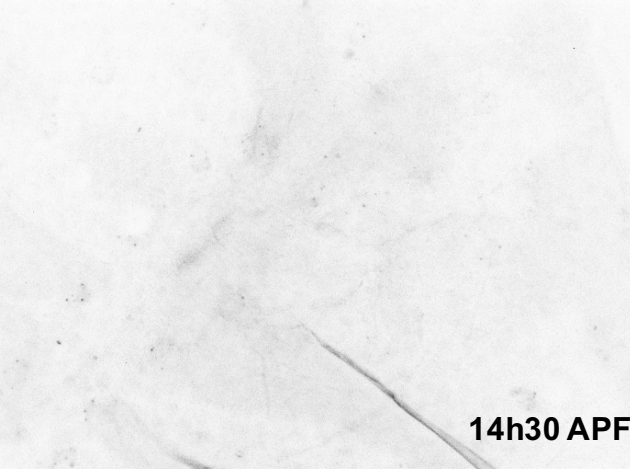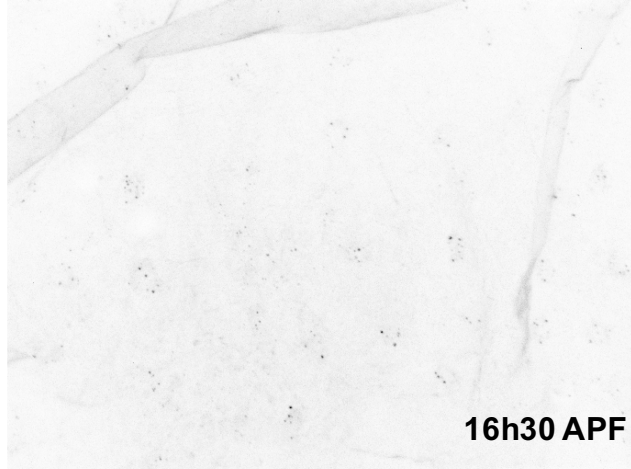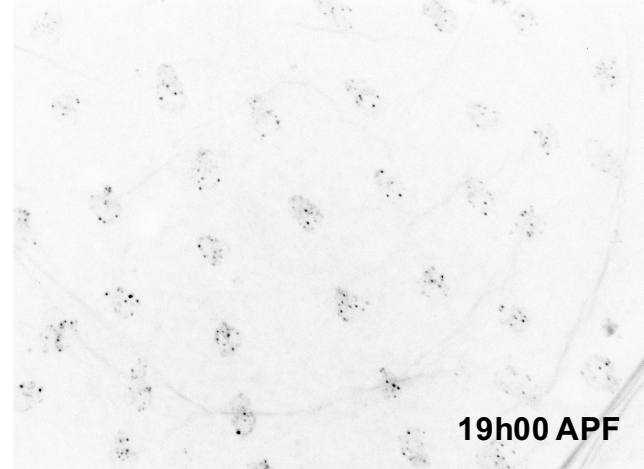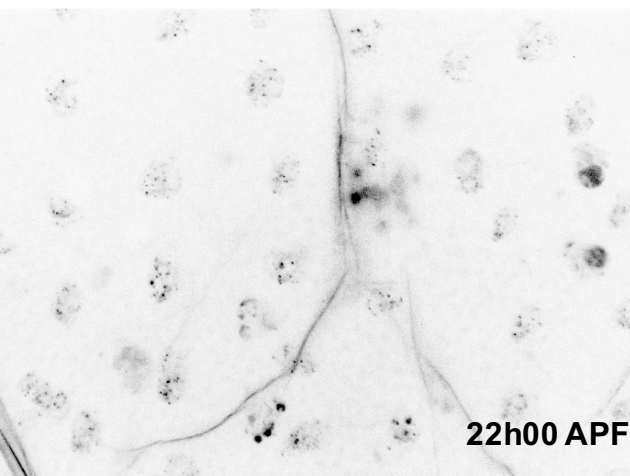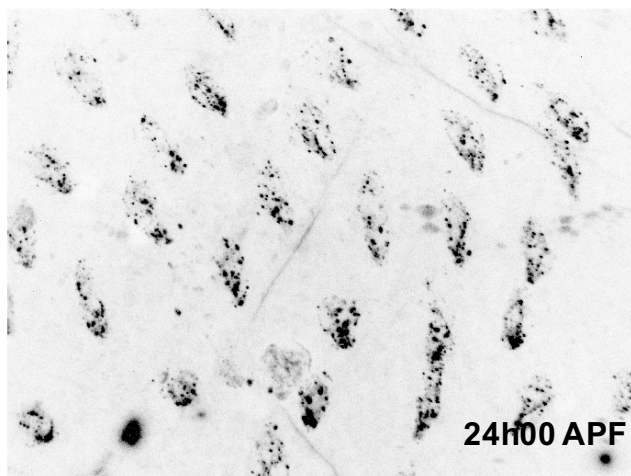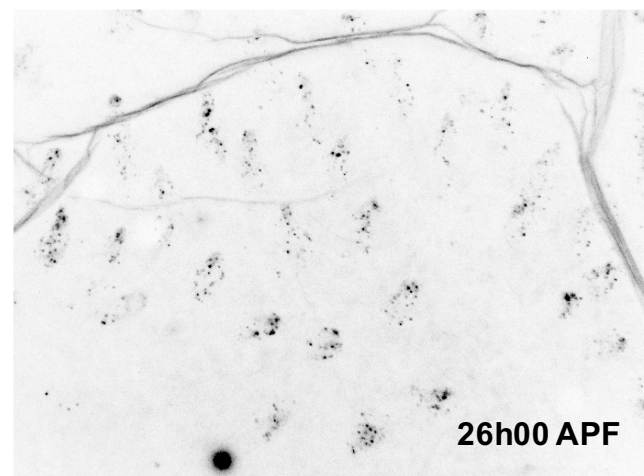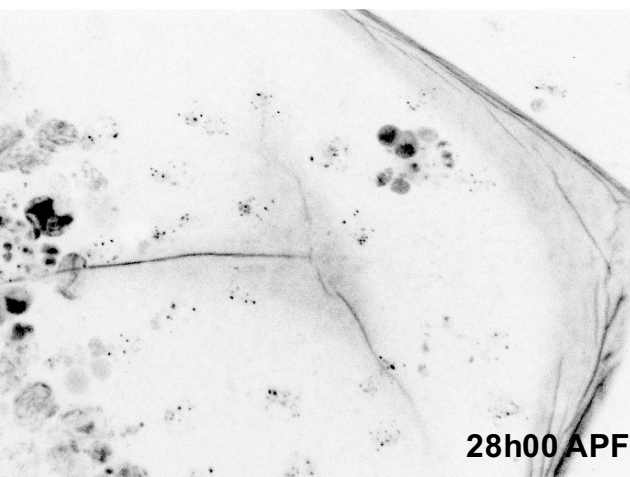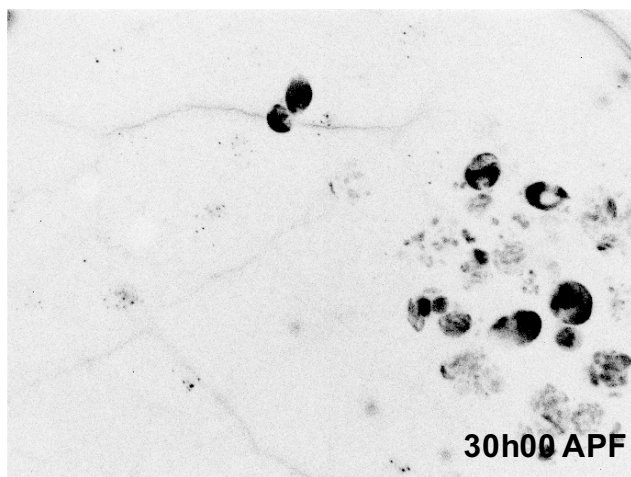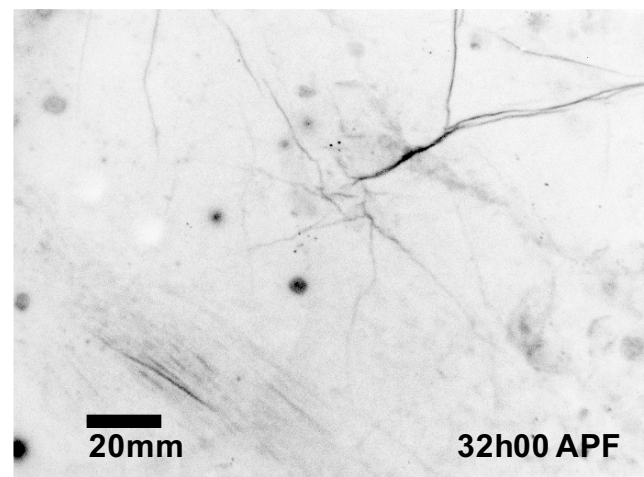

Supplement: supp [file elife-75746-supp-v1.zip › elife_poa_e75746_Figure_2_figure_supplement_2.pdf]
